# Supplementary material for: Ratiometric quorum sensing governs the trade-off between bacterial vertical and horizontal antibiotic resistance propagation
Source: PLoS Biol. 2020 Aug 14;18(8):e3000814. doi: 10.1371/journal.pbio.3000814 (PMC7449403; doi:10.1371/journal.pbio.3000814)
Supplement: S4 Data — (CSV) [file pbio.3000814.s012.csv]

Time (min)	Position	cCF10 (nM)	Optical density
0	12	0	0.0432499985
20.0016666666667	12	0	0.0493000045
40.0033333333333	12	0	0.05455
60.0066666666667	12	0	0.0586499905
80.0083333333333	12	0	0.0656500045
100.01	12	0	0.069100008
120.011666666667	12	0	0.0766500005
140.013333333333	12	0	0.0789000055
160.016666666667	12	0	0.083100006
180.018333333333	12	0	0.087949995
200.02	12	0	0.090200003
220.021666666667	12	0	0.095249996
240.025	12	0	0.098899997
260.026666666667	12	0	0.102600001
280.028333333333	12	0	0.107300006
300.03	12	0	0.1110999955
320.031666666667	12	0	0.114250001
340.033333333333	12	0	0.1215500015
360.036666666667	12	0	0.122850001
380.038333333333	12	0	0.128099996
400.04	12	0	0.1288500015
420.041666666667	12	0	0.131899994
440.045	12	0	0.136050005
460.046666666667	12	0	0.1361000055
480.048333333333	12	0	0.140100002
500.05	12	0	0.1425499945
520.051666666667	12	0	0.1430999935
540.055	12	0	0.1460499985
560.056666666667	12	0	0.143999997
580.058333333333	12	0	0.145299994
600.06	12	0	0.144950006
620.061666666667	12	0	0.1444999985
640.065	12	0	0.1434999965
660.066666666667	12	0	0.1377999965
680.068333333333	12	0	0.1378500015
700.07	12	0	0.139200002
720.071666666667	12	0	0.1342999975
740.075	12	0	0.1319000015
760.076666666667	12	0	0.1278499995
780.078333333333	12	0	0.125750001
0	11	0	0.0392500015
20.0016666666667	11	0	0.044449992
40.0033333333333	11	0	0.051899996
60.0066666666667	11	0	0.0591999995
80.0083333333333	11	0	0.0656999975
100.01	11	0	0.0738500055
120.011666666667	11	0	0.0799500045
140.013333333333	11	0	0.089649994
160.016666666667	11	0	0.0971000005
180.018333333333	11	0	0.102500003
200.02	11	0	0.1133499965
220.021666666667	11	0	0.1208
240.025	11	0	0.130399991
260.026666666667	11	0	0.1365000085
280.028333333333	11	0	0.1455500015
300.03	11	0	0.152150005
320.031666666667	11	0	0.158699993
340.033333333333	11	0	0.168200005
360.036666666667	11	0	0.1747499965
380.038333333333	11	0	0.1788499915
400.04	11	0	0.178600013
420.041666666667	11	0	0.183449995
440.045	11	0	0.1894000095
460.046666666667	11	0	0.1939000155
480.048333333333	11	0	0.2020499925
500.05	11	0	0.2029499935
520.051666666667	11	0	0.2060999905
540.055	11	0	0.209350001
560.056666666667	11	0	0.207400013
580.058333333333	11	0	0.207850005
600.06	11	0	0.2084
620.061666666667	11	0	0.2116499915
640.065	11	0	0.2107000085
660.066666666667	11	0	0.205600012
680.068333333333	11	0	0.2061499915
700.07	11	0	0.2042999895
720.071666666667	11	0	0.2041500015
740.075	11	0	0.1998499855
760.076666666667	11	0	0.1947000065
780.078333333333	11	0	0.1936999895
0	10	0	0.039299999
20.0016666666667	10	0	0.046749995
40.0033333333333	10	0	0.055650007
60.0066666666667	10	0	0.065899998
80.0083333333333	10	0	0.075999994
100.01	10	0	0.084750004
120.011666666667	10	0	0.0953500045
140.013333333333	10	0	0.108199999
160.016666666667	10	0	0.115900006
180.018333333333	10	0	0.1225499915
200.02	10	0	0.1353
220.021666666667	10	0	0.1419000025
240.025	10	0	0.151149995
260.026666666667	10	0	0.161800004
280.028333333333	10	0	0.171950001
300.03	10	0	0.176549989
320.031666666667	10	0	0.186600011
340.033333333333	10	0	0.196600002
360.036666666667	10	0	0.2060000115
380.038333333333	10	0	0.214149989
400.04	10	0	0.2221500015
420.041666666667	10	0	0.2260499935
440.045	10	0	0.238749999
460.046666666667	10	0	0.246200002
480.048333333333	10	0	0.254650012
500.05	10	0	0.257899992
520.051666666667	10	0	0.2618499995
540.055	10	0	0.265699994
560.056666666667	10	0	0.270450007
580.058333333333	10	0	0.270500012
600.06	10	0	0.270550001
620.061666666667	10	0	0.272399995
640.065	10	0	0.271949995
660.066666666667	10	0	0.2706500145
680.068333333333	10	0	0.270599991
700.07	10	0	0.271349985
720.071666666667	10	0	0.269399997
740.075	10	0	0.263849992
760.076666666667	10	0	0.2601500075
780.078333333333	10	0	0.257899985
0	9	0	0.039150007
20.0016666666667	9	0	0.0473500045
40.0033333333333	9	0	0.055799995
60.0066666666667	9	0	0.065050002
80.0083333333333	9	0	0.0759000075
100.01	9	0	0.082449991
120.011666666667	9	0	0.0936499945
140.013333333333	9	0	0.102350007
160.016666666667	9	0	0.110549998
180.018333333333	9	0	0.115549993
200.02	9	0	0.120099995
220.021666666667	9	0	0.126799997
240.025	9	0	0.1344999965
260.026666666667	9	0	0.1435999985
280.028333333333	9	0	0.1515500025
300.03	9	0	0.1574499945
320.031666666667	9	0	0.1673499865
340.033333333333	9	0	0.180899989
360.036666666667	9	0	0.1881000065
380.038333333333	9	0	0.1938499995
400.04	9	0	0.202449996
420.041666666667	9	0	0.212749992
440.045	9	0	0.2237500095
460.046666666667	9	0	0.2320500045
480.048333333333	9	0	0.237650011
500.05	9	0	0.244350005
520.051666666667	9	0	0.253049989
540.055	9	0	0.259849999
560.056666666667	9	0	0.2655000055
580.058333333333	9	0	0.2673500065
600.06	9	0	0.270849991
620.061666666667	9	0	0.274900012
640.065	9	0	0.275049992
660.066666666667	9	0	0.275300007
680.068333333333	9	0	0.276549999
700.07	9	0	0.278349995
720.071666666667	9	0	0.276700001
740.075	9	0	0.272399992
760.076666666667	9	0	0.2708000125
780.078333333333	9	0	0.2690500055
0	8	0	0.038600001
20.0016666666667	8	0	0.046300001
40.0033333333333	8	0	0.053700004
60.0066666666667	8	0	0.0598499995
80.0083333333333	8	0	0.067100003
100.01	8	0	0.0728499965
120.011666666667	8	0	0.0798499955
140.013333333333	8	0	0.0862499995
160.016666666667	8	0	0.0931999975
180.018333333333	8	0	0.0970500075
200.02	8	0	0.1018499955
220.021666666667	8	0	0.107899993
240.025	8	0	0.114900004
260.026666666667	8	0	0.122000009
280.028333333333	8	0	0.131450005
300.03	8	0	0.138550002
320.031666666667	8	0	0.1476500035
340.033333333333	8	0	0.1588499995
360.036666666667	8	0	0.172249988
380.038333333333	8	0	0.1798499965
400.04	8	0	0.1886500115
420.041666666667	8	0	0.2036500125
440.045	8	0	0.217250004
460.046666666667	8	0	0.227849994
480.048333333333	8	0	0.2376499915
500.05	8	0	0.242449999
520.051666666667	8	0	0.2554499945
540.055	8	0	0.2676500085
560.056666666667	8	0	0.2752500025
580.058333333333	8	0	0.2798500055
600.06	8	0	0.2832999895
620.061666666667	8	0	0.2923000085
640.065	8	0	0.2949000075
660.066666666667	8	0	0.2977499965
680.068333333333	8	0	0.2967500085
700.07	8	0	0.298050001
720.071666666667	8	0	0.293750003
740.075	8	0	0.2942000105
760.076666666667	8	0	0.289799988
780.078333333333	8	0	0.289200004
0	7	0	0.041499995
20.0016666666667	7	0	0.046150003
40.0033333333333	7	0	0.055899996
60.0066666666667	7	0	0.065499995
80.0083333333333	7	0	0.0733000075
100.01	7	0	0.082299996
120.011666666667	7	0	0.0906500035
140.013333333333	7	0	0.1008499975
160.016666666667	7	0	0.1097999995
180.018333333333	7	0	0.116399992
200.02	7	0	0.125399995
220.021666666667	7	0	0.1372500025
240.025	7	0	0.1517000045
260.026666666667	7	0	0.160600003
280.028333333333	7	0	0.177450008
300.03	7	0	0.1876999915
320.031666666667	7	0	0.200649992
340.033333333333	7	0	0.216449991
360.036666666667	7	0	0.229199987
380.038333333333	7	0	0.24084999
400.04	7	0	0.247650012
420.041666666667	7	0	0.264649998
440.045	7	0	0.274599996
460.046666666667	7	0	0.282299992
480.048333333333	7	0	0.296299994
500.05	7	0	0.298349999
520.051666666667	7	0	0.3050000035
540.055	7	0	0.313600011
560.056666666667	7	0	0.315600004
580.058333333333	7	0	0.3173000035
600.06	7	0	0.3171
620.061666666667	7	0	0.320100017
640.065	7	0	0.320800003
660.066666666667	7	0	0.3215
680.068333333333	7	0	0.324400004
700.07	7	0	0.3229499945
720.071666666667	7	0	0.324450001
740.075	7	0	0.3244499865
760.076666666667	7	0	0.3205499875
780.078333333333	7	0	0.324349988
0	6	0	0.0402499955
20.0016666666667	6	0	0.0476999955
40.0033333333333	6	0	0.0596999975
60.0066666666667	6	0	0.0735500085
80.0083333333333	6	0	0.085950006
100.01	6	0	0.096999999
120.011666666667	6	0	0.1104000025
140.013333333333	6	0	0.1196499945
160.016666666667	6	0	0.133099999
180.018333333333	6	0	0.142350007
200.02	6	0	0.1532500015
220.021666666667	6	0	0.1633000035
240.025	6	0	0.178649991
260.026666666667	6	0	0.188299987
280.028333333333	6	0	0.196799986
300.03	6	0	0.2049999905
320.031666666667	6	0	0.218200013
340.033333333333	6	0	0.227400008
360.036666666667	6	0	0.2385499885
380.038333333333	6	0	0.240950007
400.04	6	0	0.2530500105
420.041666666667	6	0	0.253400002
440.045	6	0	0.2593999985
460.046666666667	6	0	0.2681500015
480.048333333333	6	0	0.267449986
500.05	6	0	0.272150006
520.051666666667	6	0	0.275949985
540.055	6	0	0.2745500015
560.056666666667	6	0	0.2768499965
580.058333333333	6	0	0.2760500125
600.06	6	0	0.2803500105
620.061666666667	6	0	0.27985001
640.065	6	0	0.280549999
660.066666666667	6	0	0.2787000015
680.068333333333	6	0	0.276499987
700.07	6	0	0.2809999885
720.071666666667	6	0	0.2805999995
740.075	6	0	0.281199995
760.076666666667	6	0	0.280199997
780.078333333333	6	0	0.2767499985
0	5	0	0.0403500055
20.0016666666667	5	0	0.0466500035
40.0033333333333	5	0	0.0571000015
60.0066666666667	5	0	0.0708499955
80.0083333333333	5	0	0.0826000045
100.01	5	0	0.0924000035
120.011666666667	5	0	0.1046000015
140.013333333333	5	0	0.1127500055
160.016666666667	5	0	0.1243500075
180.018333333333	5	0	0.1301000005
200.02	5	0	0.1344000025
220.021666666667	5	0	0.14265
240.025	5	0	0.1506000015
260.026666666667	5	0	0.155149996
280.028333333333	5	0	0.162900001
300.03	5	0	0.1659000025
320.031666666667	5	0	0.176600013
340.033333333333	5	0	0.1822999935
360.036666666667	5	0	0.1883499955
380.038333333333	5	0	0.1901500145
400.04	5	0	0.199250012
420.041666666667	5	0	0.199349988
440.045	5	0	0.2038500045
460.046666666667	5	0	0.210099995
480.048333333333	5	0	0.206950001
500.05	5	0	0.2102499935
520.051666666667	5	0	0.2128
540.055	5	0	0.2125000025
560.056666666667	5	0	0.2117500045
580.058333333333	5	0	0.2125499885
600.06	5	0	0.21875
620.061666666667	5	0	0.220050007
640.065	5	0	0.2173999995
660.066666666667	5	0	0.217050005
680.068333333333	5	0	0.2160500025
700.07	5	0	0.220000006
720.071666666667	5	0	0.2172499935
740.075	5	0	0.2188500015
760.076666666667	5	0	0.217250016
780.078333333333	5	0	0.212800008
0	4	0	0.040599994
20.0016666666667	4	0	0.0449
40.0033333333333	4	0	0.051799998
60.0066666666667	4	0	0.0595999955
80.0083333333333	4	0	0.064899999
100.01	4	0	0.070849996
120.011666666667	4	0	0.077999998
140.013333333333	4	0	0.081950001
160.016666666667	4	0	0.089200009
180.018333333333	4	0	0.0932500025
200.02	4	0	0.0954999965
220.021666666667	4	0	0.101149995
240.025	4	0	0.1052000035
260.026666666667	4	0	0.109499999
280.028333333333	4	0	0.114950005
300.03	4	0	0.117600001
320.031666666667	4	0	0.122899998
340.033333333333	4	0	0.1276500035
360.036666666667	4	0	0.130750001
380.038333333333	4	0	0.133899994
400.04	4	0	0.1390000025
420.041666666667	4	0	0.1391000035
440.045	4	0	0.140450001
460.046666666667	4	0	0.141599994
480.048333333333	4	0	0.141749997
500.05	4	0	0.1420999955
520.051666666667	4	0	0.1425500035
540.055	4	0	0.1409000085
560.056666666667	4	0	0.140349999
580.058333333333	4	0	0.138850004
600.06	4	0	0.140650004
620.061666666667	4	0	0.1380999985
640.065	4	0	0.137849998
660.066666666667	4	0	0.136150003
680.068333333333	4	0	0.134749994
700.07	4	0	0.134949994
720.071666666667	4	0	0.1352499945
740.075	4	0	0.1349000005
760.076666666667	4	0	0.134199999
780.078333333333	4	0	0.1325999985
0	3	0	0.040600006
20.0016666666667	3	0	0.0422499925
40.0033333333333	3	0	0.0473499965
60.0066666666667	3	0	0.0530499965
80.0083333333333	3	0	0.059050001
100.01	3	0	0.0636999945
120.011666666667	3	0	0.069750004
140.013333333333	3	0	0.07175
160.016666666667	3	0	0.0790500085
180.018333333333	3	0	0.0800499955
200.02	3	0	0.0811999925
220.021666666667	3	0	0.0879500065
240.025	3	0	0.088199996
260.026666666667	3	0	0.0934999995
280.028333333333	3	0	0.0928999975
300.03	3	0	0.093950003
320.031666666667	3	0	0.0960500055
340.033333333333	3	0	0.0990500035
360.036666666667	3	0	0.099350002
380.038333333333	3	0	0.099249997
400.04	3	0	0.104200002
420.041666666667	3	0	0.1029500025
440.045	3	0	0.1024999995
460.046666666667	3	0	0.1013500025
480.048333333333	3	0	0.1002999915
500.05	3	0	0.1005000025
520.051666666667	3	0	0.098300007
540.055	3	0	0.096799996
560.056666666667	3	0	0.0951499975
580.058333333333	3	0	0.0927499945
600.06	3	0	0.0896000045
620.061666666667	3	0	0.088649996
640.065	3	0	0.0860499965
660.066666666667	3	0	0.085350003
680.068333333333	3	0	0.0845500005
700.07	3	0	0.081750002
720.071666666667	3	0	0.081499994
740.075	3	0	0.0845500005
760.076666666667	3	0	0.081050001
780.078333333333	3	0	0.0802000015
0	2	0	0.0433499925
20.0016666666667	2	0	0.0439499985
40.0033333333333	2	0	0.0479999925
60.0066666666667	2	0	0.0480999945
80.0083333333333	2	0	0.0548999945
100.01	2	0	0.058799993
120.011666666667	2	0	0.064600006
140.013333333333	2	0	0.068600006
160.016666666667	2	0	0.072799992
180.018333333333	2	0	0.074349996
200.02	2	0	0.077149999
220.021666666667	2	0	0.0817500025
240.025	2	0	0.082149994
260.026666666667	2	0	0.086999994
280.028333333333	2	0	0.084250007
300.03	2	0	0.0892500095
320.031666666667	2	0	0.08955
340.033333333333	2	0	0.0902000035
360.036666666667	2	0	0.0902499965
380.038333333333	2	0	0.0904500115
400.04	2	0	0.097450007
420.041666666667	2	0	0.094950009
440.045	2	0	0.0927500015
460.046666666667	2	0	0.087900001
480.048333333333	2	0	0.0882
500.05	2	0	0.088800005
520.051666666667	2	0	0.087950006
540.055	2	0	0.086250003
560.056666666667	2	0	0.084500008
580.058333333333	2	0	0.082400005
600.06	2	0	0.076399993
620.061666666667	2	0	0.0749999995
640.065	2	0	0.070250004
660.066666666667	2	0	0.0701000025
680.068333333333	2	0	0.066349995
700.07	2	0	0.066000007
720.071666666667	2	0	0.0657000055
740.075	2	0	0.0668999965
760.076666666667	2	0	0.0647500085
780.078333333333	2	0	0.062150005
0	12	0.0013	0.0428499915
20.0016666666667	12	0.0013	0.0469999945
40.0033333333333	12	0.0013	0.053950004
60.0066666666667	12	0.0013	0.0558500025
80.0083333333333	12	0.0013	0.0640500075
100.01	12	0.0013	0.066599995
120.011666666667	12	0.0013	0.0737499965
140.013333333333	12	0.0013	0.0798000055
160.016666666667	12	0.0013	0.084900006
180.018333333333	12	0.0013	0.089350004
200.02	12	0.0013	0.095500003
220.021666666667	12	0.0013	0.102149993
240.025	12	0.0013	0.107100002
260.026666666667	12	0.0013	0.112500004
280.028333333333	12	0.0013	0.118900008
300.03	12	0.0013	0.1279999985
320.031666666667	12	0.0013	0.130450007
340.033333333333	12	0.0013	0.1340500045
360.036666666667	12	0.0013	0.133650005
380.038333333333	12	0.0013	0.140399996
400.04	12	0.0013	0.1410499995
420.041666666667	12	0.0013	0.146500002
440.045	12	0.0013	0.148949999
460.046666666667	12	0.0013	0.1526000015
480.048333333333	12	0.0013	0.156000003
500.05	12	0.0013	0.1575499955
520.051666666667	12	0.0013	0.1588000055
540.055	12	0.0013	0.1605499905
560.056666666667	12	0.0013	0.159400005
580.058333333333	12	0.0013	0.158399992
600.06	12	0.0013	0.157449994
620.061666666667	12	0.0013	0.1589000035
640.065	12	0.0013	0.1564000065
660.066666666667	12	0.0013	0.1553999965
680.068333333333	12	0.0013	0.1528500015
700.07	12	0.0013	0.151999995
720.071666666667	12	0.0013	0.1479000035
740.075	12	0.0013	0.1497000045
760.076666666667	12	0.0013	0.1487499955
780.078333333333	12	0.0013	0.144250001
0	11	0.0013	0.0371499955
20.0016666666667	11	0.0013	0.044350005
40.0033333333333	11	0.0013	0.052400004
60.0066666666667	11	0.0013	0.0601000005
80.0083333333333	11	0.0013	0.0679000055
100.01	11	0.0013	0.0787499995
120.011666666667	11	0.0013	0.0878500045
140.013333333333	11	0.0013	0.098449994
160.016666666667	11	0.0013	0.1092999985
180.018333333333	11	0.0013	0.119499992
200.02	11	0.0013	0.1316499935
220.021666666667	11	0.0013	0.143299993
240.025	11	0.0013	0.149899993
260.026666666667	11	0.0013	0.1586999975
280.028333333333	11	0.0013	0.1669500055
300.03	11	0.0013	0.175949991
320.031666666667	11	0.0013	0.180899996
340.033333333333	11	0.0013	0.186599988
360.036666666667	11	0.0013	0.1886500085
380.038333333333	11	0.0013	0.1968499985
400.04	11	0.0013	0.197899997
420.041666666667	11	0.0013	0.205250006
440.045	11	0.0013	0.2072999995
460.046666666667	11	0.0013	0.2131000125
480.048333333333	11	0.0013	0.2195500055
500.05	11	0.0013	0.2209500005
520.051666666667	11	0.0013	0.2247000075
540.055	11	0.0013	0.227150004
560.056666666667	11	0.0013	0.22539999
580.058333333333	11	0.0013	0.225749995
600.06	11	0.0013	0.22840001
620.061666666667	11	0.0013	0.2286500105
640.065	11	0.0013	0.2281000055
660.066666666667	11	0.0013	0.230700005
680.068333333333	11	0.0013	0.2276500125
700.07	11	0.0013	0.2247000075
720.071666666667	11	0.0013	0.2214500115
740.075	11	0.0013	0.2197500095
760.076666666667	11	0.0013	0.2209000025
780.078333333333	11	0.0013	0.2166000045
0	10	0.0013	0.038900007
20.0016666666667	10	0.0013	0.045949996
40.0033333333333	10	0.0013	0.056749996
60.0066666666667	10	0.0013	0.069000006
80.0083333333333	10	0.0013	0.081000004
100.01	10	0.0013	0.094550006
120.011666666667	10	0.0013	0.1055499985
140.013333333333	10	0.0013	0.116599992
160.016666666667	10	0.0013	0.128699999
180.018333333333	10	0.0013	0.1374500055
200.02	10	0.0013	0.1468
220.021666666667	10	0.0013	0.1571000065
240.025	10	0.0013	0.164549999
260.026666666667	10	0.0013	0.174900002
280.028333333333	10	0.0013	0.18714999
300.03	10	0.0013	0.198350001
320.031666666667	10	0.0013	0.206799995
340.033333333333	10	0.0013	0.213900011
360.036666666667	10	0.0013	0.2212999875
380.038333333333	10	0.0013	0.232250012
400.04	10	0.0013	0.2367500105
420.041666666667	10	0.0013	0.2461499905
440.045	10	0.0013	0.254149992
460.046666666667	10	0.0013	0.260400004
480.048333333333	10	0.0013	0.268450007
500.05	10	0.0013	0.272700004
520.051666666667	10	0.0013	0.2760500015
540.055	10	0.0013	0.280500006
560.056666666667	10	0.0013	0.282749992
580.058333333333	10	0.0013	0.284100004
600.06	10	0.0013	0.28695001
620.061666666667	10	0.0013	0.288199995
640.065	10	0.0013	0.289149989
660.066666666667	10	0.0013	0.2910500015
680.068333333333	10	0.0013	0.289999992
700.07	10	0.0013	0.287049998
720.071666666667	10	0.0013	0.285100009
740.075	10	0.0013	0.281449992
760.076666666667	10	0.0013	0.2796499945
780.078333333333	10	0.0013	0.277699992
0	9	0.0013	0.039150007
20.0016666666667	9	0.0013	0.0476499945
40.0033333333333	9	0.0013	0.056200001
60.0066666666667	9	0.0013	0.066150006
80.0083333333333	9	0.0013	0.0765000025
100.01	9	0.0013	0.085249994
120.011666666667	9	0.0013	0.0960500055
140.013333333333	9	0.0013	0.104249995
160.016666666667	9	0.0013	0.10895
180.018333333333	9	0.0013	0.114649992
200.02	9	0.0013	0.120600004
220.021666666667	9	0.0013	0.128000002
240.025	9	0.0013	0.1384000035
260.026666666667	9	0.0013	0.1453999985
280.028333333333	9	0.0013	0.1568500025
300.03	9	0.0013	0.1683499845
320.031666666667	9	0.0013	0.1783499945
340.033333333333	9	0.0013	0.187100004
360.036666666667	9	0.0013	0.1985000035
380.038333333333	9	0.0013	0.2072499885
400.04	9	0.0013	0.218350012
420.041666666667	9	0.0013	0.232649986
440.045	9	0.0013	0.2434500005
460.046666666667	9	0.0013	0.2531499895
480.048333333333	9	0.0013	0.265949998
500.05	9	0.0013	0.278249997
520.051666666667	9	0.0013	0.290150006
540.055	9	0.0013	0.299050007
560.056666666667	9	0.0013	0.3018999955
580.058333333333	9	0.0013	0.3072500115
600.06	9	0.0013	0.312549997
620.061666666667	9	0.0013	0.318000011
640.065	9	0.0013	0.318750001
660.066666666667	9	0.0013	0.321499985
680.068333333333	9	0.0013	0.319850002
700.07	9	0.0013	0.316350013
720.071666666667	9	0.0013	0.317199986
740.075	9	0.0013	0.313600004
760.076666666667	9	0.0013	0.3117999915
780.078333333333	9	0.0013	0.3134499825
0	8	0.0013	0.039200004
20.0016666666667	8	0.0013	0.044700004
40.0033333333333	8	0.0013	0.0517
60.0066666666667	8	0.0013	0.0589499995
80.0083333333333	8	0.0013	0.0669
100.01	8	0.0013	0.0748500005
120.011666666667	8	0.0013	0.0832499935
140.013333333333	8	0.0013	0.0924499995
160.016666666667	8	0.0013	0.0991999955
180.018333333333	8	0.0013	0.1044499985
200.02	8	0.0013	0.1117499985
220.021666666667	8	0.0013	0.120199993
240.025	8	0.0013	0.128699999
260.026666666667	8	0.0013	0.138300002
280.028333333333	8	0.0013	0.149850003
300.03	8	0.0013	0.160949994
320.031666666667	8	0.0013	0.1707499925
340.033333333333	8	0.0013	0.1792500015
360.036666666667	8	0.0013	0.191550002
380.038333333333	8	0.0013	0.2029499855
400.04	8	0.0013	0.2169499995
420.041666666667	8	0.0013	0.2354499845
440.045	8	0.0013	0.248550013
460.046666666667	8	0.0013	0.26135001
480.048333333333	8	0.0013	0.2804500005
500.05	8	0.0013	0.294250011
520.051666666667	8	0.0013	0.3080499915
540.055	8	0.0013	0.3252499995
560.056666666667	8	0.0013	0.3276499955
580.058333333333	8	0.0013	0.3333500025
600.06	8	0.0013	0.3409000115
620.061666666667	8	0.0013	0.3472999855
640.065	8	0.0013	0.3475999905
660.066666666667	8	0.0013	0.3533500135
680.068333333333	8	0.0013	0.3467499915
700.07	8	0.0013	0.345650002
720.071666666667	8	0.0013	0.342749998
740.075	8	0.0013	0.3432000055
760.076666666667	8	0.0013	0.339100003
780.078333333333	8	0.0013	0.342499998
0	7	0.0013	0.039899997
20.0016666666667	7	0.0013	0.047250006
40.0033333333333	7	0.0013	0.056799997
60.0066666666667	7	0.0013	0.067600001
80.0083333333333	7	0.0013	0.0787999965
100.01	7	0.0013	0.090899993
120.011666666667	7	0.0013	0.1039500045
140.013333333333	7	0.0013	0.1167499985
160.016666666667	7	0.0013	0.1264999995
180.018333333333	7	0.0013	0.140000004
200.02	7	0.0013	0.154399995
220.021666666667	7	0.0013	0.1685499955
240.025	7	0.0013	0.1829999985
260.026666666667	7	0.0013	0.198699992
280.028333333333	7	0.0013	0.213849999
300.03	7	0.0013	0.2266999965
320.031666666667	7	0.0013	0.237849996
340.033333333333	7	0.0013	0.244050011
360.036666666667	7	0.0013	0.255400013
380.038333333333	7	0.0013	0.265050012
400.04	7	0.0013	0.275549993
420.041666666667	7	0.0013	0.286649983
440.045	7	0.0013	0.29570001
460.046666666667	7	0.0013	0.303
480.048333333333	7	0.0013	0.311500013
500.05	7	0.0013	0.315650009
520.051666666667	7	0.0013	0.3213999835
540.055	7	0.0013	0.32819999
560.056666666667	7	0.0013	0.330799993
580.058333333333	7	0.0013	0.3308999945
600.06	7	0.0013	0.33499999
620.061666666667	7	0.0013	0.336600013
640.065	7	0.0013	0.337700006
660.066666666667	7	0.0013	0.34060001
680.068333333333	7	0.0013	0.33849999
700.07	7	0.0013	0.3374499865
720.071666666667	7	0.0013	0.336649999
740.075	7	0.0013	0.3389500085
760.076666666667	7	0.0013	0.3355500025
780.078333333333	7	0.0013	0.336350012
0	6	0.0013	0.0409499925
20.0016666666667	6	0.0013	0.0492000055
40.0033333333333	6	0.0013	0.0609000025
60.0066666666667	6	0.0013	0.0747499985
80.0083333333333	6	0.0013	0.088949997
100.01	6	0.0013	0.105200004
120.011666666667	6	0.0013	0.1213999945
140.013333333333	6	0.0013	0.1336499935
160.016666666667	6	0.0013	0.144399996
180.018333333333	6	0.0013	0.153850008
200.02	6	0.0013	0.1626499965
220.021666666667	6	0.0013	0.1732999945
240.025	6	0.0013	0.180049985
260.026666666667	6	0.0013	0.190699998
280.028333333333	6	0.0013	0.199899994
300.03	6	0.0013	0.2065000005
320.031666666667	6	0.0013	0.215300008
340.033333333333	6	0.0013	0.221199993
360.036666666667	6	0.0013	0.2300500085
380.038333333333	6	0.0013	0.232449997
400.04	6	0.0013	0.2443499975
420.041666666667	6	0.0013	0.250900004
440.045	6	0.0013	0.2582999945
460.046666666667	6	0.0013	0.2619500155
480.048333333333	6	0.0013	0.264649998
500.05	6	0.0013	0.270150002
520.051666666667	6	0.0013	0.27305001
540.055	6	0.0013	0.2791499905
560.056666666667	6	0.0013	0.2791499905
580.058333333333	6	0.0013	0.2774500065
600.06	6	0.0013	0.2801500075
620.061666666667	6	0.0013	0.280350003
640.065	6	0.0013	0.279649999
660.066666666667	6	0.0013	0.2786000145
680.068333333333	6	0.0013	0.276600003
700.07	6	0.0013	0.2748999895
720.071666666667	6	0.0013	0.2765000045
740.075	6	0.0013	0.273200009
760.076666666667	6	0.0013	0.272700004
780.078333333333	6	0.0013	0.2720499935
0	5	0.0013	0.0405499935
20.0016666666667	5	0.0013	0.0485500065
40.0033333333333	5	0.0013	0.0581999905
60.0066666666667	5	0.0013	0.0701499995
80.0083333333333	5	0.0013	0.0827000065
100.01	5	0.0013	0.0970000065
120.011666666667	5	0.0013	0.1078999975
140.013333333333	5	0.0013	0.1157499965
160.016666666667	5	0.0013	0.1240500025
180.018333333333	5	0.0013	0.1270999945
200.02	5	0.0013	0.1303999945
220.021666666667	5	0.0013	0.136849992
240.025	5	0.0013	0.1455999915
260.026666666667	5	0.0013	0.150749996
280.028333333333	5	0.0013	0.155400008
300.03	5	0.0013	0.1615000025
320.031666666667	5	0.0013	0.166399989
340.033333333333	5	0.0013	0.1730999865
360.036666666667	5	0.0013	0.1823500135
380.038333333333	5	0.0013	0.1830499995
400.04	5	0.0013	0.191150009
420.041666666667	5	0.0013	0.19565
440.045	5	0.0013	0.2035499845
460.046666666667	5	0.0013	0.206299991
480.048333333333	5	0.0013	0.207249991
500.05	5	0.0013	0.2102499935
520.051666666667	5	0.0013	0.213600013
540.055	5	0.0013	0.2186999885
560.056666666667	5	0.0013	0.2186499875
580.058333333333	5	0.0013	0.2175500135
600.06	5	0.0013	0.218349993
620.061666666667	5	0.0013	0.221150011
640.065	5	0.0013	0.2203999905
660.066666666667	5	0.0013	0.219950009
680.068333333333	5	0.0013	0.2174499965
700.07	5	0.0013	0.214899994
720.071666666667	5	0.0013	0.2162500055
740.075	5	0.0013	0.2151499835
760.076666666667	5	0.0013	0.211149987
780.078333333333	5	0.0013	0.214200001
0	4	0.0013	0.040499992
20.0016666666667	4	0.0013	0.045599997
40.0033333333333	4	0.0013	0.050500006
60.0066666666667	4	0.0013	0.0566000045
80.0083333333333	4	0.0013	0.062799994
100.01	4	0.0013	0.070350003
120.011666666667	4	0.0013	0.076400001
140.013333333333	4	0.0013	0.08185
160.016666666667	4	0.0013	0.085500006
180.018333333333	4	0.0013	0.0886499995
200.02	4	0.0013	0.0911999985
220.021666666667	4	0.0013	0.095849994
240.025	4	0.0013	0.1006000005
260.026666666667	4	0.0013	0.104899995
280.028333333333	4	0.0013	0.107349995
300.03	4	0.0013	0.112099997
320.031666666667	4	0.0013	0.114899997
340.033333333333	4	0.0013	0.1211499985
360.036666666667	4	0.0013	0.127350003
380.038333333333	4	0.0013	0.127699993
400.04	4	0.0013	0.1332999955
420.041666666667	4	0.0013	0.1355000025
440.045	4	0.0013	0.139150009
460.046666666667	4	0.0013	0.139500003
480.048333333333	4	0.0013	0.140650008
500.05	4	0.0013	0.1427000055
520.051666666667	4	0.0013	0.1435500055
540.055	4	0.0013	0.1445000095
560.056666666667	4	0.0013	0.145150006
580.058333333333	4	0.0013	0.142650009
600.06	4	0.0013	0.141750008
620.061666666667	4	0.0013	0.1429000055
640.065	4	0.0013	0.13975
660.066666666667	4	0.0013	0.138150007
680.068333333333	4	0.0013	0.137549996
700.07	4	0.0013	0.136149999
720.071666666667	4	0.0013	0.1348500025
740.075	4	0.0013	0.1345000085
760.076666666667	4	0.0013	0.132299997
780.078333333333	4	0.0013	0.1339000055
0	3	0.0013	0.038000006
20.0016666666667	3	0.0013	0.0405499935
40.0033333333333	3	0.0013	0.0447499975
60.0066666666667	3	0.0013	0.0480500015
80.0083333333333	3	0.0013	0.054750003
100.01	3	0.0013	0.0610999945
120.011666666667	3	0.0013	0.065649994
140.013333333333	3	0.0013	0.069450006
160.016666666667	3	0.0013	0.0754500065
180.018333333333	3	0.0013	0.0774499965
200.02	3	0.0013	0.0792000035
220.021666666667	3	0.0013	0.0825500045
240.025	3	0.0013	0.083799996
260.026666666667	3	0.0013	0.0877999925
280.028333333333	3	0.0013	0.0889000035
300.03	3	0.0013	0.090450003
320.031666666667	3	0.0013	0.0939499995
340.033333333333	3	0.0013	0.0960499975
360.036666666667	3	0.0013	0.098650005
380.038333333333	3	0.0013	0.097750001
400.04	3	0.0013	0.103300002
420.041666666667	3	0.0013	0.1009499985
440.045	3	0.0013	0.1009000025
460.046666666667	3	0.0013	0.0999499935
480.048333333333	3	0.0013	0.0997999985
500.05	3	0.0013	0.1015000045
520.051666666667	3	0.0013	0.097799998
540.055	3	0.0013	0.097400006
560.056666666667	3	0.0013	0.0941499955
580.058333333333	3	0.0013	0.0925499905
600.06	3	0.0013	0.0898999945
620.061666666667	3	0.0013	0.089150004
640.065	3	0.0013	0.0854500005
660.066666666667	3	0.0013	0.083450001
680.068333333333	3	0.0013	0.0821500045
700.07	3	0.0013	0.080649998
720.071666666667	3	0.0013	0.078999997
740.075	3	0.0013	0.0800499985
760.076666666667	3	0.0013	0.079049997
780.078333333333	3	0.0013	0.0788999945
0	2	0.0013	0.0383499975
20.0016666666667	2	0.0013	0.0390499905
40.0033333333333	2	0.0013	0.0412999985
60.0066666666667	2	0.0013	0.0425000045
80.0083333333333	2	0.0013	0.0502000035
100.01	2	0.0013	0.056099992
120.011666666667	2	0.0013	0.060200006
140.013333333333	2	0.0013	0.064599998
160.016666666667	2	0.0013	0.071999993
180.018333333333	2	0.0013	0.070749994
200.02	2	0.0013	0.073549997
220.021666666667	2	0.0013	0.0780499995
240.025	2	0.0013	0.07635
260.026666666667	2	0.0013	0.082499992
280.028333333333	2	0.0013	0.082450006
300.03	2	0.0013	0.0858500115
320.031666666667	2	0.0013	0.088950005
340.033333333333	2	0.0013	0.0884000025
360.036666666667	2	0.0013	0.0937499965
380.038333333333	2	0.0013	0.0908500035
400.04	2	0.0013	0.099750001
420.041666666667	2	0.0013	0.094050009
440.045	2	0.0013	0.0930499915
460.046666666667	2	0.0013	0.089100007
480.048333333333	2	0.0013	0.089499992
500.05	2	0.0013	0.090000011
520.051666666667	2	0.0013	0.088349998
540.055	2	0.0013	0.083450001
560.056666666667	2	0.0013	0.079200007
580.058333333333	2	0.0013	0.079600003
600.06	2	0.0013	0.074500006
620.061666666667	2	0.0013	0.0716000015
640.065	2	0.0013	0.067949995
660.066666666667	2	0.0013	0.0667000045
680.068333333333	2	0.0013	0.064150002
700.07	2	0.0013	0.063400007
720.071666666667	2	0.0013	0.0636000005
740.075	2	0.0013	0.0639000045
760.076666666667	2	0.0013	0.0600500035
780.078333333333	2	0.0013	0.058350001
0	12	0.013	0.0470500035
20.0016666666667	12	0.013	0.0448000025
40.0033333333333	12	0.013	0.056650005
60.0066666666667	12	0.013	0.0597499945
80.0083333333333	12	0.013	0.0644499995
100.01	12	0.013	0.065500006
120.011666666667	12	0.013	0.0715500045
140.013333333333	12	0.013	0.0748999975
160.016666666667	12	0.013	0.079099997
180.018333333333	12	0.013	0.081550006
200.02	12	0.013	0.084800001
220.021666666667	12	0.013	0.087650001
240.025	12	0.013	0.091300003
260.026666666667	12	0.013	0.094200007
280.028333333333	12	0.013	0.097400002
300.03	12	0.013	0.0993000045
320.031666666667	12	0.013	0.101749998
340.033333333333	12	0.013	0.1052499935
360.036666666667	12	0.013	0.106849998
380.038333333333	12	0.013	0.108699996
400.04	12	0.013	0.1103500015
420.041666666667	12	0.013	0.112100001
440.045	12	0.013	0.113050003
460.046666666667	12	0.013	0.1135999965
480.048333333333	12	0.013	0.115199998
500.05	12	0.013	0.1164500005
520.051666666667	12	0.013	0.1168999965
540.055	12	0.013	0.1161499995
560.056666666667	12	0.013	0.114400003
580.058333333333	12	0.013	0.114300005
600.06	12	0.013	0.113649998
620.061666666667	12	0.013	0.1128999995
640.065	12	0.013	0.1119999995
660.066666666667	12	0.013	0.1096999975
680.068333333333	12	0.013	0.1107500045
700.07	12	0.013	0.108400002
720.071666666667	12	0.013	0.1081000005
740.075	12	0.013	0.1063000005
760.076666666667	12	0.013	0.1060500035
780.078333333333	12	0.013	0.10455
0	11	0.013	0.0383500015
20.0016666666667	11	0.013	0.04665
40.0033333333333	11	0.013	0.055299994
60.0066666666667	11	0.013	0.0613000055
80.0083333333333	11	0.013	0.0655999965
100.01	11	0.013	0.0663499975
120.011666666667	11	0.013	0.0718500015
140.013333333333	11	0.013	0.075849999
160.016666666667	11	0.013	0.0798000055
180.018333333333	11	0.013	0.083100002
200.02	11	0.013	0.0863500015
220.021666666667	11	0.013	0.09
240.025	11	0.013	0.092300001
260.026666666667	11	0.013	0.0961999975
280.028333333333	11	0.013	0.0990500035
300.03	11	0.013	0.102349997
320.031666666667	11	0.013	0.104600001
340.033333333333	11	0.013	0.107300002
360.036666666667	11	0.013	0.1098500005
380.038333333333	11	0.013	0.1120499935
400.04	11	0.013	0.113100007
420.041666666667	11	0.013	0.114849996
440.045	11	0.013	0.1169000045
460.046666666667	11	0.013	0.1178000085
480.048333333333	11	0.013	0.1188499995
500.05	11	0.013	0.1208500045
520.051666666667	11	0.013	0.1199000065
540.055	11	0.013	0.119449999
560.056666666667	11	0.013	0.119199995
580.058333333333	11	0.013	0.118850004
600.06	11	0.013	0.117599998
620.061666666667	11	0.013	0.1164500045
640.065	11	0.013	0.1156999945
660.066666666667	11	0.013	0.114500005
680.068333333333	11	0.013	0.1133500005
700.07	11	0.013	0.1123999985
720.071666666667	11	0.013	0.1115499995
740.075	11	0.013	0.1100499995
760.076666666667	11	0.013	0.1095999965
780.078333333333	11	0.013	0.1083000045
0	10	0.013	0.038900007
20.0016666666667	10	0.013	0.048749999
40.0033333333333	10	0.013	0.057350006
60.0066666666667	10	0.013	0.064999997
80.0083333333333	10	0.013	0.068500001
100.01	10	0.013	0.068150006
120.011666666667	10	0.013	0.0733500045
140.013333333333	10	0.013	0.077800006
160.016666666667	10	0.013	0.082899999
180.018333333333	10	0.013	0.0854500045
200.02	10	0.013	0.090199996
220.021666666667	10	0.013	0.0934000015
240.025	10	0.013	0.096749998
260.026666666667	10	0.013	0.100100003
280.028333333333	10	0.013	0.103149999
300.03	10	0.013	0.106350008
320.031666666667	10	0.013	0.108600002
340.033333333333	10	0.013	0.111899998
360.036666666667	10	0.013	0.1141000055
380.038333333333	10	0.013	0.116350003
400.04	10	0.013	0.1186499925
420.041666666667	10	0.013	0.1201500035
440.045	10	0.013	0.121950004
460.046666666667	10	0.013	0.123000003
480.048333333333	10	0.013	0.123950005
500.05	10	0.013	0.124299995
520.051666666667	10	0.013	0.1237500015
540.055	10	0.013	0.124400001
560.056666666667	10	0.013	0.123950001
580.058333333333	10	0.013	0.123499997
600.06	10	0.013	0.122249994
620.061666666667	10	0.013	0.120799992
640.065	10	0.013	0.119449992
660.066666666667	10	0.013	0.1179500075
680.068333333333	10	0.013	0.117400006
700.07	10	0.013	0.116149996
720.071666666667	10	0.013	0.1164
740.075	10	0.013	0.114050005
760.076666666667	10	0.013	0.1125499975
780.078333333333	10	0.013	0.112000003
0	9	0.013	0.038350001
20.0016666666667	9	0.013	0.0458499935
40.0033333333333	9	0.013	0.055599991
60.0066666666667	9	0.013	0.063649993
80.0083333333333	9	0.013	0.0674999985
100.01	9	0.013	0.06625
120.011666666667	9	0.013	0.0716499945
140.013333333333	9	0.013	0.076450001
160.016666666667	9	0.013	0.080449995
180.018333333333	9	0.013	0.083849993
200.02	9	0.013	0.0878
220.021666666667	9	0.013	0.091000002
240.025	9	0.013	0.0944999905
260.026666666667	9	0.013	0.0974999925
280.028333333333	9	0.013	0.1007499915
300.03	9	0.013	0.1037499945
320.031666666667	9	0.013	0.1056500005
340.033333333333	9	0.013	0.109500002
360.036666666667	9	0.013	0.1117999965
380.038333333333	9	0.013	0.1138500015
400.04	9	0.013	0.116050009
420.041666666667	9	0.013	0.117149998
440.045	9	0.013	0.1180499935
460.046666666667	9	0.013	0.1197499965
480.048333333333	9	0.013	0.120350007
500.05	9	0.013	0.120250005
520.051666666667	9	0.013	0.121250008
540.055	9	0.013	0.121449996
560.056666666667	9	0.013	0.1207999995
580.058333333333	9	0.013	0.1203500065
600.06	9	0.013	0.119350005
620.061666666667	9	0.013	0.117899991
640.065	9	0.013	0.116550006
660.066666666667	9	0.013	0.115700003
680.068333333333	9	0.013	0.114850003
700.07	9	0.013	0.112849995
720.071666666667	9	0.013	0.112400006
740.075	9	0.013	0.111599997
760.076666666667	9	0.013	0.1106999995
780.078333333333	9	0.013	0.1096499895
0	8	0.013	0.037999999
20.0016666666667	8	0.013	0.046500005
40.0033333333333	8	0.013	0.054299999
60.0066666666667	8	0.013	0.0629499925
80.0083333333333	8	0.013	0.066699996
100.01	8	0.013	0.0663500055
120.011666666667	8	0.013	0.0705500025
140.013333333333	8	0.013	0.0752499915
160.016666666667	8	0.013	0.0789999955
180.018333333333	8	0.013	0.0822499955
200.02	8	0.013	0.0858499925
220.021666666667	8	0.013	0.089200004
240.025	8	0.013	0.092499997
260.026666666667	8	0.013	0.095600009
280.028333333333	8	0.013	0.098750003
300.03	8	0.013	0.101750005
320.031666666667	8	0.013	0.1042499985
340.033333333333	8	0.013	0.1071500035
360.036666666667	8	0.013	0.109349996
380.038333333333	8	0.013	0.1114500015
400.04	8	0.013	0.1140500005
420.041666666667	8	0.013	0.1154499945
440.045	8	0.013	0.117149994
460.046666666667	8	0.013	0.118250001
480.048333333333	8	0.013	0.1188499925
500.05	8	0.013	0.118550002
520.051666666667	8	0.013	0.1195500045
540.055	8	0.013	0.1192499995
560.056666666667	8	0.013	0.1190499955
580.058333333333	8	0.013	0.1185500025
600.06	8	0.013	0.1174999995
620.061666666667	8	0.013	0.1160000045
640.065	8	0.013	0.1151000035
660.066666666667	8	0.013	0.1142500045
680.068333333333	8	0.013	0.1125500055
700.07	8	0.013	0.111849994
720.071666666667	8	0.013	0.111049995
740.075	8	0.013	0.1098000035
760.076666666667	8	0.013	0.109200001
780.078333333333	8	0.013	0.108100008
0	7	0.013	0.038599998
20.0016666666667	7	0.013	0.04775
40.0033333333333	7	0.013	0.055300001
60.0066666666667	7	0.013	0.064599995
80.0083333333333	7	0.013	0.0690999965
100.01	7	0.013	0.070300002
120.011666666667	7	0.013	0.0744499975
140.013333333333	7	0.013	0.0794500075
160.016666666667	7	0.013	0.0838000065
180.018333333333	7	0.013	0.086899999
200.02	7	0.013	0.090799991
220.021666666667	7	0.013	0.0945499945
240.025	7	0.013	0.0976999995
260.026666666667	7	0.013	0.101500001
280.028333333333	7	0.013	0.104250006
300.03	7	0.013	0.1078999975
320.031666666667	7	0.013	0.11135
340.033333333333	7	0.013	0.113749996
360.036666666667	7	0.013	0.115999993
380.038333333333	7	0.013	0.118149999
400.04	7	0.013	0.120749995
420.041666666667	7	0.013	0.121949997
440.045	7	0.013	0.123900008
460.046666666667	7	0.013	0.125099998
480.048333333333	7	0.013	0.125599995
500.05	7	0.013	0.125950001
520.051666666667	7	0.013	0.1262000015
540.055	7	0.013	0.125500001
560.056666666667	7	0.013	0.125400003
580.058333333333	7	0.013	0.1251999995
600.06	7	0.013	0.123500001
620.061666666667	7	0.013	0.122000001
640.065	7	0.013	0.120900002
660.066666666667	7	0.013	0.120200005
680.068333333333	7	0.013	0.119100001
700.07	7	0.013	0.1170499955
720.071666666667	7	0.013	0.116349995
740.075	7	0.013	0.1154499945
760.076666666667	7	0.013	0.1147500055
780.078333333333	7	0.013	0.113749999
0	6	0.013	0.0394499975
20.0016666666667	6	0.013	0.0476000085
40.0033333333333	6	0.013	0.0553999995
60.0066666666667	6	0.013	0.0626500025
80.0083333333333	6	0.013	0.069150005
100.01	6	0.013	0.070299994
120.011666666667	6	0.013	0.0746000075
140.013333333333	6	0.013	0.0792499965
160.016666666667	6	0.013	0.083699997
180.018333333333	6	0.013	0.088450003
200.02	6	0.013	0.0916500015
220.021666666667	6	0.013	0.0956000055
240.025	6	0.013	0.099150002
260.026666666667	6	0.013	0.102000002
280.028333333333	6	0.013	0.104999997
300.03	6	0.013	0.1083000075
320.031666666667	6	0.013	0.111499995
340.033333333333	6	0.013	0.114500004
360.036666666667	6	0.013	0.1171500045
380.038333333333	6	0.013	0.118949998
400.04	6	0.013	0.1216500065
420.041666666667	6	0.013	0.123
440.045	6	0.013	0.1245999965
460.046666666667	6	0.013	0.1254499995
480.048333333333	6	0.013	0.126049991
500.05	6	0.013	0.126850005
520.051666666667	6	0.013	0.127149999
540.055	6	0.013	0.1272499965
560.056666666667	6	0.013	0.1262499945
580.058333333333	6	0.013	0.1253499945
600.06	6	0.013	0.1242500055
620.061666666667	6	0.013	0.122250009
640.065	6	0.013	0.121550005
660.066666666667	6	0.013	0.1204000035
680.068333333333	6	0.013	0.1188
700.07	6	0.013	0.1184999945
720.071666666667	6	0.013	0.1172999925
740.075	6	0.013	0.116100002
760.076666666667	6	0.013	0.115300007
780.078333333333	6	0.013	0.1140500005
0	5	0.013	0.0393500035
20.0016666666667	5	0.013	0.0454499985
40.0033333333333	5	0.013	0.0522999945
60.0066666666667	5	0.013	0.0591499915
80.0083333333333	5	0.013	0.0660000075
100.01	5	0.013	0.0687000045
120.011666666667	5	0.013	0.0716999955
140.013333333333	5	0.013	0.0760499945
160.016666666667	5	0.013	0.0802500065
180.018333333333	5	0.013	0.0839999945
200.02	5	0.013	0.0875999995
220.021666666667	5	0.013	0.091449998
240.025	5	0.013	0.0948999975
260.026666666667	5	0.013	0.096650004
280.028333333333	5	0.013	0.100600004
300.03	5	0.013	0.1035999915
320.031666666667	5	0.013	0.105600003
340.033333333333	5	0.013	0.1107000035
360.036666666667	5	0.013	0.1117499955
380.038333333333	5	0.013	0.1141499945
400.04	5	0.013	0.11665
420.041666666667	5	0.013	0.117849995
440.045	5	0.013	0.1193500045
460.046666666667	5	0.013	0.120200008
480.048333333333	5	0.013	0.120850004
500.05	5	0.013	0.1214499955
520.051666666667	5	0.013	0.121300001
540.055	5	0.013	0.1231999955
560.056666666667	5	0.013	0.1213499935
580.058333333333	5	0.013	0.1200500015
600.06	5	0.013	0.119450003
620.061666666667	5	0.013	0.117750004
640.065	5	0.013	0.1178999995
660.066666666667	5	0.013	0.116450001
680.068333333333	5	0.013	0.1146499995
700.07	5	0.013	0.114300005
720.071666666667	5	0.013	0.1123500055
740.075	5	0.013	0.1113499995
760.076666666667	5	0.013	0.109950003
780.078333333333	5	0.013	0.109700006
0	4	0.013	0.039500005
20.0016666666667	4	0.013	0.044100002
40.0033333333333	4	0.013	0.049799994
60.0066666666667	4	0.013	0.0571999995
80.0083333333333	4	0.013	0.064599994
100.01	4	0.013	0.067750004
120.011666666667	4	0.013	0.070300002
140.013333333333	4	0.013	0.074150004
160.016666666667	4	0.013	0.077799995
180.018333333333	4	0.013	0.0810500055
200.02	4	0.013	0.0841999985
220.021666666667	4	0.013	0.088149998
240.025	4	0.013	0.0906999965
260.026666666667	4	0.013	0.093599998
280.028333333333	4	0.013	0.096450004
300.03	4	0.013	0.099599994
320.031666666667	4	0.013	0.102000002
340.033333333333	4	0.013	0.1048500055
360.036666666667	4	0.013	0.107450009
380.038333333333	4	0.013	0.108900003
400.04	4	0.013	0.1111000075
420.041666666667	4	0.013	0.1122999975
440.045	4	0.013	0.113550008
460.046666666667	4	0.013	0.114299994
480.048333333333	4	0.013	0.114950005
500.05	4	0.013	0.1157999975
520.051666666667	4	0.013	0.1159500005
540.055	4	0.013	0.1162000075
560.056666666667	4	0.013	0.115150005
580.058333333333	4	0.013	0.114250005
600.06	4	0.013	0.113849998
620.061666666667	4	0.013	0.1133999975
640.065	4	0.013	0.111850005
660.066666666667	4	0.013	0.111049995
680.068333333333	4	0.013	0.109850004
700.07	4	0.013	0.108749997
720.071666666667	4	0.013	0.1082499995
740.075	4	0.013	0.1063999945
760.076666666667	4	0.013	0.106200002
780.078333333333	4	0.013	0.1055000015
0	3	0.013	0.040899996
20.0016666666667	3	0.013	0.0452499985
40.0033333333333	3	0.013	0.0492499995
60.0066666666667	3	0.013	0.0555500095
80.0083333333333	3	0.013	0.063750006
100.01	3	0.013	0.0663999955
120.011666666667	3	0.013	0.070249997
140.013333333333	3	0.013	0.072549999
160.016666666667	3	0.013	0.0771500055
180.018333333333	3	0.013	0.0796500035
200.02	3	0.013	0.0828000045
220.021666666667	3	0.013	0.0877500025
240.025	3	0.013	0.088900007
260.026666666667	3	0.013	0.0928000025
280.028333333333	3	0.013	0.0944999945
300.03	3	0.013	0.095049992
320.031666666667	3	0.013	0.1011500025
340.033333333333	3	0.013	0.1016500035
360.036666666667	3	0.013	0.105550002
380.038333333333	3	0.013	0.106349997
400.04	3	0.013	0.109999996
420.041666666667	3	0.013	0.1123499985
440.045	3	0.013	0.1120999975
460.046666666667	3	0.013	0.1121499915
480.048333333333	3	0.013	0.1138999985
500.05	3	0.013	0.1156000045
520.051666666667	3	0.013	0.115099993
540.055	3	0.013	0.115299996
560.056666666667	3	0.013	0.1135499965
580.058333333333	3	0.013	0.1134500015
600.06	3	0.013	0.1114000005
620.061666666667	3	0.013	0.112250008
640.065	3	0.013	0.1098499965
660.066666666667	3	0.013	0.108749997
680.068333333333	3	0.013	0.1082499995
700.07	3	0.013	0.106650006
720.071666666667	3	0.013	0.107800007
740.075	3	0.013	0.1075500025
760.076666666667	3	0.013	0.10475
780.078333333333	3	0.013	0.1045999975
0	2	0.013	0.0478499945
20.0016666666667	2	0.013	0.0481499955
40.0033333333333	2	0.013	0.0497999935
60.0066666666667	2	0.013	0.0553999995
80.0083333333333	2	0.013	0.0644999925
100.01	2	0.013	0.065600004
120.011666666667	2	0.013	0.069800004
140.013333333333	2	0.013	0.070699997
160.016666666667	2	0.013	0.077000003
180.018333333333	2	0.013	0.078849997
200.02	2	0.013	0.080649998
220.021666666667	2	0.013	0.0870500025
240.025	2	0.013	0.088050004
260.026666666667	2	0.013	0.09
280.028333333333	2	0.013	0.091050003
300.03	2	0.013	0.0967500025
320.031666666667	2	0.013	0.099149998
340.033333333333	2	0.013	0.0976999965
360.036666666667	2	0.013	0.1049500075
380.038333333333	2	0.013	0.1054500125
400.04	2	0.013	0.109850008
420.041666666667	2	0.013	0.110750008
440.045	2	0.013	0.1078500035
460.046666666667	2	0.013	0.107899997
480.048333333333	2	0.013	0.109699991
500.05	2	0.013	0.111700005
520.051666666667	2	0.013	0.112350002
540.055	2	0.013	0.113550003
560.056666666667	2	0.013	0.110800006
580.058333333333	2	0.013	0.111500006
600.06	2	0.013	0.106800001
620.061666666667	2	0.013	0.1094000005
640.065	2	0.013	0.106549993
660.066666666667	2	0.013	0.1056999935
680.068333333333	2	0.013	0.106450003
700.07	2	0.013	0.103199996
720.071666666667	2	0.013	0.1039999985
740.075	2	0.013	0.1071000065
760.076666666667	2	0.013	0.1030500005
780.078333333333	2	0.013	0.098649997
0	12	0.13	0.0433500005
20.0016666666667	12	0.13	0.0454999995
40.0033333333333	12	0.13	0.052649997
60.0066666666667	12	0.13	0.0591499995
80.0083333333333	12	0.13	0.0606499945
100.01	12	0.13	0.062700004
120.011666666667	12	0.13	0.0672500055
140.013333333333	12	0.13	0.0707000005
160.016666666667	12	0.13	0.073899999
180.018333333333	12	0.13	0.074949999
200.02	12	0.13	0.078800004
220.021666666667	12	0.13	0.081049994
240.025	12	0.13	0.084400005
260.026666666667	12	0.13	0.087700002
280.028333333333	12	0.13	0.088399999
300.03	12	0.13	0.0908999965
320.031666666667	12	0.13	0.095649999
340.033333333333	12	0.13	0.0965499955
360.036666666667	12	0.13	0.100250006
380.038333333333	12	0.13	0.100400004
400.04	12	0.13	0.1038499955
420.041666666667	12	0.13	0.106399994
440.045	12	0.13	0.106449995
460.046666666667	12	0.13	0.1080000065
480.048333333333	12	0.13	0.109400004
500.05	12	0.13	0.1113500035
520.051666666667	12	0.13	0.1121000045
540.055	12	0.13	0.1123499945
560.056666666667	12	0.13	0.112399999
580.058333333333	12	0.13	0.111799993
600.06	12	0.13	0.110949997
620.061666666667	12	0.13	0.1110999995
640.065	12	0.13	0.1103000005
660.066666666667	12	0.13	0.1084999925
680.068333333333	12	0.13	0.1076499965
700.07	12	0.13	0.107899994
720.071666666667	12	0.13	0.1067999935
740.075	12	0.13	0.1056000035
760.076666666667	12	0.13	0.1055499945
780.078333333333	12	0.13	0.104249995
0	11	0.13	0.0388499945
20.0016666666667	11	0.13	0.047449998
40.0033333333333	11	0.13	0.053400006
60.0066666666667	11	0.13	0.0605999935
80.0083333333333	11	0.13	0.0581000035
100.01	11	0.13	0.0622500035
120.011666666667	11	0.13	0.0665500015
140.013333333333	11	0.13	0.070050005
160.016666666667	11	0.13	0.0736000055
180.018333333333	11	0.13	0.076100003
200.02	11	0.13	0.0786499905
220.021666666667	11	0.13	0.081699994
240.025	11	0.13	0.08459999
260.026666666667	11	0.13	0.0885000005
280.028333333333	11	0.13	0.0898499975
300.03	11	0.13	0.092749998
320.031666666667	11	0.13	0.095399994
340.033333333333	11	0.13	0.097899992
360.036666666667	11	0.13	0.1007499955
380.038333333333	11	0.13	0.1027499995
400.04	11	0.13	0.104399994
420.041666666667	11	0.13	0.105950009
440.045	11	0.13	0.1082000065
460.046666666667	11	0.13	0.1097000055
480.048333333333	11	0.13	0.1111500035
500.05	11	0.13	0.1122500075
520.051666666667	11	0.13	0.1127000035
540.055	11	0.13	0.112949993
560.056666666667	11	0.13	0.113299999
580.058333333333	11	0.13	0.112949993
600.06	11	0.13	0.112800006
620.061666666667	11	0.13	0.1125499975
640.065	11	0.13	0.1116000005
660.066666666667	11	0.13	0.110399995
680.068333333333	11	0.13	0.1093500065
700.07	11	0.13	0.1090000005
720.071666666667	11	0.13	0.1078499965
740.075	11	0.13	0.1074500005
760.076666666667	11	0.13	0.1068999955
780.078333333333	11	0.13	0.1052999985
0	10	0.13	0.039800007
20.0016666666667	10	0.13	0.047849998
40.0033333333333	10	0.13	0.055149999
60.0066666666667	10	0.13	0.061299994
80.0083333333333	10	0.13	0.059700001
100.01	10	0.13	0.062750004
120.011666666667	10	0.13	0.0673500075
140.013333333333	10	0.13	0.070800006
160.016666666667	10	0.13	0.074799996
180.018333333333	10	0.13	0.0780499985
200.02	10	0.13	0.081299994
220.021666666667	10	0.13	0.0846000015
240.025	10	0.13	0.088649995
260.026666666667	10	0.13	0.093100003
280.028333333333	10	0.13	0.094749991
300.03	10	0.13	0.097649995
320.031666666667	10	0.13	0.100000005
340.033333333333	10	0.13	0.1032
360.036666666667	10	0.13	0.1056999975
380.038333333333	10	0.13	0.107550003
400.04	10	0.13	0.1098499935
420.041666666667	10	0.13	0.1120500005
440.045	10	0.13	0.113549996
460.046666666667	10	0.13	0.115299992
480.048333333333	10	0.13	0.116549999
500.05	10	0.13	0.117299996
520.051666666667	10	0.13	0.1168500035
540.055	10	0.13	0.117799994
560.056666666667	10	0.13	0.11894999
580.058333333333	10	0.13	0.118600004
600.06	10	0.13	0.117849994
620.061666666667	10	0.13	0.116900001
640.065	10	0.13	0.116849992
660.066666666667	10	0.13	0.1148499995
680.068333333333	10	0.13	0.114000008
700.07	10	0.13	0.113549996
720.071666666667	10	0.13	0.112499993
740.075	10	0.13	0.111749996
760.076666666667	10	0.13	0.1105499935
780.078333333333	10	0.13	0.110100001
0	9	0.13	0.038850002
20.0016666666667	9	0.13	0.0462500005
40.0033333333333	9	0.13	0.053199995
60.0066666666667	9	0.13	0.059850004
80.0083333333333	9	0.13	0.0562000015
100.01	9	0.13	0.059649993
120.011666666667	9	0.13	0.0650500025
140.013333333333	9	0.13	0.069249998
160.016666666667	9	0.13	0.072950002
180.018333333333	9	0.13	0.076249998
200.02	9	0.13	0.079399992
220.021666666667	9	0.13	0.082799997
240.025	9	0.13	0.0870999985
260.026666666667	9	0.13	0.0906999965
280.028333333333	9	0.13	0.0911499935
300.03	9	0.13	0.0937500035
320.031666666667	9	0.13	0.0962500045
340.033333333333	9	0.13	0.100199994
360.036666666667	9	0.13	0.1027000055
380.038333333333	9	0.13	0.1049499995
400.04	9	0.13	0.107250009
420.041666666667	9	0.13	0.108850006
440.045	9	0.13	0.1099500055
460.046666666667	9	0.13	0.1117499955
480.048333333333	9	0.13	0.112649996
500.05	9	0.13	0.112450007
520.051666666667	9	0.13	0.114150007
540.055	9	0.13	0.114750002
560.056666666667	9	0.13	0.1157000025
580.058333333333	9	0.13	0.1153499965
600.06	9	0.13	0.114850003
620.061666666667	9	0.13	0.113200001
640.065	9	0.13	0.113149993
660.066666666667	9	0.13	0.112599995
680.068333333333	9	0.13	0.111350004
700.07	9	0.13	0.110049993
720.071666666667	9	0.13	0.109700005
740.075	9	0.13	0.108999997
760.076666666667	9	0.13	0.1084000055
780.078333333333	9	0.13	0.1078500035
0	8	0.13	0.037999999
20.0016666666667	8	0.13	0.045799993
40.0033333333333	8	0.13	0.053099994
60.0066666666667	8	0.13	0.0593499905
80.0083333333333	8	0.13	0.056299999
100.01	8	0.13	0.0601500045
120.011666666667	8	0.13	0.0658499965
140.013333333333	8	0.13	0.0702499965
160.016666666667	8	0.13	0.0728999965
180.018333333333	8	0.13	0.0759500075
200.02	8	0.13	0.0786499895
220.021666666667	8	0.13	0.083000004
240.025	8	0.13	0.085999991
260.026666666667	8	0.13	0.089000002
280.028333333333	8	0.13	0.089549996
300.03	8	0.13	0.09265
320.031666666667	8	0.13	0.0948500035
340.033333333333	8	0.13	0.0976500065
360.036666666667	8	0.13	0.102149993
380.038333333333	8	0.13	0.1023499965
400.04	8	0.13	0.1044500025
420.041666666667	8	0.13	0.1063500045
440.045	8	0.13	0.107649997
460.046666666667	8	0.13	0.109450001
480.048333333333	8	0.13	0.1108499915
500.05	8	0.13	0.110449999
520.051666666667	8	0.13	0.1118499935
540.055	8	0.13	0.1126500065
560.056666666667	8	0.13	0.1122499995
580.058333333333	8	0.13	0.1123500015
600.06	8	0.13	0.1119999955
620.061666666667	8	0.13	0.1118000075
640.065	8	0.13	0.1107000035
660.066666666667	8	0.13	0.1099500055
680.068333333333	8	0.13	0.1088500025
700.07	8	0.13	0.108050004
720.071666666667	8	0.13	0.107349992
740.075	8	0.13	0.1064999925
760.076666666667	8	0.13	0.107600003
780.078333333333	8	0.13	0.104899999
0	7	0.13	0.037999995
20.0016666666667	7	0.13	0.04685
40.0033333333333	7	0.13	0.055599991
60.0066666666667	7	0.13	0.061299999
80.0083333333333	7	0.13	0.0592999945
100.01	7	0.13	0.063099999
120.011666666667	7	0.13	0.0694500025
140.013333333333	7	0.13	0.0739500035
160.016666666667	7	0.13	0.0768999935
180.018333333333	7	0.13	0.080200005
200.02	7	0.13	0.083500001
220.021666666667	7	0.13	0.0868499985
240.025	7	0.13	0.0903999955
260.026666666667	7	0.13	0.093700003
280.028333333333	7	0.13	0.09775
300.03	7	0.13	0.0988999935
320.031666666667	7	0.13	0.101349995
340.033333333333	7	0.13	0.104350001
360.036666666667	7	0.13	0.107499998
380.038333333333	7	0.13	0.109849993
400.04	7	0.13	0.112049997
420.041666666667	7	0.13	0.11335
440.045	7	0.13	0.114800003
460.046666666667	7	0.13	0.116900008
480.048333333333	7	0.13	0.118100002
500.05	7	0.13	0.11885
520.051666666667	7	0.13	0.1197999975
540.055	7	0.13	0.120500006
560.056666666667	7	0.13	0.120400008
580.058333333333	7	0.13	0.1221000065
600.06	7	0.13	0.119599994
620.061666666667	7	0.13	0.119500004
640.065	7	0.13	0.118699994
660.066666666667	7	0.13	0.117700007
680.068333333333	7	0.13	0.116500002
700.07	7	0.13	0.1149500055
720.071666666667	7	0.13	0.115549997
740.075	7	0.13	0.1140500005
760.076666666667	7	0.13	0.1136500015
780.078333333333	7	0.13	0.112250004
0	6	0.13	0.0386499985
20.0016666666667	6	0.13	0.0485000085
40.0033333333333	6	0.13	0.0557000045
60.0066666666667	6	0.13	0.0629500075
80.0083333333333	6	0.13	0.059350003
100.01	6	0.13	0.064399998
120.011666666667	6	0.13	0.0698000005
140.013333333333	6	0.13	0.0733500015
160.016666666667	6	0.13	0.077100005
180.018333333333	6	0.13	0.07945
200.02	6	0.13	0.0831500065
220.021666666667	6	0.13	0.0865000005
240.025	6	0.13	0.090450003
260.026666666667	6	0.13	0.092099998
280.028333333333	6	0.13	0.095399998
300.03	6	0.13	0.0977000065
320.031666666667	6	0.13	0.101099997
340.033333333333	6	0.13	0.104199994
360.036666666667	6	0.13	0.1069499965
380.038333333333	6	0.13	0.108949993
400.04	6	0.13	0.1113499965
420.041666666667	6	0.13	0.113500003
440.045	6	0.13	0.1150999995
460.046666666667	6	0.13	0.1156499985
480.048333333333	6	0.13	0.117050003
500.05	6	0.13	0.118150007
520.051666666667	6	0.13	0.118450001
540.055	6	0.13	0.1192499955
560.056666666667	6	0.13	0.1202499975
580.058333333333	6	0.13	0.1197500045
600.06	6	0.13	0.1193499975
620.061666666667	6	0.13	0.117650006
640.065	6	0.13	0.117449995
660.066666666667	6	0.13	0.1168000025
680.068333333333	6	0.13	0.114999995
700.07	6	0.13	0.1149999945
720.071666666667	6	0.13	0.1138999945
740.075	6	0.13	0.112900007
760.076666666667	6	0.13	0.112799995
780.078333333333	6	0.13	0.1117500065
0	5	0.13	0.0383500015
20.0016666666667	5	0.13	0.0456500015
40.0033333333333	5	0.13	0.0522999945
60.0066666666667	5	0.13	0.0582499915
80.0083333333333	5	0.13	0.0564000085
100.01	5	0.13	0.0645999945
120.011666666667	5	0.13	0.0664999975
140.013333333333	5	0.13	0.0697500075
160.016666666667	5	0.13	0.0727499985
180.018333333333	5	0.13	0.0757999905
200.02	5	0.13	0.0785999965
220.021666666667	5	0.13	0.082050003
240.025	5	0.13	0.0864000025
260.026666666667	5	0.13	0.087549999
280.028333333333	5	0.13	0.090800002
300.03	5	0.13	0.0929000035
320.031666666667	5	0.13	0.095699999
340.033333333333	5	0.13	0.0992999895
360.036666666667	5	0.13	0.1020499955
380.038333333333	5	0.13	0.1042500065
400.04	5	0.13	0.105949998
420.041666666667	5	0.13	0.108149994
440.045	5	0.13	0.1098499935
460.046666666667	5	0.13	0.110100001
480.048333333333	5	0.13	0.111349992
500.05	5	0.13	0.1123500055
520.051666666667	5	0.13	0.112800006
540.055	5	0.13	0.1140000035
560.056666666667	5	0.13	0.1149500045
580.058333333333	5	0.13	0.1143499945
600.06	5	0.13	0.115250006
620.061666666667	5	0.13	0.113350004
640.065	5	0.13	0.1123000085
660.066666666667	5	0.13	0.112549994
680.068333333333	5	0.13	0.1106500065
700.07	5	0.13	0.110299997
720.071666666667	5	0.13	0.1089499925
740.075	5	0.13	0.1081499905
760.076666666667	5	0.13	0.106949997
780.078333333333	5	0.13	0.106800001
0	4	0.13	0.039099998
20.0016666666667	4	0.13	0.043899998
40.0033333333333	4	0.13	0.050600007
60.0066666666667	4	0.13	0.0566000045
80.0083333333333	4	0.13	0.056699995
100.01	4	0.13	0.062350001
120.011666666667	4	0.13	0.066200007
140.013333333333	4	0.13	0.070049994
160.016666666667	4	0.13	0.072000001
180.018333333333	4	0.13	0.0735499975
200.02	4	0.13	0.0764000005
220.021666666667	4	0.13	0.079650003
240.025	4	0.13	0.0831000015
260.026666666667	4	0.13	0.083799996
280.028333333333	4	0.13	0.087149996
300.03	4	0.13	0.089600004
320.031666666667	4	0.13	0.092500005
340.033333333333	4	0.13	0.0941500025
360.036666666667	4	0.13	0.096850008
380.038333333333	4	0.13	0.099200002
400.04	4	0.13	0.1015999955
420.041666666667	4	0.13	0.1029000015
440.045	4	0.13	0.103450001
460.046666666667	4	0.13	0.104699995
480.048333333333	4	0.13	0.106649999
500.05	4	0.13	0.1074000035
520.051666666667	4	0.13	0.1078499975
540.055	4	0.13	0.1085999985
560.056666666667	4	0.13	0.109349996
580.058333333333	4	0.13	0.108549998
600.06	4	0.13	0.107649997
620.061666666667	4	0.13	0.1071999975
640.065	4	0.13	0.106450003
660.066666666667	4	0.13	0.105849996
680.068333333333	4	0.13	0.104450002
700.07	4	0.13	0.104050007
720.071666666667	4	0.13	0.1034499925
740.075	4	0.13	0.1019000075
760.076666666667	4	0.13	0.102700002
780.078333333333	4	0.13	0.1009999995
0	3	0.13	0.039199997
20.0016666666667	3	0.13	0.0447500055
40.0033333333333	3	0.13	0.0515499935
60.0066666666667	3	0.13	0.0560500025
80.0083333333333	3	0.13	0.058350004
100.01	3	0.13	0.0644999925
120.011666666667	3	0.13	0.068249993
140.013333333333	3	0.13	0.069450006
160.016666666667	3	0.13	0.0722499975
180.018333333333	3	0.13	0.0729499945
200.02	3	0.13	0.0765000025
220.021666666667	3	0.13	0.0794499965
240.025	3	0.13	0.081899993
260.026666666667	3	0.13	0.0816000065
280.028333333333	3	0.13	0.0856000075
300.03	3	0.13	0.08585
320.031666666667	3	0.13	0.0880500045
340.033333333333	3	0.13	0.0906499955
360.036666666667	3	0.13	0.093849998
380.038333333333	3	0.13	0.095549993
400.04	3	0.13	0.100499999
420.041666666667	3	0.13	0.1000499985
440.045	3	0.13	0.0988999985
460.046666666667	3	0.13	0.0999499935
480.048333333333	3	0.13	0.1014999975
500.05	3	0.13	0.1042000055
520.051666666667	3	0.13	0.104400006
540.055	3	0.13	0.104400005
560.056666666667	3	0.13	0.1050500015
580.058333333333	3	0.13	0.1052499975
600.06	3	0.13	0.1037000045
620.061666666667	3	0.13	0.104150005
640.065	3	0.13	0.1012500005
660.066666666667	3	0.13	0.101050001
680.068333333333	3	0.13	0.1000499945
700.07	3	0.13	0.098949995
720.071666666667	3	0.13	0.099000007
740.075	3	0.13	0.0995500015
760.076666666667	3	0.13	0.099149995
780.078333333333	3	0.13	0.0972000065
0	2	0.13	0.0447500015
20.0016666666667	2	0.13	0.0477500035
40.0033333333333	2	0.13	0.0525999965
60.0066666666667	2	0.13	0.0555000005
80.0083333333333	2	0.13	0.0618999935
100.01	2	0.13	0.068599995
120.011666666667	2	0.13	0.070900008
140.013333333333	2	0.13	0.071100004
160.016666666667	2	0.13	0.074499991
180.018333333333	2	0.13	0.072649997
200.02	2	0.13	0.074749988
220.021666666667	2	0.13	0.0781500005
240.025	2	0.13	0.081549999
260.026666666667	2	0.13	0.083699998
280.028333333333	2	0.13	0.085349996
300.03	2	0.13	0.0865500085
320.031666666667	2	0.13	0.090049993
340.033333333333	2	0.13	0.0879999955
360.036666666667	2	0.13	0.0938499975
380.038333333333	2	0.13	0.0955500085
400.04	2	0.13	0.101650003
420.041666666667	2	0.13	0.102249999
440.045	2	0.13	0.0940499935
460.046666666667	2	0.13	0.096599999
480.048333333333	2	0.13	0.101500001
500.05	2	0.13	0.101000003
520.051666666667	2	0.13	0.10255
540.055	2	0.13	0.100849997
560.056666666667	2	0.13	0.102700003
580.058333333333	2	0.13	0.104200002
600.06	2	0.13	0.101999995
620.061666666667	2	0.13	0.1010000075
640.065	2	0.13	0.097149998
660.066666666667	2	0.13	0.0977999945
680.068333333333	2	0.13	0.096249994
700.07	2	0.13	0.097899995
720.071666666667	2	0.13	0.0976999965
740.075	2	0.13	0.0967000085
760.076666666667	2	0.13	0.0966499965
780.078333333333	2	0.13	0.092950005
0	12	1.3	0.0397499985
20.0016666666667	12	1.3	0.0447000005
40.0033333333333	12	1.3	0.050949998
60.0066666666667	12	1.3	0.0533499905
80.0083333333333	12	1.3	0.0578500065
100.01	12	1.3	0.059900001
120.011666666667	12	1.3	0.0622499955
140.013333333333	12	1.3	0.0646000015
160.016666666667	12	1.3	0.064899995
180.018333333333	12	1.3	0.068050001
200.02	12	1.3	0.072099995
220.021666666667	12	1.3	0.073750004
240.025	12	1.3	0.076999999
260.026666666667	12	1.3	0.078699998
280.028333333333	12	1.3	0.0823
300.03	12	1.3	0.0836999935
320.031666666667	12	1.3	0.085849997
340.033333333333	12	1.3	0.0884500065
360.036666666667	12	1.3	0.091650009
380.038333333333	12	1.3	0.092700008
400.04	12	1.3	0.0973500045
420.041666666667	12	1.3	0.098000001
440.045	12	1.3	0.099950004
460.046666666667	12	1.3	0.0999000035
480.048333333333	12	1.3	0.101899996
500.05	12	1.3	0.1024500015
520.051666666667	12	1.3	0.1031000015
540.055	12	1.3	0.1039500015
560.056666666667	12	1.3	0.103499997
580.058333333333	12	1.3	0.104500003
600.06	12	1.3	0.102750007
620.061666666667	12	1.3	0.1052999905
640.065	12	1.3	0.1016000025
660.066666666667	12	1.3	0.1016999965
680.068333333333	12	1.3	0.1004499945
700.07	12	1.3	0.101600006
720.071666666667	12	1.3	0.0998999965
740.075	12	1.3	0.0990999975
760.076666666667	12	1.3	0.0981500035
780.078333333333	12	1.3	0.097449999
0	11	1.3	0.0355499985
20.0016666666667	11	1.3	0.04405
40.0033333333333	11	1.3	0.050700005
60.0066666666667	11	1.3	0.0564999985
80.0083333333333	11	1.3	0.0564000045
100.01	11	1.3	0.0629500005
120.011666666667	11	1.3	0.0641500055
140.013333333333	11	1.3	0.067049999
160.016666666667	11	1.3	0.0703999955
180.018333333333	11	1.3	0.073500004
200.02	11	1.3	0.0754499955
220.021666666667	11	1.3	0.078600001
240.025	11	1.3	0.0808
260.026666666667	11	1.3	0.0845000075
280.028333333333	11	1.3	0.0872499975
300.03	11	1.3	0.089949995
320.031666666667	11	1.3	0.092500005
340.033333333333	11	1.3	0.095399994
360.036666666667	11	1.3	0.0982499975
380.038333333333	11	1.3	0.1010500005
400.04	11	1.3	0.102300003
420.041666666667	11	1.3	0.104150008
440.045	11	1.3	0.1061000005
460.046666666667	11	1.3	0.1074999985
480.048333333333	11	1.3	0.1088499945
500.05	11	1.3	0.1101500025
520.051666666667	11	1.3	0.1108000015
540.055	11	1.3	0.111449998
560.056666666667	11	1.3	0.110900003
580.058333333333	11	1.3	0.111349996
600.06	11	1.3	0.110499997
620.061666666667	11	1.3	0.1102500035
640.065	11	1.3	0.1096999975
660.066666666667	11	1.3	0.108599994
680.068333333333	11	1.3	0.1072500015
700.07	11	1.3	0.1070999985
720.071666666667	11	1.3	0.1062499985
740.075	11	1.3	0.1057500015
760.076666666667	11	1.3	0.1049999935
780.078333333333	11	1.3	0.1037000005
0	10	1.3	0.037100006
20.0016666666667	10	1.3	0.046849996
40.0033333333333	10	1.3	0.052750003
60.0066666666667	10	1.3	0.0581
80.0083333333333	10	1.3	0.055999998
100.01	10	1.3	0.064350002
120.011666666667	10	1.3	0.0653500035
140.013333333333	10	1.3	0.068499997
160.016666666667	10	1.3	0.071199995
180.018333333333	10	1.3	0.0738500025
200.02	10	1.3	0.076799993
220.021666666667	10	1.3	0.0803000025
240.025	10	1.3	0.08275
260.026666666667	10	1.3	0.087099991
280.028333333333	10	1.3	0.089749996
300.03	10	1.3	0.092950005
320.031666666667	10	1.3	0.095099997
340.033333333333	10	1.3	0.097300004
360.036666666667	10	1.3	0.1002999955
380.038333333333	10	1.3	0.102649994
400.04	10	1.3	0.1053500065
420.041666666667	10	1.3	0.1073499955
440.045	10	1.3	0.109149996
460.046666666667	10	1.3	0.109999992
480.048333333333	10	1.3	0.111550003
500.05	10	1.3	0.112500004
520.051666666667	10	1.3	0.1120499975
540.055	10	1.3	0.113299992
560.056666666667	10	1.3	0.114350002
580.058333333333	10	1.3	0.114400007
600.06	10	1.3	0.113950003
620.061666666667	10	1.3	0.113199998
640.065	10	1.3	0.111849997
660.066666666667	10	1.3	0.1107500045
680.068333333333	10	1.3	0.110100001
700.07	10	1.3	0.109650005
720.071666666667	10	1.3	0.108399998
740.075	10	1.3	0.107750002
760.076666666667	10	1.3	0.1062499955
780.078333333333	10	1.3	0.105900004
0	9	1.3	0.036349997
20.0016666666667	9	1.3	0.0445500015
40.0033333333333	9	1.3	0.050699998
60.0066666666667	9	1.3	0.056450006
80.0083333333333	9	1.3	0.0554000025
100.01	9	1.3	0.059549991
120.011666666667	9	1.3	0.0631499995
140.013333333333	9	1.3	0.066250007
160.016666666667	9	1.3	0.069149997
180.018333333333	9	1.3	0.071649995
200.02	9	1.3	0.0746
220.021666666667	9	1.3	0.077100005
240.025	9	1.3	0.0802000015
260.026666666667	9	1.3	0.0827999975
280.028333333333	9	1.3	0.0856500045
300.03	9	1.3	0.0889499965
320.031666666667	9	1.3	0.0909500045
340.033333333333	9	1.3	0.094099995
360.036666666667	9	1.3	0.0968999975
380.038333333333	9	1.3	0.0994499965
400.04	9	1.3	0.101850007
420.041666666667	9	1.3	0.103450004
440.045	9	1.3	0.1044500015
460.046666666667	9	1.3	0.1065499965
480.048333333333	9	1.3	0.107750002
500.05	9	1.3	0.107850004
520.051666666667	9	1.3	0.109450002
540.055	9	1.3	0.110049997
560.056666666667	9	1.3	0.1104000025
580.058333333333	9	1.3	0.1102499995
600.06	9	1.3	0.110049996
620.061666666667	9	1.3	0.109099992
640.065	9	1.3	0.108249999
660.066666666667	9	1.3	0.1076
680.068333333333	9	1.3	0.106549997
700.07	9	1.3	0.105250001
720.071666666667	9	1.3	0.105100002
740.075	9	1.3	0.104100004
760.076666666667	9	1.3	0.1037000005
780.078333333333	9	1.3	0.1026499905
0	8	1.3	0.0372
20.0016666666667	8	1.3	0.044900007
40.0033333333333	8	1.3	0.051199991
60.0066666666667	8	1.3	0.0572500005
80.0083333333333	8	1.3	0.056400001
100.01	8	1.3	0.0605499965
120.011666666667	8	1.3	0.0655499915
140.013333333333	8	1.3	0.0672499905
160.016666666667	8	1.3	0.0705000015
180.018333333333	8	1.3	0.0732500065
200.02	8	1.3	0.0767500025
220.021666666667	8	1.3	0.079699993
240.025	8	1.3	0.082499992
260.026666666667	8	1.3	0.08510001
280.028333333333	8	1.3	0.087949999
300.03	8	1.3	0.091250006
320.031666666667	8	1.3	0.0943499955
340.033333333333	8	1.3	0.0973500015
360.036666666667	8	1.3	0.100349993
380.038333333333	8	1.3	0.1035500015
400.04	8	1.3	0.1060499995
420.041666666667	8	1.3	0.1076499965
440.045	8	1.3	0.108850002
460.046666666667	8	1.3	0.110849995
480.048333333333	8	1.3	0.1119499945
500.05	8	1.3	0.112049997
520.051666666667	8	1.3	0.1141500025
540.055	8	1.3	0.1150500025
560.056666666667	8	1.3	0.1146499955
580.058333333333	8	1.3	0.1154499945
600.06	8	1.3	0.1136999945
620.061666666667	8	1.3	0.1132000015
640.065	8	1.3	0.1127999945
660.066666666667	8	1.3	0.1119499955
680.068333333333	8	1.3	0.1105500015
700.07	8	1.3	0.109349996
720.071666666667	8	1.3	0.108850002
740.075	8	1.3	0.1081000045
760.076666666667	8	1.3	0.107999995
780.078333333333	8	1.3	0.1067
0	7	1.3	0.036299996
20.0016666666667	7	1.3	0.047150005
40.0033333333333	7	1.3	0.054500002
60.0066666666667	7	1.3	0.060099993
80.0083333333333	7	1.3	0.0609000065
100.01	7	1.3	0.064100001
120.011666666667	7	1.3	0.0670500065
140.013333333333	7	1.3	0.0705500055
160.016666666667	7	1.3	0.0740000045
180.018333333333	7	1.3	0.076699991
200.02	7	1.3	0.080000002
220.021666666667	7	1.3	0.0832499975
240.025	7	1.3	0.0859999955
260.026666666667	7	1.3	0.089099999
280.028333333333	7	1.3	0.091850005
300.03	7	1.3	0.0941000015
320.031666666667	7	1.3	0.09815
340.033333333333	7	1.3	0.100950003
360.036666666667	7	1.3	0.103799995
380.038333333333	7	1.3	0.106649998
400.04	7	1.3	0.109049991
420.041666666667	7	1.3	0.110349994
440.045	7	1.3	0.113000002
460.046666666667	7	1.3	0.114399996
480.048333333333	7	1.3	0.115400001
500.05	7	1.3	0.116550006
520.051666666667	7	1.3	0.1176999915
540.055	7	1.3	0.118600004
560.056666666667	7	1.3	0.118899998
580.058333333333	7	1.3	0.1187000085
600.06	7	1.3	0.118500005
620.061666666667	7	1.3	0.118099995
640.065	7	1.3	0.116900008
660.066666666667	7	1.3	0.117199999
680.068333333333	7	1.3	0.115199994
700.07	7	1.3	0.1135499965
720.071666666667	7	1.3	0.112749994
740.075	7	1.3	0.1126500065
760.076666666667	7	1.3	0.1119500025
[truncated: 1,521 more rows]
