# Supplementary material for: Ratiometric quorum sensing governs the trade-off between bacterial vertical and horizontal antibiotic resistance propagation
Source: PLoS Biol. 2020 Aug 14;18(8):e3000814. doi: 10.1371/journal.pbio.3000814 (PMC7449403; doi:10.1371/journal.pbio.3000814)
Supplement: S14 Data — (CSV) [file pbio.3000814.s022.csv]

d	fd	kind	k	theta	a	r50	p50	hue	maxdatk	ratio	lk
0.0101264769417004	0.0162700640720723	0	1	0.5	NA	NA	NA	Ratio-sensing (theta = 0.5)	0.0110641315376999	0.915252761339239	0
0.0101264769258945	0.01627006404652	0	1	0.111111111111111	NA	NA	NA	Ratio-sensing (theta = 0.11)	0.0110641315376999	0.915252759910666	0
0.0101264769266186	0.0162700640476905	0	1	0.428571428571429	NA	NA	NA	Ratio-sensing (theta = 0.43)	0.0110641315376999	0.915252759976114	0
0.0101384693293922	0.0162894515144244	0	1	1	NA	NA	NA	Ratio-sensing (theta = 1.0)	0.0110641315376999	0.91633665912651	0
0.0104388086838397	0.0167750887593974	0	1	2.33333333333333	NA	NA	NA	Ratio-sensing (theta = 2.3)	0.0110641315376999	0.943481975812602	0
0.0108613513203034	0.0174586337418897	0	1	9	NA	NA	NA	Ratio-sensing (theta = 9.0)	0.0110641315376999	0.981672287905694	0
6.33296592041397e-15	1.01030295240889e-14	1	1	NA	0	NA	NA	Constitutive activation (a = 0.0)	0.0110641315376999	5.72387077904399e-13	0
8.3210911222749e-15	1.33226762955019e-14	1	1	NA	0.25	NA	NA	Constitutive activation (a = 0.25)	0.0110641315376999	7.52078108789796e-13	0
9.19499476164845e-14	1.46771483855446e-13	1	1	NA	0.5	NA	NA	Constitutive activation (a = 0.5)	0.0110641315376999	8.31063398904597e-12	0
-3.20746237945694e-12	-5.12234699101555e-12	1	1	NA	0.75	NA	NA	Constitutive activation (a = 0.75)	0.0110641315376999	-2.89897346983613e-10	0
0.0101264769258945	0.01627006404652	1	1	NA	1	NA	NA	Constitutive activation (a = 1.0)	0.0110641315376999	0.915252759910666	0
0.0105463579059127	0.0169490361756084	2	1	NA	NA	0.01	NA	Recipients-density-sensing (r50 = 0.01)	0.0110641315376999	0.953202505770746	0
0.0110641315376999	0.0177867991403307	2	1	NA	NA	0.1	NA	Recipients-density-sensing (r50 = 0.1)	0.0110641315376999	1	0
6.29309251378699e-15	1.01030295240889e-14	2	1	NA	NA	1	NA	Recipients-density-sensing (r50 = 1.0)	0.0110641315376999	5.6878323367215e-13	0
6.33296592041397e-15	1.01030295240889e-14	2	1	NA	NA	10	NA	Recipients-density-sensing (r50 = 1e+01)	0.0110641315376999	5.72387077904399e-13	0
6.33296592041397e-15	1.01030295240889e-14	2	1	NA	NA	100	NA	Recipients-density-sensing (r50 = 1e+02)	0.0110641315376999	5.72387077904399e-13	0
0.0104460089458854	0.0167867335502541	3	1	NA	NA	NA	0.01	Population-size-sensing (p50 = 0.01)	0.0110641315376999	0.944132750979296	0
0.0110574979872597	0.017776062538548	3	1	NA	NA	NA	0.1	Population-size-sensing (p50 = 0.1)	0.0110641315376999	0.999400445446836	0
6.29625674071171e-15	1.01030295240889e-14	3	1	NA	NA	NA	1	Population-size-sensing (p50 = 1.0)	0.0110641315376999	5.69069223305764e-13	0
6.33296592041397e-15	1.01030295240889e-14	3	1	NA	NA	NA	10	Population-size-sensing (p50 = 1e+01)	0.0110641315376999	5.72387077904399e-13	0
6.33296592041397e-15	1.01030295240889e-14	3	1	NA	NA	NA	100	Population-size-sensing (p50 = 1e+02)	0.0110641315376999	5.72387077904399e-13	0
0.218161517777093	0.291581182899039	0	1.37382379588326	0.5	NA	NA	NA	Ratio-sensing (theta = 0.5)	0.218161517818823	0.999999999808718	0.137931034482759
0.218161517777099	0.29158118289905	0	1.37382379588326	0.111111111111111	NA	NA	NA	Ratio-sensing (theta = 0.11)	0.218161517818823	0.999999999808747	0.137931034482759
0.218161517777099	0.291581182899049	0	1.37382379588326	0.428571428571429	NA	NA	NA	Ratio-sensing (theta = 0.43)	0.218161517818823	0.999999999808746	0.137931034482759
0.218161511176097	0.291581171912945	0	1.37382379588326	1	NA	NA	NA	Ratio-sensing (theta = 1.0)	0.218161517818823	0.999999969551337	0.137931034482759
0.203446759347844	0.267716012002484	0	1.37382379588326	2.33333333333333	NA	NA	NA	Ratio-sensing (theta = 2.3)	0.218161517818823	0.932551081335989	0.137931034482759
0.0788804965430561	0.0950712311895372	0	1.37382379588326	9	NA	NA	NA	Ratio-sensing (theta = 9.0)	0.218161517818823	0.361569250762933	0.137931034482759
-7.39023307616448e-14	-8.59312621059871e-14	1	1.37382379588326	NA	0	NA	NA	Constitutive activation (a = 0.0)	0.218161517818823	-3.38750534468772e-13	0.137931034482759
1.19302003401486e-14	1.37667655053519e-14	1	1.37382379588326	NA	0.25	NA	NA	Constitutive activation (a = 0.25)	0.218161517818823	5.46851729829652e-14	0.137931034482759
-8.87105139435799e-13	-1.03117514527185e-12	1	1.37382379588326	NA	0.5	NA	NA	Constitutive activation (a = 0.5)	0.218161517818823	-4.06627689569209e-12	0.137931034482759
0.0753123149769401	0.0906028222853298	1	1.37382379588326	NA	0.75	NA	NA	Constitutive activation (a = 0.75)	0.218161517818823	0.345213563463951	0.137931034482759
0.218161517777099	0.29158118289905	1	1.37382379588326	NA	1	NA	NA	Constitutive activation (a = 1.0)	0.218161517818823	0.999999999808747	0.137931034482759
0.21816151775871	0.291581182866882	2	1.37382379588326	NA	NA	0.01	NA	Recipients-density-sensing (r50 = 0.01)	0.218161517818823	0.999999999724456	0.137931034482759
0.218161517807776	0.291581182952014	2	1.37382379588326	NA	NA	0.1	NA	Recipients-density-sensing (r50 = 0.1)	0.218161517818823	0.999999999949363	0.137931034482759
3.90233392903075e-14	4.52970994047064e-14	2	1.37382379588326	NA	NA	1	NA	Recipients-density-sensing (r50 = 1.0)	0.218161517818823	1.78873614744078e-13	0.137931034482759
-7.39023307616448e-14	-8.59312621059871e-14	2	1.37382379588326	NA	NA	10	NA	Recipients-density-sensing (r50 = 1e+01)	0.218161517818823	-3.38750534468772e-13	0.137931034482759
-7.39023307616448e-14	-8.59312621059871e-14	2	1.37382379588326	NA	NA	100	NA	Recipients-density-sensing (r50 = 1e+02)	0.218161517818823	-3.38750534468772e-13	0.137931034482759
0.218161517818823	0.29158118297115	3	1.37382379588326	NA	NA	NA	0.01	Population-size-sensing (p50 = 0.01)	0.218161517818823	1	0.137931034482759
0.218161517766547	0.29158118287984	3	1.37382379588326	NA	NA	NA	0.1	Population-size-sensing (p50 = 0.1)	0.218161517818823	0.999999999760379	0.137931034482759
3.90299883318934e-14	4.54081217071689e-14	3	1.37382379588326	NA	NA	NA	1	Population-size-sensing (p50 = 1.0)	0.218161517818823	1.78904092353752e-13	0.137931034482759
-7.39023307616448e-14	-8.59312621059871e-14	3	1.37382379588326	NA	NA	NA	10	Population-size-sensing (p50 = 1e+01)	0.218161517818823	-3.38750534468772e-13	0.137931034482759
-7.39023307616448e-14	-8.59312621059871e-14	3	1.37382379588326	NA	NA	NA	100	Population-size-sensing (p50 = 1e+02)	0.218161517818823	-3.38750534468772e-13	0.137931034482759
0.430088552788907	0.489644722622126	0	1.8873918221351	0.5	NA	NA	NA	Ratio-sensing (theta = 0.5)	0.43008860732234	0.999999873204191	0.275862068965517
0.43008860732234	0.489644876604149	0	1.8873918221351	0.111111111111111	NA	NA	NA	Ratio-sensing (theta = 0.11)	0.43008860732234	1	0.275862068965517
0.430088604823538	0.489644869548462	0	1.8873918221351	0.428571428571429	NA	NA	NA	Ratio-sensing (theta = 0.43)	0.43008860732234	0.999999994190031	0.275862068965517
0.420416109410605	0.465613746159867	0	1.8873918221351	1	NA	NA	NA	Ratio-sensing (theta = 1.0)	0.43008860732234	0.977510453085576	0.275862068965517
0.303021754102261	0.292243530308685	0	1.8873918221351	2.33333333333333	NA	NA	NA	Ratio-sensing (theta = 2.3)	0.43008860732234	0.704556570304951	0.275862068965517
0.113354965076113	0.0994770566969554	0	1.8873918221351	9	NA	NA	NA	Ratio-sensing (theta = 9.0)	0.43008860732234	0.263561887355823	0.275862068965517
1.75526704139095e-15	1.55431223447522e-15	1	1.8873918221351	NA	0	NA	NA	Constitutive activation (a = 0.0)	0.43008860732234	4.08117539387745e-15	0.275862068965517
9.6309448010573e-14	8.14903700074865e-14	1	1.8873918221351	NA	0.25	NA	NA	Constitutive activation (a = 0.25)	0.43008860732234	2.23929316821898e-13	0.275862068965517
0.0527044075157904	0.0453073309838312	1	1.8873918221351	NA	0.5	NA	NA	Constitutive activation (a = 0.5)	0.43008860732234	0.122543137898768	0.275862068965517
0.352938928866681	0.354691733713641	1	1.8873918221351	NA	0.75	NA	NA	Constitutive activation (a = 0.75)	0.43008860732234	0.820619106988257	0.275862068965517
0.43008860732234	0.489644876604149	1	1.8873918221351	NA	1	NA	NA	Constitutive activation (a = 1.0)	0.43008860732234	1	0.275862068965517
0.430088607321019	0.489644876627815	2	1.8873918221351	NA	NA	0.01	NA	Recipients-density-sensing (r50 = 0.01)	0.43008860732234	0.99999999999693	0.275862068965517
0.430088607319862	0.489644876624372	2	1.8873918221351	NA	NA	0.1	NA	Recipients-density-sensing (r50 = 0.1)	0.43008860732234	0.999999999994239	0.275862068965517
0.126607856919056	0.111655613704993	2	1.8873918221351	NA	NA	1	NA	Recipients-density-sensing (r50 = 1.0)	0.43008860732234	0.294376216350617	0.275862068965517
1.75526704139095e-15	1.55431223447522e-15	2	1.8873918221351	NA	NA	10	NA	Recipients-density-sensing (r50 = 1e+01)	0.43008860732234	4.08117539387745e-15	0.275862068965517
1.75526704139095e-15	1.55431223447522e-15	2	1.8873918221351	NA	NA	100	NA	Recipients-density-sensing (r50 = 1e+02)	0.43008860732234	4.08117539387745e-15	0.275862068965517
0.430088607320819	0.489644876627317	3	1.8873918221351	NA	NA	NA	0.01	Population-size-sensing (p50 = 0.01)	0.43008860732234	0.999999999996465	0.275862068965517
0.430088607320811	0.48964487662786	3	1.8873918221351	NA	NA	NA	0.1	Population-size-sensing (p50 = 0.1)	0.43008860732234	0.999999999996445	0.275862068965517
0.302004965939109	0.291053555128409	3	1.8873918221351	NA	NA	NA	1	Population-size-sensing (p50 = 1.0)	0.43008860732234	0.702192433832046	0.275862068965517
1.75526704139095e-15	1.55431223447522e-15	3	1.8873918221351	NA	NA	NA	10	Population-size-sensing (p50 = 1e+01)	0.43008860732234	4.08117539387745e-15	0.275862068965517
1.75526704139095e-15	1.55431223447522e-15	3	1.8873918221351	NA	NA	NA	100	Population-size-sensing (p50 = 1e+02)	0.43008860732234	4.08117539387745e-15	0.275862068965517
0.640223391244514	0.626819287810197	0	2.59294379740467	0.5	NA	NA	NA	Ratio-sensing (theta = 0.5)	0.644877570096886	0.992782848918637	0.413793103448276
0.637444921321388	0.633814525142246	0	2.59294379740467	0.111111111111111	NA	NA	NA	Ratio-sensing (theta = 0.11)	0.644877570096886	0.988474325794304	0.413793103448276
0.637690555539044	0.63326613826584	0	2.59294379740467	0.428571428571429	NA	NA	NA	Ratio-sensing (theta = 0.43)	0.644877570096886	0.988855226338913	0.413793103448276
0.607638605843358	0.491777352537731	0	2.59294379740467	1	NA	NA	NA	Ratio-sensing (theta = 1.0)	0.644877570096886	0.942254210752077	0.413793103448276
0.429090190353178	0.301000513027874	0	2.59294379740467	2.33333333333333	NA	NA	NA	Ratio-sensing (theta = 2.3)	0.644877570096886	0.665382407840161	0.413793103448276
0.160169084068179	0.102319760542253	0	2.59294379740467	9	NA	NA	NA	Ratio-sensing (theta = 9.0)	0.644877570096886	0.248371305648164	0.413793103448276
8.61701907951082e-15	5.32907051820075e-15	1	2.59294379740467	NA	0	NA	NA	Constitutive activation (a = 0.0)	0.644877570096886	1.33622558437196e-14	0.413793103448276
-3.02186267754955e-12	-1.86117787848161e-12	1	2.59294379740467	NA	0.25	NA	NA	Constitutive activation (a = 0.25)	0.644877570096886	-4.68594787239313e-12	0.413793103448276
0.467957306956065	0.335016734906116	1	2.59294379740467	NA	0.5	NA	NA	Constitutive activation (a = 0.5)	0.644877570096886	0.725652943528117	0.413793103448276
0.635362513519029	0.546917931809554	1	2.59294379740467	NA	0.75	NA	NA	Constitutive activation (a = 0.75)	0.644877570096886	0.985245173628186	0.413793103448276
0.637444921321388	0.633814525142247	1	2.59294379740467	NA	1	NA	NA	Constitutive activation (a = 1.0)	0.644877570096886	0.988474325794304	0.413793103448276
0.637444921321554	0.633814525142185	2	2.59294379740467	NA	NA	0.01	NA	Recipients-density-sensing (r50 = 0.01)	0.644877570096886	0.988474325794562	0.413793103448276
0.637444921322062	0.633814525141099	2	2.59294379740467	NA	NA	0.1	NA	Recipients-density-sensing (r50 = 0.1)	0.644877570096886	0.988474325795349	0.413793103448276
0.429756480848757	0.301565989368283	2	2.59294379740467	NA	NA	1	NA	Recipients-density-sensing (r50 = 1.0)	0.644877570096886	0.66641561247694	0.413793103448276
8.61701780166622e-15	5.32907051820075e-15	2	2.59294379740467	NA	NA	10	NA	Recipients-density-sensing (r50 = 1e+01)	0.644877570096886	1.33622538621891e-14	0.413793103448276
8.61701907951082e-15	5.32907051820075e-15	2	2.59294379740467	NA	NA	100	NA	Recipients-density-sensing (r50 = 1e+02)	0.644877570096886	1.33622558437196e-14	0.413793103448276
0.637444921321727	0.633814525142073	3	2.59294379740467	NA	NA	NA	0.01	Population-size-sensing (p50 = 0.01)	0.644877570096886	0.988474325794829	0.413793103448276
0.637444921321535	0.63381452514219	3	2.59294379740467	NA	NA	NA	0.1	Population-size-sensing (p50 = 0.1)	0.644877570096886	0.988474325794532	0.413793103448276
0.644877570096886	0.590932080505396	3	2.59294379740467	NA	NA	NA	1	Population-size-sensing (p50 = 1.0)	0.644877570096886	1	0.413793103448276
8.61701876829018e-15	5.32907051820075e-15	3	2.59294379740467	NA	NA	NA	10	Population-size-sensing (p50 = 1e+01)	0.644877570096886	1.33622553611154e-14	0.413793103448276
8.61701907951082e-15	5.32907051820075e-15	3	2.59294379740467	NA	NA	NA	100	Population-size-sensing (p50 = 1e+02)	0.644877570096886	1.33622558437196e-14	0.413793103448276
0.9225891784213	0.658488735521502	0	3.56224789026244	0.5	NA	NA	NA	Ratio-sensing (theta = 0.5)	0.9225891784213	1	0.551724137931034
0.830655005774933	0.73875494684966	0	3.56224789026244	0.111111111111111	NA	NA	NA	Ratio-sensing (theta = 0.11)	0.9225891784213	0.900351993285158	0.551724137931034
0.907744459400609	0.688112581291422	0	3.56224789026244	0.428571428571429	NA	NA	NA	Ratio-sensing (theta = 0.43)	0.9225891784213	0.983909719116701	0.551724137931034
0.85710405699758	0.502074710009411	0	3.56224789026244	1	NA	NA	NA	Ratio-sensing (theta = 1.0)	0.9225891784213	0.929020280147037	0.551724137931034
0.601841766967	0.307107612094116	0	3.56224789026244	2.33333333333333	NA	NA	NA	Ratio-sensing (theta = 2.3)	0.9225891784213	0.652339937475583	0.551724137931034
0.224944062702408	0.104612017690204	0	3.56224789026244	9	NA	NA	NA	Ratio-sensing (theta = 9.0)	0.9225891784213	0.243818232387381	0.551724137931034
-1.75110747602704e-14	-7.7715611723761e-15	1	3.56224789026244	NA	0	NA	NA	Constitutive activation (a = 0.0)	0.9225891784213	-1.89803600235532e-14	0.551724137931034
0.0576474348551485	0.0260668250232403	1	3.56224789026244	NA	0.25	NA	NA	Constitutive activation (a = 0.25)	0.9225891784213	0.062484403896643	0.551724137931034
0.891852708767641	0.544897578234679	1	3.56224789026244	NA	0.5	NA	NA	Constitutive activation (a = 0.5)	0.9225891784213	0.966684554325411	0.551724137931034
0.908689319551657	0.686838494105031	1	3.56224789026244	NA	0.75	NA	NA	Constitutive activation (a = 0.75)	0.9225891784213	0.98493385875886	0.551724137931034
0.830655005744726	0.73875494686026	1	3.56224789026244	NA	1	NA	NA	Constitutive activation (a = 1.0)	0.9225891784213	0.900351993252416	0.551724137931034
0.830655005749584	0.738754946864178	2	3.56224789026244	NA	NA	0.01	NA	Recipients-density-sensing (r50 = 0.01)	0.9225891784213	0.900351993257682	0.551724137931034
0.830655005894591	0.738754946807656	2	3.56224789026244	NA	NA	0.1	NA	Recipients-density-sensing (r50 = 0.1)	0.9225891784213	0.900351993414856	0.551724137931034
0.801815796595777	0.449141755683965	2	3.56224789026244	NA	NA	1	NA	Recipients-density-sensing (r50 = 1.0)	0.9225891784213	0.869092999733439	0.551724137931034
-1.75110755619662e-14	-7.7715611723761e-15	2	3.56224789026244	NA	NA	10	NA	Recipients-density-sensing (r50 = 1e+01)	0.9225891784213	-1.89803608925161e-14	0.551724137931034
-1.75110747602704e-14	-7.7715611723761e-15	2	3.56224789026244	NA	NA	100	NA	Recipients-density-sensing (r50 = 1e+02)	0.9225891784213	-1.89803600235532e-14	0.551724137931034
0.830655005744894	0.738754946860578	3	3.56224789026244	NA	NA	NA	0.01	Population-size-sensing (p50 = 0.01)	0.9225891784213	0.900351993252598	0.551724137931034
0.830655005744886	0.7387549468606	3	3.56224789026244	NA	NA	NA	0.1	Population-size-sensing (p50 = 0.1)	0.9225891784213	0.90035199325259	0.551724137931034
0.847856984678261	0.73200568861648	3	3.56224789026244	NA	NA	NA	1	Population-size-sensing (p50 = 1.0)	0.9225891784213	0.918997322436713	0.551724137931034
-1.75110756121181e-14	-7.7715611723761e-15	3	3.56224789026244	NA	NA	NA	10	Population-size-sensing (p50 = 1e+01)	0.9225891784213	-1.89803609468761e-14	0.551724137931034
-1.75110747602704e-14	-7.7715611723761e-15	3	3.56224789026244	NA	NA	NA	100	Population-size-sensing (p50 = 1e+02)	0.9225891784213	-1.89803600235532e-14	0.551724137931034
1.31261850867052	0.668515275641168	0	4.89390091847749	0.5	NA	NA	NA	Ratio-sensing (theta = 0.5)	1.31261850867052	1	0.689655172413793
1.0026595969495	0.815140567361795	0	4.89390091847749	0.111111111111111	NA	NA	NA	Ratio-sensing (theta = 0.11)	1.31261850867052	0.763862150599291	0.689655172413793
1.30398525977954	0.699852801962435	0	4.89390091847749	0.428571428571429	NA	NA	NA	Ratio-sensing (theta = 0.43)	1.31261850867052	0.993422880422644	0.689655172413793
1.19896793786962	0.509213880092649	0	4.89390091847749	1	NA	NA	NA	Ratio-sensing (theta = 1.0)	1.31261850867052	0.913416906701999	0.689655172413793
0.840468786620892	0.312136263851438	0	4.89390091847749	2.33333333333333	NA	NA	NA	Ratio-sensing (theta = 2.3)	1.31261850867052	0.640299356644115	0.689655172413793
0.31494250311618	0.106636399404275	0	4.89390091847749	9	NA	NA	NA	Ratio-sensing (theta = 9.0)	1.31261850867052	0.239934528605092	0.689655172413793
-1.08665840391706e-12	-3.54605234065275e-13	1	4.89390091847749	NA	0	NA	NA	Constitutive activation (a = 0.0)	1.31261850867052	-8.27855463517485e-13	0.689655172413793
0.89760803309575	0.338226999355547	1	4.89390091847749	NA	0.25	NA	NA	Constitutive activation (a = 0.25)	1.31261850867052	0.683830090134023	0.689655172413793
1.30506152289609	0.69766887545132	1	4.89390091847749	NA	0.5	NA	NA	Constitutive activation (a = 0.5)	1.31261850867052	0.994242816382284	0.689655172413793
1.16073606923632	0.788686025580527	1	4.89390091847749	NA	0.75	NA	NA	Constitutive activation (a = 0.75)	1.31261850867052	0.884290493825175	0.689655172413793
1.00265922952386	0.815140595467386	1	4.89390091847749	NA	1	NA	NA	Constitutive activation (a = 1.0)	1.31261850867052	0.763861870681223	0.689655172413793
1.00265922953827	0.815140595471275	2	4.89390091847749	NA	NA	0.01	NA	Recipients-density-sensing (r50 = 0.01)	1.31261850867052	0.763861870692197	0.689655172413793
1.00265927189378	0.815140592240907	2	4.89390091847749	NA	NA	0.1	NA	Recipients-density-sensing (r50 = 0.1)	1.31261850867052	0.763861902960147	0.689655172413793
1.26248201890424	0.565116139104749	2	4.89390091847749	NA	NA	1	NA	Recipients-density-sensing (r50 = 1.0)	1.31261850867052	0.961804218487619	0.689655172413793
-1.08665839373813e-12	-3.54605234065275e-13	2	4.89390091847749	NA	NA	10	NA	Recipients-density-sensing (r50 = 1e+01)	1.31261850867052	-8.27855455762807e-13	0.689655172413793
-1.08665840391706e-12	-3.54605234065275e-13	2	4.89390091847749	NA	NA	100	NA	Recipients-density-sensing (r50 = 1e+02)	1.31261850867052	-8.27855463517485e-13	0.689655172413793
1.0026592295295	0.815140595469111	3	4.89390091847749	NA	NA	NA	0.01	Population-size-sensing (p50 = 0.01)	1.31261850867052	0.763861870685518	0.689655172413793
1.00265922952972	0.815140595466682	3	4.89390091847749	NA	NA	NA	0.1	Population-size-sensing (p50 = 0.1)	1.31261850867052	0.763861870685686	0.689655172413793
1.0103724258807	0.814521765555205	3	4.89390091847749	NA	NA	NA	1	Population-size-sensing (p50 = 1.0)	1.31261850867052	0.769738061140134	0.689655172413793
-4.7128074846895e-14	-1.53210777398272e-14	3	4.89390091847749	NA	NA	NA	10	Population-size-sensing (p50 = 1e+01)	1.31261850867052	-3.59038628021697e-14	0.689655172413793
-1.08665840391706e-12	-3.54605234065275e-13	3	4.89390091847749	NA	NA	NA	100	Population-size-sensing (p50 = 1e+02)	1.31261850867052	-8.27855463517485e-13	0.689655172413793
1.84432104111737	0.675048998485612	0	6.72335753649934	0.5	NA	NA	NA	Ratio-sensing (theta = 0.5)	1.84432104111737	1	0.827586206896552
1.15210847679423	0.870774881489739	0	6.72335753649934	0.111111111111111	NA	NA	NA	Ratio-sensing (theta = 0.11)	1.84432104111737	0.624678920377242	0.827586206896552
1.84191999580898	0.706627203115751	0	6.72335753649934	0.428571428571429	NA	NA	NA	Ratio-sensing (theta = 0.43)	1.84432104111737	0.998698141345864	0.827586206896552
1.66954324656199	0.515044469196618	0	6.72335753649934	1	NA	NA	NA	Ratio-sensing (theta = 1.0)	1.84432104111737	0.905234614441374	0.827586206896552
1.17078437988181	0.316604593342969	0	6.72335753649934	2.33333333333333	NA	NA	NA	Ratio-sensing (theta = 2.3)	1.84432104111737	0.634805087498485	0.827586206896552
0.440151214442343	0.108512490300116	0	6.72335753649934	9	NA	NA	NA	Ratio-sensing (theta = 9.0)	1.84432104111737	0.238652167724379	0.827586206896552
-6.76958025652805e-14	-1.59872115546023e-14	1	6.72335753649934	NA	0	NA	NA	Constitutive activation (a = 0.0)	1.84432104111737	-3.67049993228226e-14	0.827586206896552
1.74537748249311	0.560630043594616	1	6.72335753649934	NA	0.25	NA	NA	Constitutive activation (a = 0.25)	1.84432104111737	0.946352312629742	0.827586206896552
1.68871335904054	0.808870397454228	1	6.72335753649934	NA	0.5	NA	NA	Constitutive activation (a = 0.5)	1.84432104111737	0.915628744341303	0.827586206896552
1.38301345747564	0.862820373656968	1	6.72335753649934	NA	0.75	NA	NA	Constitutive activation (a = 0.75)	1.84432104111737	0.749876744147403	0.827586206896552
1.14967879775642	0.870741356558211	1	6.72335753649934	NA	1	NA	NA	Constitutive activation (a = 1.0)	1.84432104111737	0.623361536373241	0.827586206896552
1.1496787976718	0.870741356545008	2	6.72335753649934	NA	NA	0.01	NA	Recipients-density-sensing (r50 = 0.01)	1.84432104111737	0.623361536327361	0.827586206896552
1.14969685521939	0.870741614726886	2	6.72335753649934	NA	NA	0.1	NA	Recipients-density-sensing (r50 = 0.1)	1.84432104111737	0.623371327219068	0.827586206896552
1.83910887283331	0.657099602195434	2	6.72335753649934	NA	NA	1	NA	Recipients-density-sensing (r50 = 1.0)	1.84432104111737	0.99717393655017	0.827586206896552
-6.76943515361098e-14	-1.59872115546023e-14	2	6.72335753649934	NA	NA	10	NA	Recipients-density-sensing (r50 = 1e+01)	1.84432104111737	-3.6704212567622e-14	0.827586206896552
-6.76958025652805e-14	-1.59872115546023e-14	2	6.72335753649934	NA	NA	100	NA	Recipients-density-sensing (r50 = 1e+02)	1.84432104111737	-3.67049993228226e-14	0.827586206896552
1.14967879777708	0.870741356529693	3	6.72335753649934	NA	NA	NA	0.01	Population-size-sensing (p50 = 0.01)	1.84432104111737	0.623361536384444	0.827586206896552
1.14967879765425	0.870741356512827	3	6.72335753649934	NA	NA	NA	0.1	Population-size-sensing (p50 = 0.1)	1.84432104111737	0.623361536317843	0.827586206896552
1.15258829833515	0.870781212775829	3	6.72335753649934	NA	NA	NA	1	Population-size-sensing (p50 = 1.0)	1.84432104111737	0.624939081992397	0.827586206896552
-6.76942295174021e-14	-1.59872115546023e-14	3	6.72335753649934	NA	NA	NA	10	Population-size-sensing (p50 = 1e+01)	1.84432104111737	-3.67041464084745e-14	0.827586206896552
-6.76958025652805e-14	-1.59872115546023e-14	3	6.72335753649934	NA	NA	NA	100	Population-size-sensing (p50 = 1e+02)	1.84432104111737	-3.67049993228226e-14	0.827586206896552
2.5726076275891	0.680242077671607	0	9.23670857187386	0.5	NA	NA	NA	Ratio-sensing (theta = 0.5)	2.57669458488635	0.998413875931894	0.96551724137931
1.93277792239171	0.899192983996892	0	9.23670857187386	0.111111111111111	NA	NA	NA	Ratio-sensing (theta = 0.11)	2.57669458488635	0.750099733871626	0.96551724137931
2.57669458488635	0.711783670309497	0	9.23670857187386	0.428571428571429	NA	NA	NA	Ratio-sensing (theta = 0.43)	2.57669458488635	1	0.96551724137931
2.31821751047009	0.520184928623649	0	9.23670857187386	1	NA	NA	NA	Ratio-sensing (theta = 1.0)	2.57669458488635	0.899686569012735	0.96551724137931
1.62833499500014	0.320746497290131	0	9.23670857187386	2.33333333333333	NA	NA	NA	Ratio-sensing (theta = 2.3)	2.57669458488635	0.631947225934795	0.96551724137931
0.614429256570531	0.110301891791461	0	9.23670857187386	9	NA	NA	NA	Ratio-sensing (theta = 9.0)	2.57669458488635	0.238456377474645	0.96551724137931
-1.87893600228243e-13	-3.26405569239796e-14	1	9.23670857187386	NA	0	NA	NA	Constitutive activation (a = 0.0)	2.57669458488635	-7.29204001631921e-14	0.96551724137931
2.57364133435957	0.722516192960923	1	9.23670857187386	NA	0.25	NA	NA	Constitutive activation (a = 0.25)	2.57669458488635	0.998815051444326	0.96551724137931
2.02915328724971	0.889813472231723	1	9.23670857187386	NA	0.5	NA	NA	Constitutive activation (a = 0.5)	2.57669458488635	0.787502445633935	0.96551724137931
1.5714520105712	0.916782423482779	1	9.23670857187386	NA	0.75	NA	NA	Constitutive activation (a = 0.75)	2.57669458488635	0.609871274534663	0.96551724137931
1.27103466648799	0.911212894315069	1	9.23670857187386	NA	1	NA	NA	Constitutive activation (a = 1.0)	2.57669458488635	0.493281071782148	0.96551724137931
1.27103467546034	0.911212894987649	2	9.23670857187386	NA	NA	0.01	NA	Recipients-density-sensing (r50 = 0.01)	2.57669458488635	0.493281075264263	0.96551724137931
1.28409625186288	0.911880854881305	2	9.23670857187386	NA	NA	0.1	NA	Recipients-density-sensing (r50 = 0.1)	2.57669458488635	0.498350196175663	0.96551724137931
2.569769105667	0.730531816803551	2	9.23670857187386	NA	NA	1	NA	Recipients-density-sensing (r50 = 1.0)	2.57669458488635	0.997312262283636	0.96551724137931
-1.88950907893409e-13	-3.26405569239796e-14	2	9.23670857187386	NA	NA	10	NA	Recipients-density-sensing (r50 = 1e+01)	2.57669458488635	-7.33307350439218e-14	0.96551724137931
-1.87893600228243e-13	-3.26405569239796e-14	2	9.23670857187386	NA	NA	100	NA	Recipients-density-sensing (r50 = 1e+02)	2.57669458488635	-7.29204001631921e-14	0.96551724137931
1.2710346710752	0.911212891113542	3	9.23670857187386	NA	NA	NA	0.01	Population-size-sensing (p50 = 0.01)	2.57669458488635	0.493281073562414	0.96551724137931
1.27103466461997	0.911212887445926	3	9.23670857187386	NA	NA	NA	0.1	Population-size-sensing (p50 = 0.1)	2.57669458488635	0.493281071057177	0.96551724137931
1.27227444826615	0.911278137284675	3	9.23670857187386	NA	NA	NA	1	Population-size-sensing (p50 = 1.0)	2.57669458488635	0.493762223791946	0.96551724137931
-1.88949718887174e-13	-3.26405569239796e-14	3	9.23670857187386	NA	NA	NA	10	Population-size-sensing (p50 = 1e+01)	2.57669458488635	-7.33302735976016e-14	0.96551724137931
-1.87893600228243e-13	-3.26405569239796e-14	3	9.23670857187386	NA	NA	NA	100	Population-size-sensing (p50 = 1e+02)	2.57669458488635	-7.29204001631921e-14	0.96551724137931
3.57241637909294	0.684748598736932	0	12.6896100316792	0.5	NA	NA	NA	Ratio-sensing (theta = 0.5)	3.58387336358722	0.996803183781357	1.10344827586207
2.94735557073997	0.903045952334923	0	12.6896100316792	0.111111111111111	NA	NA	NA	Ratio-sensing (theta = 0.11)	3.58387336358722	0.82239389390418	1.10344827586207
3.58387336358722	0.716164632674481	0	12.6896100316792	0.428571428571429	NA	NA	NA	Ratio-sensing (theta = 0.43)	3.58387336358722	1	1.10344827586207
3.21285859250157	0.524914484668309	0	12.6896100316792	1	NA	NA	NA	Ratio-sensing (theta = 1.0)	3.58387336358722	0.896476595725947	1.10344827586207
2.262275788219	0.32468636032636	0	12.6896100316792	2.33333333333333	NA	NA	NA	Ratio-sensing (theta = 2.3)	3.58387336358722	0.631237646732755	1.10344827586207
0.857049992251457	0.112040221322233	0	12.6896100316792	9	NA	NA	NA	Ratio-sensing (theta = 9.0)	3.58387336358722	0.239140702056952	1.10344827586207
1.26423270038071e-15	1.11022302462516e-16	1	12.6896100316792	NA	0	NA	NA	Constitutive activation (a = 0.0)	3.58387336358722	3.52755963206048e-16	1.10344827586207
3.34431476571992	0.840352373886565	1	12.6896100316792	NA	0.25	NA	NA	Constitutive activation (a = 0.25)	3.58387336358722	0.933156511527092	1.10344827586207
2.31932167875926	0.948731563497228	1	12.6896100316792	NA	0.5	NA	NA	Constitutive activation (a = 0.5)	3.58387336358722	0.647155031292115	1.10344827586207
1.72593138841209	0.956061163426779	1	12.6896100316792	NA	0.75	NA	NA	Constitutive activation (a = 0.75)	3.58387336358722	0.481582693726809	1.10344827586207
1.36835437579272	0.940671815367002	1	12.6896100316792	NA	1	NA	NA	Constitutive activation (a = 1.0)	3.58387336358722	0.381808796509228	1.10344827586207
1.36835468729874	0.940671907096548	2	12.6896100316792	NA	NA	0.01	NA	Recipients-density-sensing (r50 = 0.01)	3.58387336358722	0.381808883428042	1.10344827586207
2.13409005888762	0.954684886381244	2	12.6896100316792	NA	NA	0.1	NA	Recipients-density-sensing (r50 = 0.1)	3.58387336358722	0.595470275420541	1.10344827586207
3.50757965183989	0.789352683444161	2	12.6896100316792	NA	NA	1	NA	Recipients-density-sensing (r50 = 1.0)	3.58387336358722	0.978711939846289	1.10344827586207
5.27501421859497e-14	6.55031584528842e-15	2	12.6896100316792	NA	NA	10	NA	Recipients-density-sensing (r50 = 1e+01)	3.58387336358722	1.47187517064359e-14	1.10344827586207
1.26423270038071e-15	1.11022302462516e-16	2	12.6896100316792	NA	NA	100	NA	Recipients-density-sensing (r50 = 1e+02)	3.58387336358722	3.52755963206048e-16	1.10344827586207
1.3683544027616	0.940671834820373	3	12.6896100316792	NA	NA	NA	0.01	Population-size-sensing (p50 = 0.01)	3.58387336358722	0.381808804034293	1.10344827586207
1.36835449060572	0.940671823274001	3	12.6896100316792	NA	NA	NA	0.1	Population-size-sensing (p50 = 0.1)	3.58387336358722	0.381808828545237	1.10344827586207
1.36898264251552	0.940716648823538	3	12.6896100316792	NA	NA	NA	1	Population-size-sensing (p50 = 1.0)	3.58387336358722	0.381984100338095	1.10344827586207
5.27633762523294e-14	6.55031584528842e-15	3	12.6896100316792	NA	NA	NA	10	Population-size-sensing (p50 = 1e+01)	3.58387336358722	1.47224443777547e-14	1.10344827586207
1.26423270038071e-15	1.11022302462516e-16	3	12.6896100316792	NA	NA	NA	100	Population-size-sensing (p50 = 1e+02)	3.58387336358722	3.52755963206048e-16	1.10344827586207
4.94629076679419	0.688849471870517	0	17.4332882219999	0.5	NA	NA	NA	Ratio-sensing (theta = 0.5)	4.96651568175628	0.995927745675629	1.24137931034483
4.2503823511843	0.905438859366194	0	17.4332882219999	0.111111111111111	NA	NA	NA	Ratio-sensing (theta = 0.11)	4.96651568175628	0.855807697697888	1.24137931034483
4.96651568175628	0.720102799248848	0	17.4332882219999	0.428571428571429	NA	NA	NA	Ratio-sensing (theta = 0.43)	4.96651568175628	1	1.24137931034483
4.44694138202099	0.529381139671459	0	17.4332882219999	1	NA	NA	NA	Ratio-sensing (theta = 1.0)	4.96651568175628	0.895384544612662	1.24137931034483
3.14065139620138	0.328497257175988	0	17.4332882219999	2.33333333333333	NA	NA	NA	Ratio-sensing (theta = 2.3)	4.96651568175628	0.632365142374979	1.24137931034483
1.19483250538986	0.113749669174579	0	17.4332882219999	9	NA	NA	NA	Ratio-sensing (theta = 9.0)	4.96651568175628	0.240577616573102	1.24137931034483
-3.77361209148078e-14	-3.33066907387547e-15	1	17.4332882219999	NA	0	NA	NA	Constitutive activation (a = 0.0)	4.96651568175628	-7.59810767404311e-15	1.24137931034483
4.02952389895643	0.926124786084009	1	17.4332882219999	NA	0.25	NA	NA	Constitutive activation (a = 0.25)	4.96651568175628	0.81133820109705	1.24137931034483
2.55827048776349	0.991617773689314	1	17.4332882219999	NA	0.5	NA	NA	Constitutive activation (a = 0.5)	4.96651568175628	0.515103676640124	1.24137931034483
1.84913096658274	0.984652490458745	1	17.4332882219999	NA	0.75	NA	NA	Constitutive activation (a = 0.75)	4.96651568175628	0.372319566688419	1.24137931034483
1.44461257069844	0.962104203225175	1	17.4332882219999	NA	1	NA	NA	Constitutive activation (a = 1.0)	4.96651568175628	0.290870433774124	1.24137931034483
1.44508851048985	0.962216763139905	2	17.4332882219999	NA	NA	0.01	NA	Recipients-density-sensing (r50 = 0.01)	4.96651568175628	0.290966263490954	1.24137931034483
3.29821550181513	0.971444679716464	2	17.4332882219999	NA	NA	0.1	NA	Recipients-density-sensing (r50 = 0.1)	4.96651568175628	0.66409042337883	1.24137931034483
4.72678196227927	0.83647070121014	2	17.4332882219999	NA	NA	1	NA	Recipients-density-sensing (r50 = 1.0)	4.96651568175628	0.951729998486134	1.24137931034483
1.64617484784302	0.15946555154429	2	17.4332882219999	NA	NA	10	NA	Recipients-density-sensing (r50 = 1e+01)	4.96651568175628	0.331454676341804	1.24137931034483
-3.77361209148078e-14	-3.33066907387547e-15	2	17.4332882219999	NA	NA	100	NA	Recipients-density-sensing (r50 = 1e+02)	4.96651568175628	-7.59810767404311e-15	1.24137931034483
1.44461835110133	0.962104497594826	3	17.4332882219999	NA	NA	NA	0.01	Population-size-sensing (p50 = 0.01)	4.96651568175628	0.290871597649013	1.24137931034483
1.44463068852453	0.962105361915912	3	17.4332882219999	NA	NA	NA	0.1	Population-size-sensing (p50 = 0.1)	4.96651568175628	0.290874081769469	1.24137931034483
1.44495680032165	0.962141667897348	3	17.4332882219999	NA	NA	NA	1	Population-size-sensing (p50 = 1.0)	4.96651568175628	0.290939743858953	1.24137931034483
4.06528565259795	0.459851930167208	3	17.4332882219999	NA	NA	NA	10	Population-size-sensing (p50 = 1e+01)	4.96651568175628	0.818538773074077	1.24137931034483
-3.77361209148078e-14	-3.33066907387547e-15	3	17.4332882219999	NA	NA	NA	100	Population-size-sensing (p50 = 1e+02)	4.96651568175628	-7.59810767404311e-15	1.24137931034483
6.8349142017447	0.692689109024106	0	23.9502661998749	0.5	NA	NA	NA	Ratio-sensing (theta = 0.5)	6.86577687658431	0.995504853216995	1.37931034482759
6.00491845693123	0.907349961341716	0	23.9502661998749	0.111111111111111	NA	NA	NA	Ratio-sensing (theta = 0.11)	6.86577687658431	0.874616021591231	1.37931034482759
6.86577687658431	0.723761368700778	0	23.9502661998749	0.428571428571429	NA	NA	NA	Ratio-sensing (theta = 0.43)	6.86577687658431	1	1.37931034482759
6.14929380574765	0.533671450950978	0	23.9502661998749	1	NA	NA	NA	Ratio-sensing (theta = 1.0)	6.86577687658431	0.895644282691414	1.37931034482759
4.35768167472242	0.332225001471261	0	23.9502661998749	2.33333333333333	NA	NA	NA	Ratio-sensing (theta = 2.3)	6.86577687658431	0.634696080728208	1.37931034482759
1.66510279954709	0.11544478233443	0	23.9502661998749	9	NA	NA	NA	Ratio-sensing (theta = 9.0)	6.86577687658431	0.242522125242071	1.37931034482759
-1.90399309591418e-13	-1.26565424807268e-14	1	23.9502661998749	NA	0	NA	NA	Constitutive activation (a = 0.0)	6.86577687658431	-2.77316482918012e-14	1.37931034482759
4.61454736483734	0.988558129188078	1	23.9502661998749	NA	0.25	NA	NA	Constitutive activation (a = 0.25)	6.86577687658431	0.672108553450845	1.37931034482759
3.32126861169646	1	1	23.9502661998749	NA	0.5	NA	NA	Constitutive activation (a = 0.5)	6.86577687658431	0.483742578793032	1.37931034482759
2.10779816554906	1	1	23.9502661998749	NA	0.75	NA	NA	Constitutive activation (a = 0.75)	6.86577687658431	0.307000679375074	1.37931034482759
1.50291615950363	0.977486053829063	1	23.9502661998749	NA	1	NA	NA	Constitutive activation (a = 1.0)	6.86577687658431	0.218899650617735	1.37931034482759
4.35453940706563	0.997818223798803	2	23.9502661998749	NA	NA	0.01	NA	Recipients-density-sensing (r50 = 0.01)	6.86577687658431	0.634238409628015	1.37931034482759
4.80668308631068	0.980767240100019	2	23.9502661998749	NA	NA	0.1	NA	Recipients-density-sensing (r50 = 0.1)	6.86577687658431	0.700093110031561	1.37931034482759
6.33119220783548	0.874088398625098	2	23.9502661998749	NA	NA	1	NA	Recipients-density-sensing (r50 = 1.0)	6.86577687658431	0.922137774303149	1.37931034482759
4.44323080229815	0.340170500690362	2	23.9502661998749	NA	NA	10	NA	Recipients-density-sensing (r50 = 1e+01)	6.86577687658431	0.647156306149675	1.37931034482759
-1.90399305860589e-13	-1.26565424807268e-14	2	23.9502661998749	NA	NA	100	NA	Recipients-density-sensing (r50 = 1e+02)	6.86577687658431	-2.77316477484063e-14	1.37931034482759
1.50316026374127	0.977487975383619	3	23.9502661998749	NA	NA	NA	0.01	Population-size-sensing (p50 = 0.01)	6.86577687658431	0.218935204385652	1.37931034482759
1.50370458531135	0.977502430366293	3	23.9502661998749	NA	NA	NA	0.1	Population-size-sensing (p50 = 0.1)	6.86577687658431	0.219014484790458	1.37931034482759
1.50222833711895	0.977772170496279	3	23.9502661998749	NA	NA	NA	1	Population-size-sensing (p50 = 1.0)	6.86577687658431	0.218799469327688	1.37931034482759
6.84286471856869	0.764323781952372	3	23.9502661998749	NA	NA	NA	10	Population-size-sensing (p50 = 1e+01)	6.86577687658431	0.996662845526811	1.37931034482759
-1.90399305860589e-13	-1.26565424807268e-14	3	23.9502661998749	NA	NA	NA	100	Population-size-sensing (p50 = 1e+02)	6.86577687658431	-2.77316477484063e-14	1.37931034482759
9.43149810977001	0.696350274826882	0	32.9034456231267	0.5	NA	NA	NA	Ratio-sensing (theta = 0.5)	9.47532962732799	0.99537414324547	1.51724137931034
8.39490793793668	0.909019018104748	0	32.9034456231267	0.111111111111111	NA	NA	NA	Ratio-sensing (theta = 0.11)	9.47532962732799	0.885975292482148	1.51724137931034
9.47532962732799	0.727231173263741	0	32.9034456231267	0.428571428571429	NA	NA	NA	Ratio-sensing (theta = 0.43)	9.47532962732799	1	1.51724137931034
8.49750178421431	0.537839408697347	0	32.9034456231267	1	NA	NA	NA	Ratio-sensing (theta = 1.0)	9.47532962732799	0.896802762376361	1.51724137931034
6.04383808204374	0.33589960460085	0	32.9034456231267	2.33333333333333	NA	NA	NA	Ratio-sensing (theta = 2.3)	9.47532962732799	0.637849902826873	1.51724137931034
2.31981265433074	0.117135446382965	0	32.9034456231267	9	NA	NA	NA	Ratio-sensing (theta = 9.0)	9.47532962732799	0.244826591324077	1.51724137931034
-6.03057949158518e-14	-2.88657986402541e-15	1	32.9034456231267	NA	0	NA	NA	Constitutive activation (a = 0.0)	9.47532962732799	-6.36450627975228e-15	1.51724137931034
6.05444878663	1	1	32.9034456231267	NA	0.25	NA	NA	Constitutive activation (a = 0.25)	9.47532962732799	0.638969727149992	1.51724137931034
4.5628378596643	1	1	32.9034456231267	NA	0.5	NA	NA	Constitutive activation (a = 0.5)	9.47532962732799	0.481549248324251	1.51724137931034
2.89574327284845	1	1	32.9034456231267	NA	0.75	NA	NA	Constitutive activation (a = 0.75)	9.47532962732799	0.305608710909305	1.51724137931034
1.53119633451398	0.991322637807349	1	32.9034456231267	NA	1	NA	NA	Constitutive activation (a = 1.0)	9.47532962732799	0.161598212910486	1.51724137931034
6.49833272371038	0.998577309248658	2	32.9034456231267	NA	NA	0.01	NA	Recipients-density-sensing (r50 = 0.01)	9.47532962732799	0.685816006333796	1.51724137931034
6.84297223238041	0.986716199410893	2	32.9034456231267	NA	NA	0.1	NA	Recipients-density-sensing (r50 = 0.1)	9.47532962732799	0.722188303892295	1.51724137931034
8.46578932569578	0.903927290392402	2	32.9034456231267	NA	NA	1	NA	Recipients-density-sensing (r50 = 1.0)	9.47532962732799	0.893455917489079	1.51724137931034
7.92653680396567	0.480923489840513	2	32.9034456231267	NA	NA	10	NA	Recipients-density-sensing (r50 = 1e+01)	9.47532962732799	0.836544702477113	1.51724137931034
-6.03057989127326e-14	-2.88657986402541e-15	2	32.9034456231267	NA	NA	100	NA	Recipients-density-sensing (r50 = 1e+02)	9.47532962732799	-6.36450670157199e-15	1.51724137931034
1.5272528476278	0.991137575272399	3	32.9034456231267	NA	NA	NA	0.01	Population-size-sensing (p50 = 0.01)	9.47532962732799	0.161182028245542	1.51724137931034
1.52021627155389	0.990579937137777	3	32.9034456231267	NA	NA	NA	0.1	Population-size-sensing (p50 = 0.1)	9.47532962732799	0.160439407529359	1.51724137931034
1.57934631936171	0.988694233686086	3	32.9034456231267	NA	NA	NA	1	Population-size-sensing (p50 = 1.0)	9.47532962732799	0.166679828721386	1.51724137931034
8.27616031871051	0.917088550181644	3	32.9034456231267	NA	NA	NA	10	Population-size-sensing (p50 = 1e+01)	9.47532962732799	0.873442998208851	1.51724137931034
-6.03057968745853e-14	-2.88657986402541e-15	3	32.9034456231267	NA	NA	NA	100	Population-size-sensing (p50 = 1e+02)	9.47532962732799	-6.36450648647158e-15	1.51724137931034
13.0015005918291	0.699883879357026	0	45.2035365636024	0.5	NA	NA	NA	Ratio-sensing (theta = 0.5)	13.0610811832281	0.995438310920571	1.6551724137931
11.6636191154869	0.910543407185287	0	45.2035365636024	0.111111111111111	NA	NA	NA	Ratio-sensing (theta = 0.11)	13.0610811832281	0.893005636506132	1.6551724137931
13.0610811832281	0.730567015611122	0	45.2035365636024	0.428571428571429	NA	NA	NA	Ratio-sensing (theta = 0.43)	13.0610811832281	1	1.6551724137931
11.7363706424125	0.541920188108376	0	45.2035365636024	1	NA	NA	NA	Ratio-sensing (theta = 1.0)	13.0610811832281	0.898575736401006	1.6551724137931
8.37978738302523	0.339541324960692	0	45.2035365636024	2.33333333333333	NA	NA	NA	Ratio-sensing (theta = 2.3)	13.0610811832281	0.641584510919801	1.6551724137931
3.23127043802795	0.118828557360546	0	45.2035365636024	9	NA	NA	NA	Ratio-sensing (theta = 9.0)	13.0610811832281	0.247396857327344	1.6551724137931
-1.68513677973511e-14	-6.66133814775094e-16	1	45.2035365636024	NA	0	NA	NA	Constitutive activation (a = 0.0)	13.0610811832281	-1.29019700290892e-15	1.6551724137931
8.31774581409647	1	1	45.2035365636024	NA	0.25	NA	NA	Constitutive activation (a = 0.25)	13.0610811832281	0.636834401180921	1.6551724137931
6.26853521889884	1	1	45.2035365636024	NA	0.5	NA	NA	Constitutive activation (a = 0.5)	13.0610811832281	0.479939993554923	1.6551724137931
3.97824101993872	1	1	45.2035365636024	NA	0.75	NA	NA	Constitutive activation (a = 0.75)	13.0610811832281	0.304587419994542	1.6551724137931
1.40229251596084	1	1	45.2035365636024	NA	1	NA	NA	Constitutive activation (a = 1.0)	13.0610811832281	0.10736419874348	1.6551724137931
9.32796956906185	0.999030394753518	2	45.2035365636024	NA	NA	0.01	NA	Recipients-density-sensing (r50 = 0.01)	13.0610811832281	0.714180506054889	1.6551724137931
9.62178152333466	0.990705240778236	2	45.2035365636024	NA	NA	0.1	NA	Recipients-density-sensing (r50 = 0.1)	13.0610811832281	0.73667573061946	1.6551724137931
11.3324339649048	0.927380603079091	2	45.2035365636024	NA	NA	1	NA	Recipients-density-sensing (r50 = 1.0)	13.0610811832281	0.867648995203925	1.6551724137931
12.2861033368324	0.591426897209804	2	45.2035365636024	NA	NA	10	NA	Recipients-density-sensing (r50 = 1e+01)	13.0610811832281	0.940665107618283	1.6551724137931
-1.68514152486915e-14	-6.66133814775094e-16	2	45.2035365636024	NA	NA	100	NA	Recipients-density-sensing (r50 = 1e+02)	13.0610811832281	-1.29020063594204e-15	1.6551724137931
1.40229075484734	1	3	45.2035365636024	NA	NA	NA	0.01	Population-size-sensing (p50 = 0.01)	13.0610811832281	0.107364063906749	1.6551724137931
1.40228653226864	1	3	45.2035365636024	NA	NA	NA	0.1	Population-size-sensing (p50 = 0.1)	13.0610811832281	0.10736374061202	1.6551724137931
1.4128595061612	1	3	45.2035365636024	NA	NA	NA	1	Population-size-sensing (p50 = 1.0)	13.0610811832281	0.108173242807454	1.6551724137931
9.13916451026386	1	3	45.2035365636024	NA	NA	NA	10	Population-size-sensing (p50 = 1e+01)	13.0610811832281	0.699724960135732	1.6551724137931
-1.68514010219593e-14	-6.66133814775094e-16	3	45.2035365636024	NA	NA	NA	100	Population-size-sensing (p50 = 1e+02)	13.0610811832281	-1.2901995466959e-15	1.6551724137931
17.9096927489194	0.703322774916462	0	62.1016941891562	0.5	NA	NA	NA	Ratio-sensing (theta = 0.5)	17.9882071185895	0.995635230951451	1.79310344827586
16.1413948089591	0.911972176891707	0	62.1016941891562	0.111111111111111	NA	NA	NA	Ratio-sensing (theta = 0.11)	17.9882071185895	0.897332052190915	1.79310344827586
17.9882071185895	0.733803799169912	0	62.1016941891562	0.428571428571429	NA	NA	NA	Ratio-sensing (theta = 0.43)	17.9882071185895	1	1.79310344827586
16.2033584768353	0.545937397550386	0	62.1016941891562	1	NA	NA	NA	Ratio-sensing (theta = 1.0)	17.9882071185895	0.900776735002694	1.79310344827586
11.6156890719597	0.343164117830525	0	62.1016941891562	2.33333333333333	NA	NA	NA	Ratio-sensing (theta = 2.3)	17.9882071185895	0.645739122047116	1.79310344827586
4.50011527022596	0.120529021477983	0	62.1016941891562	9	NA	NA	NA	Ratio-sensing (theta = 9.0)	17.9882071185895	0.250170305498396	1.79310344827586
-2.96809162327555e-14	-6.66133814775094e-16	1	62.1016941891562	NA	0	NA	NA	Constitutive activation (a = 0.0)	17.9882071185895	-1.65002081847737e-15	1.79310344827586
11.4271171288312	1	1	62.1016941891562	NA	0.25	NA	NA	Constitutive activation (a = 0.25)	17.9882071185895	0.635256034884217	1.79310344827586
8.61186284284757	1	1	62.1016941891562	NA	0.5	NA	NA	Constitutive activation (a = 0.5)	17.9882071185895	0.478750482806473	1.79310344827586
5.46540217456597	1	1	62.1016941891562	NA	0.75	NA	NA	Constitutive activation (a = 0.75)	17.9882071185895	0.303832513075629	1.79310344827586
1.92646548754935	1	1	62.1016941891562	NA	1	NA	NA	Constitutive activation (a = 1.0)	17.9882071185895	0.107096025459841	1.79310344827586
13.1646374677749	0.99932631849144	2	62.1016941891562	NA	NA	0.01	NA	Recipients-density-sensing (r50 = 0.01)	17.9882071185895	0.731848225950778	1.79310344827586
13.4285789152601	0.993446367315316	2	62.1016941891562	NA	NA	0.1	NA	Recipients-density-sensing (r50 = 0.1)	17.9882071185895	0.74652125288143	1.79310344827586
15.2110847552102	0.945612129618899	2	62.1016941891562	NA	NA	1	NA	Recipients-density-sensing (r50 = 1.0)	17.9882071185895	0.84561427689426	1.79310344827586
17.7801067819611	0.678750446796884	2	62.1016941891562	NA	NA	10	NA	Recipients-density-sensing (r50 = 1e+01)	17.9882071185895	0.988431290830903	1.79310344827586
-2.96809543734129e-14	-6.66133814775094e-16	2	62.1016941891562	NA	NA	100	NA	Recipients-density-sensing (r50 = 1e+02)	17.9882071185895	-1.65002293879193e-15	1.79310344827586
1.92646234135942	1	3	62.1016941891562	NA	NA	NA	0.01	Population-size-sensing (p50 = 0.01)	17.9882071185895	0.107095850556922	1.79310344827586
1.92645475429335	1	3	62.1016941891562	NA	NA	NA	0.1	Population-size-sensing (p50 = 0.1)	17.9882071185895	0.107095428776918	1.79310344827586
1.9264879095404	1	3	62.1016941891562	NA	NA	NA	1	Population-size-sensing (p50 = 1.0)	17.9882071185895	0.107097271942656	1.79310344827586
9.79555885539401	1	3	62.1016941891562	NA	NA	NA	10	Population-size-sensing (p50 = 1e+01)	17.9882071185895	0.544554484547324	1.79310344827586
-2.96810173270211e-14	-6.66133814775094e-16	3	62.1016941891562	NA	NA	NA	100	Population-size-sensing (p50 = 1e+02)	17.9882071185895	-1.65002643850748e-15	1.79310344827586
24.65733079118	0.706688875327349	0	85.3167852417281	0.5	NA	NA	NA	Ratio-sensing (theta = 0.5)	24.7625767626834	0.995749797264153	1.93103448275862
22.2798037922577	0.913333207136468	0	85.3167852417281	0.111111111111111	NA	NA	NA	Ratio-sensing (theta = 0.11)	24.7625767626834	0.899736889491763	1.93103448275862
24.7582530934416	0.736964599349276	0	85.3167852417281	0.428571428571429	NA	NA	NA	Ratio-sensing (theta = 0.43)	24.7625767626834	0.999825395019135	1.93103448275862
22.3636163935427	0.549907202790555	0	85.3167852417281	1	NA	NA	NA	Ratio-sensing (theta = 1.0)	24.7625767626834	0.9031215373048	1.93103448275862
16.0979016316181	0.346777723657293	0	85.3167852417281	2.33333333333333	NA	NA	NA	Ratio-sensing (theta = 2.3)	24.7625767626834	0.650089923431444	1.93103448275862
6.26641266296892	0.122240383579312	0	85.3167852417281	9	NA	NA	NA	Ratio-sensing (theta = 9.0)	24.7625767626834	0.253059797573743	1.93103448275862
-6.72246842167478e-12	-1.25899290992493e-13	1	85.3167852417281	NA	0	NA	NA	Constitutive activation (a = 0.0)	24.7625767626834	-2.71476934169686e-13	1.93103448275862
15.6988454177383	1	1	85.3167852417281	NA	0.25	NA	NA	Constitutive activation (a = 0.25)	24.7625767626834	0.633974629061873	1.93103448275862
11.8311821007294	1	1	85.3167852417281	NA	0.5	NA	NA	Constitutive activation (a = 0.5)	24.7625767626834	0.477784772324613	1.93103448275862
7.50849956945703	1	1	85.3167852417281	NA	0.75	NA	NA	Constitutive activation (a = 0.75)	24.7625767626834	0.303219638304046	1.93103448275862
2.64655440396044	1	1	85.3167852417281	NA	1	NA	NA	Constitutive activation (a = 1.0)	24.7625767626834	0.10687718121277	1.93103448275862
18.4075763963449	0.999526952371235	2	85.3167852417281	NA	NA	0.01	NA	Recipients-density-sensing (r50 = 0.01)	24.7625767626834	0.743362719185375	1.93103448275862
18.6519147492423	0.995356512632729	2	85.3167852417281	NA	NA	0.1	NA	Recipients-density-sensing (r50 = 0.1)	24.7625767626834	0.753229961808755	1.93103448275862
20.4884900835497	0.959614554210896	2	85.3167852417281	NA	NA	1	NA	Recipients-density-sensing (r50 = 1.0)	24.7625767626834	0.827397337518823	1.93103448275862
24.7625767626834	0.748089482920748	2	85.3167852417281	NA	NA	10	NA	Recipients-density-sensing (r50 = 1e+01)	24.7625767626834	1	1.93103448275862
-6.58851155053328e-12	-1.23234755733392e-13	2	85.3167852417281	NA	NA	100	NA	Recipients-density-sensing (r50 = 1e+02)	24.7625767626834	-2.66067284260256e-13	1.93103448275862
2.64654862507776	1	3	85.3167852417281	NA	NA	NA	0.01	Population-size-sensing (p50 = 0.01)	24.7625767626834	0.106876947841149	1.93103448275862
2.64653477517898	1	3	85.3167852417281	NA	NA	NA	0.1	Population-size-sensing (p50 = 0.1)	24.7625767626834	0.106876388533492	1.93103448275862
2.64654212373693	1	3	85.3167852417281	NA	NA	NA	1	Population-size-sensing (p50 = 1.0)	24.7625767626834	0.106876685294125	1.93103448275862
10.1999620634503	1	3	85.3167852417281	NA	NA	NA	10	Population-size-sensing (p50 = 1e+01)	24.7625767626834	0.411910366243525	1.93103448275862
-6.58854966556269e-12	-1.23234755733392e-13	3	85.3167852417281	NA	NA	NA	100	Population-size-sensing (p50 = 1e+02)	24.7625767626834	-2.66068823479287e-13	1.93103448275862
33.9332159338125	0.709997139700365	0	117.210229753348	0.5	NA	NA	NA	Ratio-sensing (theta = 0.5)	34.0600709127054	0.996275551533114	2.06896551724138
30.6974208664717	0.914643598003541	0	117.210229753348	0.111111111111111	NA	NA	NA	Ratio-sensing (theta = 0.11)	34.0600709127054	0.901272958155255	2.06896551724138
34.0600709127054	0.740065076036856	0	117.210229753348	0.428571428571429	NA	NA	NA	Ratio-sensing (theta = 0.43)	34.0600709127054	1	2.06896551724138
30.8582630201857	0.553840816611854	0	117.210229753348	1	NA	NA	NA	Ratio-sensing (theta = 1.0)	34.0600709127054	0.905995266400772	2.06896551724138
22.3059399405083	0.350388992144292	0	117.210229753348	2.33333333333333	NA	NA	NA	Ratio-sensing (theta = 2.3)	34.0600709127054	0.654899985313524	2.06896551724138
8.72509310991758	0.123965237899896	0	117.210229753348	9	NA	NA	NA	Ratio-sensing (theta = 9.0)	34.0600709127054	0.256167790498136	2.06896551724138
-6.75445593845294e-14	-8.88178419700125e-16	1	117.210229753348	NA	0	NA	NA	Constitutive activation (a = 0.0)	34.0600709127054	-1.98310096175793e-15	2.06896551724138
21.5674474318013	1	1	117.210229753348	NA	0.25	NA	NA	Constitutive activation (a = 0.25)	34.0600709127054	0.633217925091166	2.06896551724138
16.2539595063752	1	1	117.210229753348	NA	0.5	NA	NA	Constitutive activation (a = 0.5)	34.0600709127054	0.477214494004826	2.06896551724138
10.3153553815425	1	1	117.210229753348	NA	0.75	NA	NA	Constitutive activation (a = 0.75)	34.0600709127054	0.302857718880866	2.06896551724138
3.63576865286822	1	1	117.210229753348	NA	1	NA	NA	Constitutive activation (a = 1.0)	34.0600709127054	0.106745774610586	2.06896551724138
25.5933592241884	0.999665687788076	2	117.210229753348	NA	NA	0.01	NA	Recipients-density-sensing (r50 = 0.01)	34.0600709127054	0.75141826010237	2.06896551724138
25.8238713477626	0.996699210219226	2	117.210229753348	NA	NA	0.1	NA	Recipients-density-sensing (r50 = 0.1)	34.0600709127054	0.758186071131447	2.06896551724138
27.6972421408402	0.970239344038804	2	117.210229753348	NA	NA	1	NA	Recipients-density-sensing (r50 = 1.0)	34.0600709127054	0.813188035099138	2.06896551724138
33.7226371712768	0.803301459125342	2	117.210229753348	NA	NA	10	NA	Recipients-density-sensing (r50 = 1e+01)	34.0600709127054	0.990092981829268	2.06896551724138
4.45341509401603e-15	0	2	117.210229753348	NA	NA	100	NA	Recipients-density-sensing (r50 = 1e+02)	34.0600709127054	1.30751785732624e-16	2.06896551724138
3.63575803285465	1	3	117.210229753348	NA	NA	NA	0.01	Population-size-sensing (p50 = 0.01)	34.0600709127054	0.106745462808136	2.06896551724138
3.63573251747162	1	3	117.210229753348	NA	NA	NA	0.1	Population-size-sensing (p50 = 0.1)	34.0600709127054	0.106744713679248	2.06896551724138
3.63574593614012	1	3	117.210229753348	NA	NA	NA	1	Population-size-sensing (p50 = 1.0)	34.0600709127054	0.106745107649905	2.06896551724138
10.5398015292234	1	3	117.210229753348	NA	NA	NA	10	Population-size-sensing (p50 = 1e+01)	34.0600709127054	0.309447433513469	2.06896551724138
4.45372774133884e-15	0	3	117.210229753348	NA	NA	NA	100	Population-size-sensing (p50 = 1e+02)	34.0600709127054	1.30760965024223e-16	2.06896551724138
46.6838333248279	0.71325794477995	0	161.026202756094	0.5	NA	NA	NA	Ratio-sensing (theta = 0.5)	46.8397542840284	0.996671183237748	2.20689655172414
42.2422428751655	0.915914387540301	0	161.026202756094	0.111111111111111	NA	NA	NA	Ratio-sensing (theta = 0.11)	46.8397542840284	0.901845953738691	2.20689655172414
46.8397542840284	0.743116054332674	0	161.026202756094	0.428571428571429	NA	NA	NA	Ratio-sensing (theta = 0.43)	46.8397542840284	1	2.20689655172414
42.5708878669804	0.557746072431609	0	161.026202756094	1	NA	NA	NA	Ratio-sensing (theta = 1.0)	46.8397542840284	0.908862322565523	2.20689655172414
30.9036149909763	0.354002752623833	0	161.026202756094	2.33333333333333	NA	NA	NA	Ratio-sensing (theta = 2.3)	46.8397542840284	0.659773208962242	2.20689655172414
12.1474327019463	0.125705504736045	0	161.026202756094	9	NA	NA	NA	Ratio-sensing (theta = 9.0)	46.8397542840284	0.259340231126882	2.20689655172414
-6.04640954590535e-14	-6.66133814775094e-16	1	161.026202756094	NA	0	NA	NA	Constitutive activation (a = 0.0)	46.8397542840284	-1.29087132038331e-15	2.20689655172414
29.6298724718876	1	1	161.026202756094	NA	0.25	NA	NA	Constitutive activation (a = 0.25)	46.8397542840284	0.632579588104094	2.20689655172414
22.3300763475891	1	1	161.026202756094	NA	0.5	NA	NA	Constitutive activation (a = 0.5)	46.8397542840284	0.47673342204537	2.20689655172414
14.1714806932636	1	1	161.026202756094	NA	0.75	NA	NA	Constitutive activation (a = 0.75)	46.8397542840284	0.302552413219977	2.20689655172414
4.99465960112324	1	1	161.026202756094	NA	1	NA	NA	Constitutive activation (a = 1.0)	46.8397542840284	0.106632916364942	2.20689655172414
35.4542957385723	0.999762748299999	2	161.026202756094	NA	NA	0.01	NA	Recipients-density-sensing (r50 = 0.01)	46.8397542840284	0.756927449353885	2.20689655172414
35.674510786286	0.997648416303895	2	161.026202756094	NA	NA	0.1	NA	Recipients-density-sensing (r50 = 0.1)	46.8397542840284	0.761628905437075	2.20689655172414
37.5692984445285	0.978210165186391	2	161.026202756094	NA	NA	1	NA	Recipients-density-sensing (r50 = 1.0)	46.8397542840284	0.802081458769288	2.20689655172414
45.3398847968217	0.847286294351649	2	161.026202756094	NA	NA	10	NA	Recipients-density-sensing (r50 = 1e+01)	46.8397542840284	0.967978707187238	2.20689655172414
17.1165400069033	0.18093680755835	2	161.026202756094	NA	NA	100	NA	Recipients-density-sensing (r50 = 1e+02)	46.8397542840284	0.365427621654706	2.20689655172414
4.9946398535077	1	3	161.026202756094	NA	NA	NA	0.01	Population-size-sensing (p50 = 0.01)	46.8397542840284	0.106632494765473	2.20689655172414
4.9945925703557	1	3	161.026202756094	NA	NA	NA	0.1	Population-size-sensing (p50 = 0.1)	46.8397542840284	0.106631485299204	2.20689655172414
4.99461752230705	1	3	161.026202756094	NA	NA	NA	1	Population-size-sensing (p50 = 1.0)	46.8397542840284	0.106632018008048	2.20689655172414
10.8776397707635	1	3	161.026202756094	NA	NA	NA	10	Population-size-sensing (p50 = 1e+01)	46.8397542840284	0.232230931545955	2.20689655172414
40.5178155653971	0.512724629606539	3	161.026202756094	NA	NA	NA	100	Population-size-sensing (p50 = 1e+02)	46.8397542840284	0.865030489265675	2.20689655172414
64.2096978614616	0.716478567542124	0	221.221629107045	0.5	NA	NA	NA	Ratio-sensing (theta = 0.5)	64.3966628813145	0.997096666015172	2.3448275862069
58.0771443262906	0.917152961616608	0	221.221629107045	0.111111111111111	NA	NA	NA	Ratio-sensing (theta = 0.11)	64.3966628813145	0.901865744709923	2.3448275862069
64.3966628813145	0.746125114808274	0	221.221629107045	0.428571428571429	NA	NA	NA	Ratio-sensing (theta = 0.43)	64.3966628813145	1	2.3448275862069
58.7191605840904	0.561628455153955	0	221.221629107045	1	NA	NA	NA	Ratio-sensing (theta = 1.0)	64.3966628813145	0.91183545787632	2.3448275862069
42.8097927820505	0.357622402344102	0	221.221629107045	2.33333333333333	NA	NA	NA	Ratio-sensing (theta = 2.3)	64.3966628813145	0.664782783246867	2.3448275862069
16.9109391445887	0.127462621144711	0	221.221629107045	9	NA	NA	NA	Ratio-sensing (theta = 9.0)	64.3966628813145	0.262605830612003	2.3448275862069
9.14323875655011e-15	0	1	221.221629107045	NA	0	NA	NA	Constitutive activation (a = 0.0)	64.3966628813145	1.41983114457366e-16	2.3448275862069
40.7062238668047	1	1	221.221629107045	NA	0.25	NA	NA	Constitutive activation (a = 0.25)	64.3966628813145	0.632116976959316	2.3448275862069
30.6775902575049	1	1	221.221629107045	NA	0.5	NA	NA	Constitutive activation (a = 0.5)	64.3966628813145	0.476384782764984	2.3448275862069
19.4691172559602	1	1	221.221629107045	NA	0.75	NA	NA	Constitutive activation (a = 0.75)	64.3966628813145	0.302331151721985	2.3448275862069
6.86131887196523	1	1	221.221629107045	NA	1	NA	NA	Constitutive activation (a = 1.0)	64.3966628813145	0.106547739664878	2.3448275862069
48.9940718595053	0.999831157484359	2	221.221629107045	NA	NA	0.01	NA	Recipients-density-sensing (r50 = 0.01)	64.3966628813145	0.76081693782492	2.3448275862069
49.2062648241162	0.998322039313246	2	221.221629107045	NA	NA	0.1	NA	Recipients-density-sensing (r50 = 0.1)	64.3966628813145	0.764112030382774	2.3448275862069
51.1096377449476	0.984130187251606	2	221.221629107045	NA	NA	1	NA	Recipients-density-sensing (r50 = 1.0)	64.3966628813145	0.793669042123264	2.3448275862069
60.56186630526	0.882257560599855	2	221.221629107045	NA	NA	10	NA	Recipients-density-sensing (r50 = 1e+01)	64.3966628813145	0.940450383537386	2.3448275862069
42.7602125505793	0.357109371297773	2	221.221629107045	NA	NA	100	NA	Recipients-density-sensing (r50 = 1e+02)	64.3966628813145	0.664012863980049	2.3448275862069
6.86128210103017	1	3	221.221629107045	NA	NA	NA	0.01	Population-size-sensing (p50 = 0.01)	64.3966628813145	0.106547168658037	2.3448275862069
6.86119395868252	1	3	221.221629107045	NA	NA	NA	0.1	Population-size-sensing (p50 = 0.1)	64.3966628813145	0.106545799917116	2.3448275862069
6.86124045010616	1	3	221.221629107045	NA	NA	NA	1	Population-size-sensing (p50 = 1.0)	64.3966628813145	0.106546521871043	2.3448275862069
11.2688462228826	1	3	221.221629107045	NA	NA	NA	10	Population-size-sensing (p50 = 1e+01)	64.3966628813145	0.174991152005058	2.3448275862069
63.880309130768	0.799580746120542	3	221.221629107045	NA	NA	NA	100	Population-size-sensing (p50 = 1e+02)	64.3966628813145	0.991981669120057	2.3448275862069
88.2976946552267	0.71966414710714	0	303.91953823132	0.5	NA	NA	NA	Ratio-sensing (theta = 0.5)	88.5152643826286	0.9975420089527	2.48275862068966
79.7970219747527	0.918364394731707	0	303.91953823132	0.111111111111111	NA	NA	NA	Ratio-sensing (theta = 0.11)	88.5152643826286	0.901505774527327	2.48275862068966
88.5152643826286	0.749097613908876	0	303.91953823132	0.428571428571429	NA	NA	NA	Ratio-sensing (theta = 0.43)	88.5152643826286	1	2.48275862068966
80.9810146941258	0.565491795384177	0	303.91953823132	1	NA	NA	NA	Ratio-sensing (theta = 1.0)	88.5152643826286	0.914881916231598	2.48275862068966
59.2962911257371	0.361250312668382	0	303.91953823132	2.33333333333333	NA	NA	NA	Ratio-sensing (theta = 2.3)	88.5152643826286	0.669899045541056	2.48275862068966
23.5409304437629	0.129237674706411	0	303.91953823132	9	NA	NA	NA	Ratio-sensing (theta = 9.0)	88.5152643826286	0.265953342713879	2.48275862068966
-8.89330203269925e-14	-4.44089209850063e-16	1	303.91953823132	NA	0	NA	NA	Constitutive activation (a = 0.0)	88.5152643826286	-1.00471959212095e-15	2.48275862068966
55.9231789984718	1	1	303.91953823132	NA	0.25	NA	NA	Constitutive activation (a = 0.25)	88.5152643826286	0.631791356988218	2.48275862068966
42.1456034714001	1	1	303.91953823132	NA	0.5	NA	NA	Constitutive activation (a = 0.5)	88.5152643826286	0.476139384154303	2.48275862068966
26.7471366668055	1	1	303.91953823132	NA	0.75	NA	NA	Constitutive activation (a = 0.75)	88.5152643826286	0.302175414075301	2.48275862068966
9.42536943063973	1	1	303.91953823132	NA	1	NA	NA	Constitutive activation (a = 1.0)	88.5152643826286	0.106482983430929	2.48275862068966
67.5902631466526	0.999879609904299	2	303.91953823132	NA	NA	0.01	NA	Recipients-density-sensing (r50 = 0.01)	88.5152643826286	0.763600082065816	2.48275862068966
67.7959566395384	0.998801369692053	2	303.91953823132	NA	NA	0.1	NA	Recipients-density-sensing (r50 = 0.1)	88.5152643826286	0.765923901514591	2.48275862068966
69.6977409001889	0.988490036411685	2	303.91953823132	NA	NA	1	NA	Recipients-density-sensing (r50 = 1.0)	88.5152643826286	0.787409283430523	2.48275862068966
80.711238993738	0.90993697233323	2	303.91953823132	NA	NA	10	NA	Recipients-density-sensing (r50 = 1e+01)	88.5152643826286	0.91183412891187	2.48275862068966
74.7384221247866	0.494396328393828	2	303.91953823132	NA	NA	100	NA	Recipients-density-sensing (r50 = 1e+02)	88.5152643826286	0.844356311265272	2.48275862068966
9.42530066917799	1	3	303.91953823132	NA	NA	NA	0.01	Population-size-sensing (p50 = 0.01)	88.5152643826286	0.106482206599247	2.48275862068966
9.42513591911237	1	3	303.91953823132	NA	NA	NA	0.1	Population-size-sensing (p50 = 0.1)	88.5152643826286	0.106480345337613	2.48275862068966
9.42522297707821	1	3	303.91953823132	NA	NA	NA	1	Population-size-sensing (p50 = 1.0)	88.5152643826286	0.106481328873802	2.48275862068966
11.838558197941	1	3	303.91953823132	NA	NA	NA	10	Population-size-sensing (p50 = 1e+01)	88.5152643826286	0.133745950831328	2.48275862068966
76.1954564189987	0.947275470027914	3	303.91953823132	NA	NA	NA	100	Population-size-sensing (p50 = 1e+02)	88.5152643826286	0.860817136461633	2.48275862068966
121.402854431405	0.722818327141229	0	417.53189365604	0.5	NA	NA	NA	Ratio-sensing (theta = 0.5)	121.646149801012	0.997999974762834	2.62068965517241
109.589446115677	0.919552245397702	0	417.53189365604	0.111111111111111	NA	NA	NA	Ratio-sensing (theta = 0.11)	121.646149801012	0.900887091740616	2.62068965517241
121.646149801012	0.752037359508567	0	417.53189365604	0.428571428571429	NA	NA	NA	Ratio-sensing (theta = 0.43)	121.646149801012	1	2.62068965517241
111.668441637706	0.569338746943823	0	417.53189365604	1	NA	NA	NA	Ratio-sensing (theta = 1.0)	121.646149801012	0.917977608172337	2.62068965517241
82.1233113430165	0.364888114129849	0	417.53189365604	2.33333333333333	NA	NA	NA	Ratio-sensing (theta = 2.3)	121.646149801012	0.675099963931071	2.62068965517241
32.7683783806646	0.131031498591389	0	417.53189365604	9	NA	NA	NA	Ratio-sensing (theta = 9.0)	121.646149801012	0.269374562485266	2.62068965517241
-2.49656130294566e-14	0	1	417.53189365604	NA	0	NA	NA	Constitutive activation (a = 0.0)	121.646149801012	-2.05231427959662e-16	2.62068965517241
76.8285943793111	1	1	417.53189365604	NA	0.25	NA	NA	Constitutive activation (a = 0.25)	121.646149801012	0.631574402519004	2.62068965517241
57.9006330063025	1	1	417.53189365604	NA	0.5	NA	NA	Constitutive activation (a = 0.5)	121.646149801012	0.475975878406478	2.62068965517241
36.7458529004577	1	1	417.53189365604	NA	0.75	NA	NA	Constitutive activation (a = 0.75)	121.646149801012	0.302071647648252	2.62068965517241
12.9471490536797	1	1	417.53189365604	NA	1	NA	NA	Constitutive activation (a = 1.0)	121.646149801012	0.106432871692681	2.62068965517241
93.1346331623754	0.99991404225571	2	417.53189365604	NA	NA	0.01	NA	Recipients-density-sensing (r50 = 0.01)	121.646149801012	0.765619243311233	2.62068965517241
93.3348747045324	0.999143091324424	2	417.53189365604	NA	NA	0.1	NA	Recipients-density-sensing (r50 = 0.1)	121.646149801012	0.767265341790179	2.62068965517241
95.2273302320716	0.991679002296385	2	417.53189365604	NA	NA	1	NA	Recipients-density-sensing (r50 = 1.0)	121.646149801012	0.782822394196974	2.62068965517241
107.632277610168	0.931693712445189	2	417.53189365604	NA	NA	10	NA	Recipients-density-sensing (r50 = 1e+01)	121.646149801012	0.884798062135404	2.62068965517241
114.811623352145	0.602196046529033	2	417.53189365604	NA	NA	100	NA	Recipients-density-sensing (r50 = 1e+02)	121.646149801012	0.943816335658416	2.62068965517241
12.9470200071337	1	3	417.53189365604	NA	NA	NA	0.01	Population-size-sensing (p50 = 0.01)	121.646149801012	0.106431810857248	2.62068965517241
12.9467109674966	1	3	417.53189365604	NA	NA	NA	0.1	Population-size-sensing (p50 = 0.1)	121.646149801012	0.10642927037703	2.62068965517241
12.9468744481564	1	3	417.53189365604	NA	NA	NA	1	Population-size-sensing (p50 = 1.0)	121.646149801012	0.106430614280311	2.62068965517241
13.2885181973649	1	3	417.53189365604	NA	NA	NA	10	Population-size-sensing (p50 = 1e+01)	121.646149801012	0.109239118698801	2.62068965517241
88.5499997447574	1	3	417.53189365604	NA	NA	NA	100	Population-size-sensing (p50 = 1e+02)	121.646149801012	0.727930969369826	2.62068965517241
166.898019251802	0.725943694488414	0	573.615251044868	0.5	NA	NA	NA	Ratio-sensing (theta = 0.5)	167.154553990326	0.998465284179224	2.75862068965517
150.455011232083	0.920719051529817	0	573.615251044868	0.111111111111111	NA	NA	NA	Ratio-sensing (theta = 0.11)	167.154553990326	0.900095197171777	2.75862068965517
167.154553990326	0.754947069024569	0	573.615251044868	0.428571428571429	NA	NA	NA	Ratio-sensing (theta = 0.43)	167.154553990326	1	2.75862068965517
153.96684097113	0.573171120663043	0	573.615251044868	1	NA	NA	NA	Ratio-sensing (theta = 1.0)	167.154553990326	0.921104674061353	2.75862068965517
113.726780676974	0.368536898930602	0	573.615251044868	2.33333333333333	NA	NA	NA	Ratio-sensing (theta = 2.3)	167.154553990326	0.680369023529903	2.75862068965517
45.6103756513865	0.132844739786922	0	573.615251044868	9	NA	NA	NA	Ratio-sensing (theta = 9.0)	167.154553990326	0.272863494069245	2.75862068965517
-5.51602515444055e-14	-2.22044604925031e-16	1	573.615251044868	NA	0	NA	NA	Constitutive activation (a = 0.0)	167.154553990326	-3.2999550552238e-16	2.75862068965517
105.548950718961	1	1	573.615251044868	NA	0.25	NA	NA	Constitutive activation (a = 0.25)	167.154553990326	0.631445259487632	2.75862068965517
79.5452674520811	1	1	573.615251044868	NA	0.5	NA	NA	Constitutive activation (a = 0.5)	167.154553990326	0.475878554027818	2.75862068965517
50.4823271944009	1	1	573.615251044868	NA	0.75	NA	NA	Constitutive activation (a = 0.75)	167.154553990326	0.302009882406929	2.75862068965517
17.7839912160221	1	1	573.615251044868	NA	1	NA	NA	Constitutive activation (a = 1.0)	167.154553990326	0.106392501977848	2.75862068965517
128.225637864619	0.999938568155656	2	573.615251044868	NA	NA	0.01	NA	Recipients-density-sensing (r50 = 0.01)	167.154553990326	0.767108252833123	2.75862068965517
128.421164275902	0.999387037975055	2	573.615251044868	NA	NA	0.1	NA	Recipients-density-sensing (r50 = 0.1)	167.154553990326	0.768277987109673	2.75862068965517
130.298603185762	0.993999076150232	2	573.615251044868	NA	NA	1	NA	Recipients-density-sensing (r50 = 1.0)	167.154553990326	0.779509741585042	2.75862068965517
143.889459395122	0.948642400313517	2	573.615251044868	NA	NA	10	NA	Recipients-density-sensing (r50 = 1e+01)	167.154553990326	0.860816866547647	2.75862068965517
165.369439108827	0.687373139872164	2	573.615251044868	NA	NA	100	NA	Recipients-density-sensing (r50 = 1e+02)	167.154553990326	0.989320572853778	2.75862068965517
17.7837489463569	1	3	573.615251044868	NA	NA	NA	0.01	Population-size-sensing (p50 = 0.01)	167.154553990326	0.106391052602648	2.75862068965517
17.7831690682448	1	3	573.615251044868	NA	NA	NA	0.1	Population-size-sensing (p50 = 0.1)	167.154553990326	0.106387583489194	2.75862068965517
17.7834761879407	1	3	573.615251044868	NA	NA	NA	1	Population-size-sensing (p50 = 1.0)	167.154553990326	0.106389420828881	2.75862068965517
17.7897498060159	1	3	573.615251044868	NA	NA	NA	10	Population-size-sensing (p50 = 1e+01)	167.154553990326	0.106426952669477	2.75862068965517
96.698065692638	1	3	573.615251044868	NA	NA	NA	100	Population-size-sensing (p50 = 1e+02)	167.154553990326	0.578494952032444	2.75862068965517
229.416739615313	0.72904208376118	0	788.046281566991	0.5	NA	NA	NA	Ratio-sensing (theta = 0.5)	229.686398819544	0.998825967903989	2.89655172413793
206.509590963369	0.92186665067291	0	788.046281566991	0.111111111111111	NA	NA	NA	Ratio-sensing (theta = 0.11)	229.686398819544	0.899093686107272	2.89655172413793
229.661543907304	0.757828685824607	0	788.046281566991	0.428571428571429	NA	NA	NA	Ratio-sensing (theta = 0.43)	229.686398819544	0.99989178761839	2.89655172413793
212.264630120445	0.576990120560494	0	788.046281566991	1	NA	NA	NA	Ratio-sensing (theta = 1.0)	229.686398819544	0.924149759025188	2.89655172413793
157.477481129065	0.372197366119096	0	788.046281566991	2.33333333333333	NA	NA	NA	Ratio-sensing (theta = 2.3)	229.686398819544	0.68561953140634	2.89655172413793
63.4820701316698	0.134677908415887	0	788.046281566991	9	NA	NA	NA	Ratio-sensing (theta = 9.0)	229.686398819544	0.276385848086483	2.89655172413793
-2.35852944874852e-13	-4.44089209850063e-16	1	788.046281566991	NA	0	NA	NA	Constitutive activation (a = 0.0)	229.686398819544	-1.02684767616629e-15	2.89655172413793
145.005660138795	1	1	788.046281566991	NA	0.25	NA	NA	Constitutive activation (a = 0.25)	229.686398819544	0.631320186497941	2.89655172413793
109.281177991408	1	1	788.046281566991	NA	0.5	NA	NA	Constitutive activation (a = 0.5)	229.686398819544	0.475784280449564	2.89655172413793
69.3538215756978	1	1	788.046281566991	NA	0.75	NA	NA	Constitutive activation (a = 0.75)	229.686398819544	0.301950058567406	2.89655172413793
24.4262062459159	1	1	788.046281566991	NA	1	NA	NA	Constitutive activation (a = 1.0)	229.686398819544	0.106345897586677	2.89655172413793
176.432774648557	0.999956066305955	2	788.046281566991	NA	NA	0.01	NA	Recipients-density-sensing (r50 = 0.01)	229.686398819544	0.768146375037093	2.89655172413793
176.624113720266	0.999561354332335	2	788.046281566991	NA	NA	0.1	NA	Recipients-density-sensing (r50 = 0.1)	229.686398819544	0.768979419887346	2.89655172413793
178.482482792991	0.995680106863846	2	788.046281566991	NA	NA	1	NA	Recipients-density-sensing (r50 = 1.0)	229.686398819544	0.777070317225089	2.89655172413793
193.03582581307	0.961708912653975	2	788.046281566991	NA	NA	10	NA	Recipients-density-sensing (r50 = 1e+01)	229.686398819544	0.840432114418456	2.89655172413793
229.686398819544	0.754984278149976	2	788.046281566991	NA	NA	100	NA	Recipients-density-sensing (r50 = 1e+02)	229.686398819544	1	2.89655172413793
24.425751357562	1	3	788.046281566991	NA	NA	NA	0.01	Population-size-sensing (p50 = 0.01)	229.686398819544	0.106343917110879	2.89655172413793
24.4246608478303	1	3	788.046281566991	NA	NA	NA	0.1	Population-size-sensing (p50 = 0.1)	229.686398819544	0.106339169290646	2.89655172413793
24.425238999113	1	3	788.046281566991	NA	NA	NA	1	Population-size-sensing (p50 = 1.0)	229.686398819544	0.106341686423945	2.89655172413793
24.4344372355736	1	3	788.046281566991	NA	NA	NA	10	Population-size-sensing (p50 = 1e+01)	229.686398819544	0.106381733359714	2.89655172413793
101.083925055845	1	3	788.046281566991	NA	NA	NA	100	Population-size-sensing (p50 = 1e+02)	229.686398819544	0.440095389084239	2.89655172413793
315.324197148704	0.732114791545646	0	1082.63673387405	0.5	NA	NA	NA	Ratio-sensing (theta = 0.5)	315.512411101427	0.999403465771549	3.03448275862069
283.398954914562	0.922996392935649	0	1082.63673387405	0.111111111111111	NA	NA	NA	Ratio-sensing (theta = 0.11)	315.512411101427	0.898218088870863	3.03448275862069
315.512411101427	0.760683600758708	0	1082.63673387405	0.428571428571429	NA	NA	NA	Ratio-sensing (theta = 0.43)	315.512411101427	1	3.03448275862069
292.607116833956	0.580796512487912	0	1082.63673387405	1	NA	NA	NA	Ratio-sensing (theta = 1.0)	315.512411101427	0.927402873986762	3.03448275862069
218.039442093751	0.375869926386473	0	1082.63673387405	2.33333333333333	NA	NA	NA	Ratio-sensing (theta = 2.3)	315.512411101427	0.691064549038163	3.03448275862069
88.3523645115015	0.136531413573344	0	1082.63673387405	9	NA	NA	NA	Ratio-sensing (theta = 9.0)	315.512411101427	0.280028174495802	3.03448275862069
-2.88500531748574e-13	-4.44089209850063e-16	1	1082.63673387405	NA	0	NA	NA	Constitutive activation (a = 0.0)	315.512411101427	-9.14387268448308e-16	3.03448275862069
199.212226470798	1	1	1082.63673387405	NA	0.25	NA	NA	Constitutive activation (a = 0.25)	315.512411101427	0.631392678897687	3.03448275862069
150.133087463665	1	1	1082.63673387405	NA	0.5	NA	NA	Constitutive activation (a = 0.5)	315.512411101427	0.475838927982463	3.03448275862069
95.2799313342478	1	1	1082.63673387405	NA	0.75	NA	NA	Constitutive activation (a = 0.75)	315.512411101427	0.301984733347362	3.03448275862069
33.5462423476949	1	1	1082.63673387405	NA	1	NA	NA	Constitutive activation (a = 1.0)	315.512411101427	0.106323051542054	3.03448275862069
242.659685009897	0.999968564957878	2	1082.63673387405	NA	NA	0.01	NA	Recipients-density-sensing (r50 = 0.01)	315.512411101427	0.769097114635815	3.03448275862069
242.847221689647	0.999686002559257	2	1082.63673387405	NA	NA	0.1	NA	Recipients-density-sensing (r50 = 0.1)	315.512411101427	0.769691502283183	3.03448275862069
244.683719051305	0.996894378358223	2	1082.63673387405	NA	NA	1	NA	Recipients-density-sensing (r50 = 1.0)	315.512411101427	0.77551218412339	3.03448275862069
259.97666051403	0.971671513757871	2	1082.63673387405	NA	NA	10	NA	Recipients-density-sensing (r50 = 1e+01)	315.512411101427	0.823982358115403	3.03448275862069
312.28449956026	0.808792217708265	2	1082.63673387405	NA	NA	100	NA	Recipients-density-sensing (r50 = 1e+02)	315.512411101427	0.98976930406668	3.03448275862069
33.5453865019865	1	3	1082.63673387405	NA	NA	NA	0.01	Population-size-sensing (p50 = 0.01)	315.512411101427	0.106320338984075	3.03448275862069
33.5433353958337	1	3	1082.63673387405	NA	NA	NA	0.1	Population-size-sensing (p50 = 0.1)	315.512411101427	0.106313838110954	3.03448275862069
33.544421383872	1	3	1082.63673387405	NA	NA	NA	1	Population-size-sensing (p50 = 1.0)	315.512411101427	0.106317280092949	3.03448275862069
33.561677106427	1	3	1082.63673387405	NA	NA	NA	10	Population-size-sensing (p50 = 1e+01)	315.512411101427	0.106371971198426	3.03448275862069
104.569370163781	1	3	1082.63673387405	NA	NA	NA	100	Population-size-sensing (p50 = 1e+02)	315.512411101427	0.331427121357089	3.03448275862069
433.36392516869	0.73516272848664	0	1487.35210729351	0.5	NA	NA	NA	Ratio-sensing (theta = 0.5)	433.419672044064	0.99987137899138	3.17241379310345
388.867528195104	0.92410928563996	0	1487.35210729351	0.111111111111111	NA	NA	NA	Ratio-sensing (theta = 0.11)	433.419672044064	0.897207840985052	3.17241379310345
433.419672044064	0.763512808935065	0	1487.35210729351	0.428571428571429	NA	NA	NA	Ratio-sensing (theta = 0.43)	433.419672044064	1	3.17241379310345
403.321434808343	0.584590745376554	0	1487.35210729351	1	NA	NA	NA	Ratio-sensing (theta = 1.0)	433.419672044064	0.930556365626474	3.17241379310345
301.865580007133	0.379554778105242	0	1487.35210729351	2.33333333333333	NA	NA	NA	Ratio-sensing (theta = 2.3)	433.419672044064	0.696474109224198	3.17241379310345
122.960483134606	0.138405589463173	0	1487.35210729351	9	NA	NA	NA	Ratio-sensing (theta = 9.0)	433.419672044064	0.283698436101684	3.17241379310345
-5.49707480412921e-14	0	1	1487.35210729351	NA	0	NA	NA	Constitutive activation (a = 0.0)	433.419672044064	-1.26830302330402e-16	3.17241379310345
273.682497162625	1	1	1487.35210729351	NA	0.25	NA	NA	Constitutive activation (a = 0.25)	433.419672044064	0.631449181510159	3.17241379310345
206.256408921748	1	1	1487.35210729351	NA	0.5	NA	NA	Constitutive activation (a = 0.5)	433.419672044064	0.475881512135839	3.17241379310345
130.897837111184	1	1	1487.35210729351	NA	0.75	NA	NA	Constitutive activation (a = 0.75)	433.419672044064	0.302011758012397	3.17241379310345
46.0657690672217	1	1	1487.35210729351	NA	1	NA	NA	Constitutive activation (a = 1.0)	433.419672044064	0.106284444473804	3.17241379310345
333.64295850765	0.999977499961859	2	1487.35210729351	NA	NA	0.01	NA	Recipients-density-sensing (r50 = 0.01)	433.419672044064	0.769791913076179	3.17241379310345
333.826978127731	0.99977518011277	2	1487.35210729351	NA	NA	0.1	NA	Recipients-density-sensing (r50 = 0.1)	433.419672044064	0.770216489144019	3.17241379310345
335.639731929584	0.997769502300339	2	1487.35210729351	NA	NA	1	NA	Recipients-density-sensing (r50 = 1.0)	433.419672044064	0.774398933824722	3.17241379310345
351.465364439211	0.9791847325667	2	1487.35210729351	NA	NA	10	NA	Recipients-density-sensing (r50 = 1e+01)	433.419672044064	0.810912349182616	3.17241379310345
419.444819419468	0.851630972649928	2	1487.35210729351	NA	NA	100	NA	Recipients-density-sensing (r50 = 1e+02)	433.419672044064	0.967756764341847	3.17241379310345
46.0641557596716	1	3	1487.35210729351	NA	NA	NA	0.01	Population-size-sensing (p50 = 0.01)	433.419672044064	0.106280722198019	3.17241379310345
46.0602979623816	1	3	1487.35210729351	NA	NA	NA	0.1	Population-size-sensing (p50 = 0.1)	433.419672044064	0.106271821362319	3.17241379310345
46.0623433276151	1	3	1487.35210729351	NA	NA	NA	1	Population-size-sensing (p50 = 1.0)	433.419672044064	0.106276540495679	3.17241379310345
46.0947599217816	1	3	1487.35210729351	NA	NA	NA	10	Population-size-sensing (p50 = 1e+01)	433.419672044064	0.106351333118759	3.17241379310345
107.907069040938	1	3	1487.35210729351	NA	NA	NA	100	Population-size-sensing (p50 = 1e+02)	433.419672044064	0.248966708253075	3.17241379310345
595.54591538407	0.738186528028451	0	2043.35971785694	0.5	NA	NA	NA	Ratio-sensing (theta = 0.5)	595.54591538407	1	3.31034482758621
533.538610768352	0.925206093182307	0	2043.35971785694	0.111111111111111	NA	NA	NA	Ratio-sensing (theta = 0.11)	595.54591538407	0.89588157182519	3.31034482758621
595.345734863293	0.766317021470686	0	2043.35971785694	0.428571428571429	NA	NA	NA	Ratio-sensing (theta = 0.43)	595.54591538407	0.999663870550354	3.31034482758621
555.876952050164	0.588373038851926	0	2043.35971785694	1	NA	NA	NA	Ratio-sensing (theta = 1.0)	595.54591538407	0.933390587846911	3.31034482758621
417.883086390278	0.383251962713984	0	2043.35971785694	2.33333333333333	NA	NA	NA	Ratio-sensing (theta = 2.3)	595.54591538407	0.70168071948035	3.31034482758621
171.117186531491	0.140300714508631	0	2043.35971785694	9	NA	NA	NA	Ratio-sensing (theta = 9.0)	595.54591538407	0.287328285042702	3.31034482758621
-3.34565334838955e-13	-2.22044604925031e-16	1	2043.35971785694	NA	0	NA	NA	Constitutive activation (a = 0.0)	595.54591538407	-5.61779245221072e-16	3.31034482758621
375.991527044034	1	1	2043.35971785694	NA	0.25	NA	NA	Constitutive activation (a = 0.25)	595.54591538407	0.631339276001171	3.31034482758621
283.359961062167	1	1	2043.35971785694	NA	0.5	NA	NA	Constitutive activation (a = 0.5)	595.54591538407	0.47579868107974	3.31034482758621
179.830562319744	1	1	2043.35971785694	NA	0.75	NA	NA	Constitutive activation (a = 0.75)	595.54591538407	0.301959190172214	3.31034482758621
63.2469280956506	1	1	2043.35971785694	NA	1	NA	NA	Constitutive activation (a = 1.0)	595.54591538407	0.106199919203312	3.31034482758621
458.637376079205	0.999983891208688	2	2043.35971785694	NA	NA	0.01	NA	Recipients-density-sensing (r50 = 0.01)	595.54591538407	0.770112537474845	3.31034482758621
458.818094170344	0.999839004475625	2	2043.35971785694	NA	NA	0.1	NA	Recipients-density-sensing (r50 = 0.1)	595.54591538407	0.770415986942755	3.31034482758621
460.605909725182	0.998399155416837	2	2043.35971785694	NA	NA	1	NA	Recipients-density-sensing (r50 = 1.0)	595.54591538407	0.773417964638605	3.31034482758621
476.783527440577	0.984793407014965	2	2043.35971785694	NA	NA	10	NA	Recipients-density-sensing (r50 = 1e+01)	595.54591538407	0.800582314687016	3.31034482758621
559.92313390659	0.885666874730472	2	2043.35971785694	NA	NA	100	NA	Recipients-density-sensing (r50 = 1e+02)	595.54591538407	0.940184659893929	3.31034482758621
63.2438829520003	1	3	2043.35971785694	NA	NA	NA	0.01	Population-size-sensing (p50 = 0.01)	595.54591538407	0.106194806006207	3.31034482758621
63.236623701983	1	3	2043.35971785694	NA	NA	NA	0.1	Population-size-sensing (p50 = 0.1)	595.54591538407	0.106182616769694	3.31034482758621
63.2404808887505	1	3	2043.35971785694	NA	NA	NA	1	Population-size-sensing (p50 = 1.0)	595.54591538407	0.106189093494104	3.31034482758621
63.3014207517194	1	3	2043.35971785694	NA	NA	NA	10	Population-size-sensing (p50 = 1e+01)	595.54591538407	0.106291419547217	3.31034482758621
111.617011597806	1	3	2043.35971785694	NA	NA	NA	100	Population-size-sensing (p50 = 1e+02)	595.54591538407	0.187419657686383	3.31034482758621
818.366156057778	0.74118662456999	0	2807.21620394118	0.5	NA	NA	NA	Ratio-sensing (theta = 0.5)	818.366156057778	1	3.44827586206897
731.98468667617	0.926287406798667	0	2807.21620394118	0.111111111111111	NA	NA	NA	Ratio-sensing (theta = 0.11)	818.366156057778	0.894446429948027	3.44827586206897
817.714523140014	0.769096745629057	0	2807.21620394118	0.428571428571429	NA	NA	NA	Ratio-sensing (theta = 0.43)	818.366156057778	0.999203739166214	3.44827586206897
766.069790021406	0.592143446789639	0	2807.21620394118	1	NA	NA	NA	Ratio-sensing (theta = 1.0)	818.366156057778	0.936096616839223	3.44827586206897
578.441126926935	0.386961405178637	0	2807.21620394118	2.33333333333333	NA	NA	NA	Ratio-sensing (theta = 2.3)	818.366156057778	0.706824350744651	3.44827586206897
238.123699296068	0.14221702534798	0	2807.21620394118	9	NA	NA	NA	Ratio-sensing (theta = 9.0)	818.366156057778	0.290974519820265	3.44827586206897
-1.38908286877064e-13	-2.22044604925031e-16	1	2807.21620394118	NA	0	NA	NA	Constitutive activation (a = 0.0)	818.366156057778	-1.69738552662309e-16	3.44827586206897
516.546106905117	1	1	2807.21620394118	NA	0.25	NA	NA	Constitutive activation (a = 0.25)	818.366156057778	0.631191921955101	3.44827586206897
389.286656851531	1	1	2807.21620394118	NA	0.5	NA	NA	Constitutive activation (a = 0.5)	818.366156057778	0.475687629516348	3.44827586206897
247.055505913043	1	1	2807.21620394118	NA	0.75	NA	NA	Constitutive activation (a = 0.75)	818.366156057778	0.301888713364144	3.44827586206897
86.8160318836173	1	1	2807.21620394118	NA	1	NA	NA	Constitutive activation (a = 1.0)	818.366156057778	0.106084582360818	3.44827586206897
630.357302074057	0.999988464864975	2	2807.21620394118	NA	NA	0.01	NA	Recipients-density-sensing (r50 = 0.01)	818.366156057778	0.770263160821074	3.44827586206897
630.534885266073	0.999884695975552	2	2807.21620394118	NA	NA	0.1	NA	Recipients-density-sensing (r50 = 0.1)	818.366156057778	0.770480158054772	3.44827586206897
632.297051511747	0.998851645143212	2	2807.21620394118	NA	NA	1	NA	Recipients-density-sensing (r50 = 1.0)	818.366156057778	0.77263343166296	3.44827586206897
648.676717238396	0.988943047216519	2	2807.21620394118	NA	NA	10	NA	Recipients-density-sensing (r50 = 1e+01)	818.366156057778	0.79264851367167	3.44827586206897
745.939525758941	0.912586346748596	2	2807.21620394118	NA	NA	100	NA	Recipients-density-sensing (r50 = 1e+02)	818.366156057778	0.911498502519056	3.44827586206897
86.8103221613063	1	3	2807.21620394118	NA	NA	NA	0.01	Population-size-sensing (p50 = 0.01)	818.366156057778	0.106077605383253	3.44827586206897
86.7966520550961	1	3	2807.21620394118	NA	NA	NA	0.1	Population-size-sensing (p50 = 0.1)	818.366156057778	0.106060901239137	3.44827586206897
86.8038912789433	1	3	2807.21620394118	NA	NA	NA	1	Population-size-sensing (p50 = 1.0)	818.366156057778	0.106069747186386	3.44827586206897
86.9185233010694	1	3	2807.21620394118	NA	NA	NA	10	Population-size-sensing (p50 = 1e+01)	818.366156057778	0.106209821432221	3.44827586206897
116.640918535514	1	3	2807.21620394118	NA	NA	NA	100	Population-size-sensing (p50 = 1e+02)	818.366156057778	0.142529010604978	3.44827586206897
1124.48121903467	0.744163309849288	0	3856.62042116347	0.5	NA	NA	NA	Ratio-sensing (theta = 0.5)	1124.48121903467	1	3.58620689655172
1004.19569652232	0.927353693750076	0	3856.62042116347	0.111111111111111	NA	NA	NA	Ratio-sensing (theta = 0.11)	1124.48121903467	0.893030207640449	3.58620689655172
1123.07459841495	0.771852342515608	0	3856.62042116347	0.428571428571429	NA	NA	NA	Ratio-sensing (theta = 0.43)	1124.48121903467	0.99874909371903	3.58620689655172
1055.65342527601	0.595901903551546	0	3856.62042116347	1	NA	NA	NA	Ratio-sensing (theta = 1.0)	1124.48121903467	0.938791513283125	3.58620689655172
800.621132661196	0.390682943623863	0	3856.62042116347	2.33333333333333	NA	NA	NA	Ratio-sensing (theta = 2.3)	1124.48121903467	0.711991555846972	3.58620689655172
331.354325207062	0.144154727092628	0	3856.62042116347	9	NA	NA	NA	Ratio-sensing (theta = 9.0)	1124.48121903467	0.29467306309617	3.58620689655172
-1.0561474038781e-13	0	1	3856.62042116347	NA	0	NA	NA	Constitutive activation (a = 0.0)	1124.48121903467	-9.39230807949613e-17	3.58620689655172
709.643333209314	1	1	3856.62042116347	NA	0.25	NA	NA	Constitutive activation (a = 0.25)	1124.48121903467	0.631085091682116	3.58620689655172
534.811273174857	1	1	3856.62042116347	NA	0.5	NA	NA	Constitutive activation (a = 0.5)	1124.48121903467	0.475607119195795	3.58620689655172
339.410732904157	1	1	3856.62042116347	NA	0.75	NA	NA	Constitutive activation (a = 0.75)	1124.48121903467	0.30183761823566	3.58620689655172
119.130339297576	1	1	3856.62042116347	NA	1	NA	NA	Constitutive activation (a = 1.0)	1124.48121903467	0.105942489106083	3.58620689655172
866.269979598674	0.999991738850934	2	3856.62042116347	NA	NA	0.01	NA	Recipients-density-sensing (r50 = 0.01)	1124.48121903467	0.770373008401453	3.58620689655172
866.444558153773	0.999917412764841	2	3856.62042116347	NA	NA	0.1	NA	Recipients-density-sensing (r50 = 0.1)	1124.48121903467	0.770528260932259	3.58620689655172
868.180707872775	0.999176535838855	2	3856.62042116347	NA	NA	1	NA	Recipients-density-sensing (r50 = 1.0)	1124.48121903467	0.772072217104771	3.58620689655172
884.643193180652	0.991990246203145	2	3856.62042116347	NA	NA	10	NA	Recipients-density-sensing (r50 = 1e+01)	1124.48121903467	0.786712288480983	3.58620689655172
994.531237701986	0.933730798188526	2	3856.62042116347	NA	NA	100	NA	Recipients-density-sensing (r50 = 1e+02)	1124.48121903467	0.884435614278872	3.58620689655172
119.119588252768	1	3	3856.62042116347	NA	NA	NA	0.01	Population-size-sensing (p50 = 0.01)	1124.48121903467	0.105932928212912	3.58620689655172
119.093880245223	1	3	3856.62042116347	NA	NA	NA	0.1	Population-size-sensing (p50 = 0.1)	1124.48121903467	0.10591006610805	3.58620689655172
119.107504659282	1	3	3856.62042116347	NA	NA	NA	1	Population-size-sensing (p50 = 1.0)	1124.48121903467	0.105922182285562	3.58620689655172
119.323102755993	1	3	3856.62042116347	NA	NA	NA	10	Population-size-sensing (p50 = 1e+01)	1124.48121903467	0.106113913452843	3.58620689655172
127.157286993066	1	3	3856.62042116347	NA	NA	NA	100	Population-size-sensing (p50 = 1e+02)	1124.48121903467	0.113080845496225	3.58620689655172
1545.00759606111	0.747116773732975	0	5298.31690628371	0.5	NA	NA	NA	Ratio-sensing (theta = 0.5)	1545.00759606111	1	3.72413793103448
1377.59326330679	0.928405332222186	0	5298.31690628371	0.111111111111111	NA	NA	NA	Ratio-sensing (theta = 0.11)	1545.00759606111	0.89164174132144	3.72413793103448
1542.381953352	0.774584068741876	0	5298.31690628371	0.428571428571429	NA	NA	NA	Ratio-sensing (theta = 0.43)	1545.00759606111	0.998300563236186	3.72413793103448
1454.58320318767	0.59964825769894	0	5298.31690628371	1	NA	NA	NA	Ratio-sensing (theta = 1.0)	1545.00759606111	0.941473172621301	3.72413793103448
1108.04825888375	0.394416351072376	0	5298.31690628371	2.33333333333333	NA	NA	NA	Ratio-sensing (theta = 2.3)	1545.00759606111	0.717179813036934	3.72413793103448
461.066667613992	0.14611400084635	0	5298.31690628371	9	NA	NA	NA	Ratio-sensing (theta = 9.0)	1545.00759606111	0.298423560369184	3.72413793103448
-2.99417938343217e-14	0	1	5298.31690628371	NA	0	NA	NA	Constitutive activation (a = 0.0)	1545.00759606111	-1.93797065533245e-17	3.72413793103448
974.924897945087	1	1	5298.31690628371	NA	0.25	NA	NA	Constitutive activation (a = 0.25)	1545.00759606111	0.631016249001356	3.72413793103448
734.736452695813	1	1	5298.31690628371	NA	0.5	NA	NA	Constitutive activation (a = 0.5)	1545.00759606111	0.475555236471957	3.72413793103448
466.290539125245	1	1	5298.31690628371	NA	0.75	NA	NA	Constitutive activation (a = 0.75)	1545.00759606111	0.301804690354934	3.72413793103448
163.401374958624	1	1	5298.31690628371	NA	1	NA	NA	Constitutive activation (a = 1.0)	1545.00759606111	0.105760887762108	3.72413793103448
1190.37228435321	0.999994083016082	2	5298.31690628371	NA	NA	0.01	NA	Recipients-density-sensing (r50 = 0.01)	1545.00759606111	0.770463709944198	3.72413793103448
1190.54396529348	0.999940842597251	2	5298.31690628371	NA	NA	0.1	NA	Recipients-density-sensing (r50 = 0.1)	1545.00759606111	0.77057482974756	3.72413793103448
1192.2539694036	0.999409663225029	2	5298.31690628371	NA	NA	1	NA	Recipients-density-sensing (r50 = 1.0)	1545.00759606111	0.771681623082737	3.72413793103448
1208.70773246305	0.994214357519319	2	5298.31690628371	NA	NA	10	NA	Recipients-density-sensing (r50 = 1e+01)	1545.00759606111	0.782331255551468	3.72413793103448
1329.38648470303	0.950191738400459	2	5298.31690628371	NA	NA	100	NA	Recipients-density-sensing (r50 = 1e+02)	1545.00759606111	0.860440096276683	3.72413793103448
163.381177359142	1	3	5298.31690628371	NA	NA	NA	0.01	Population-size-sensing (p50 = 0.01)	1545.00759606111	0.105747814946457	3.72413793103448
163.332844091387	1	3	5298.31690628371	NA	NA	NA	0.1	Population-size-sensing (p50 = 0.1)	1545.00759606111	0.105716531431815	3.72413793103448
163.358458140076	1	3	5298.31690628371	NA	NA	NA	1	Population-size-sensing (p50 = 1.0)	1545.00759606111	0.105733110022596	3.72413793103448
163.763867442947	1	3	5298.31690628371	NA	NA	NA	10	Population-size-sensing (p50 = 1e+01)	1545.00759606111	0.105995509575779	3.72413793103448
164.322693005103	1	3	5298.31690628371	NA	NA	NA	100	Population-size-sensing (p50 = 1e+02)	1545.00759606111	0.106357207190457	3.72413793103448
2122.6787383978	0.750047133778271	0	7278.95384398315	0.5	NA	NA	NA	Ratio-sensing (theta = 0.5)	2122.6787383978	1	3.86206896551724
1889.79390123925	0.929442636205529	0	7278.95384398315	0.111111111111111	NA	NA	NA	Ratio-sensing (theta = 0.11)	2122.6787383978	0.89028728985417	3.86206896551724
2118.13326129886	0.777292106569815	0	7278.95384398315	0.428571428571429	NA	NA	NA	Ratio-sensing (theta = 0.43)	2122.6787383978	0.997858612791134	3.86206896551724
2004.10567626896	0.603382296616897	0	7278.95384398315	1	NA	NA	NA	Ratio-sensing (theta = 1.0)	2122.6787383978	0.944139892681857	3.86206896551724
1533.39548972029	0.398161351427124	0	7278.95384398315	2.33333333333333	NA	NA	NA	Ratio-sensing (theta = 2.3)	2122.6787383978	0.722386983005116	3.86206896551724
641.528316499754	0.148095009215026	0	7278.95384398315	9	NA	NA	NA	Ratio-sensing (theta = 9.0)	2122.6787383978	0.302225817263323	3.86206896551724
-9.16494617262431e-14	0	1	7278.95384398315	NA	0	NA	NA	Constitutive activation (a = 0.0)	2122.6787383978	-4.31763224779932e-17	3.86206896551724
1339.37502385835	1	1	7278.95384398315	NA	0.25	NA	NA	Constitutive activation (a = 0.25)	2122.6787383978	0.630983388880277	3.86206896551724
1009.39842728147	1	1	7278.95384398315	NA	0.5	NA	NA	Constitutive activation (a = 0.5)	2122.6787383978	0.475530474311609	3.86206896551724
640.601036506366	1	1	7278.95384398315	NA	0.75	NA	NA	Constitutive activation (a = 0.75)	2122.6787383978	0.301788973017129	3.86206896551724
223.990709583691	1	1	7278.95384398315	NA	1	NA	NA	Constitutive activation (a = 1.0)	2122.6787383978	0.105522661310849	3.86206896551724
1635.63166968353	0.99999576170722	2	7278.95384398315	NA	NA	0.01	NA	Recipients-density-sensing (r50 = 0.01)	2122.6787383978	0.770550738600278	3.86206896551724
1635.80053893328	0.999957623450469	2	7278.95384398315	NA	NA	0.1	NA	Recipients-density-sensing (r50 = 0.1)	2122.6787383978	0.770630293384852	3.86206896551724
1637.484436907	0.999576869982736	2	7278.95384398315	NA	NA	1	NA	Recipients-density-sensing (r50 = 1.0)	2122.6787383978	0.771423582516766	3.86206896551724
1653.86121433421	0.995830002336781	2	7278.95384398315	NA	NA	10	NA	Recipients-density-sensing (r50 = 1e+01)	2122.6787383978	0.779138729011131	3.86206896551724
1783.3229074748	0.962874889648697	2	7278.95384398315	NA	NA	100	NA	Recipients-density-sensing (r50 = 1e+02)	2122.6787383978	0.840128501414612	3.86206896551724
223.9527865563	1	3	7278.95384398315	NA	NA	NA	0.01	Population-size-sensing (p50 = 0.01)	2122.6787383978	0.105504795664623	3.86206896551724
223.861967646671	1	3	7278.95384398315	NA	NA	NA	0.1	Population-size-sensing (p50 = 0.1)	2122.6787383978	0.105462010617604	3.86206896551724
223.910145693901	1	3	7278.95384398315	NA	NA	NA	1	Population-size-sensing (p50 = 1.0)	2122.6787383978	0.105484707432887	3.86206896551724
224.671840054234	1	3	7278.95384398315	NA	NA	NA	10	Population-size-sensing (p50 = 1e+01)	2122.6787383978	0.105843543815686	3.86206896551724
225.596731767204	1	3	7278.95384398315	NA	NA	NA	100	Population-size-sensing (p50 = 1e+02)	2122.6787383978	0.106279262936173	3.86206896551724
2916.17957380831	0.752954456685533	0	10000	0.5	NA	NA	NA	Ratio-sensing (theta = 0.5)	2916.17957380831	1	4
2592.3997546367	0.930465873303694	0	10000	0.111111111111111	NA	NA	NA	Ratio-sensing (theta = 0.11)	2916.17957380831	0.88897123411753	4
2908.66628731583	0.779976585754742	0	10000	0.428571428571429	NA	NA	NA	Ratio-sensing (theta = 0.43)	2916.17957380831	0.997423585790136	4
2761.01045255989	0.607103764528388	0	10000	1	NA	NA	NA	Ratio-sensing (theta = 1.0)	2916.17957380831	0.946790272230807	4
2121.84494152316	0.401917631240014	0	10000	2.33333333333333	NA	NA	NA	Ratio-sensing (theta = 2.3)	2916.17957380831	0.727611207684372	4
892.583534277091	0.150097900336536	0	10000	9	NA	NA	NA	Ratio-sensing (theta = 9.0)	2916.17957380831	0.306079756642505	4
-5.30318068444261e-14	0	1	10000	NA	0	NA	NA	Constitutive activation (a = 0.0)	2916.17957380831	-1.81853707915424e-17	4
1840.06527797064	1	1	10000	NA	0.25	NA	NA	Constitutive activation (a = 0.25)	2916.17957380831	0.630984900414638	4
1386.73557680943	1	1	10000	NA	0.5	NA	NA	Constitutive activation (a = 0.5)	2916.17957380831	0.475531613095573	4
880.07295152265	1	1	10000	NA	0.75	NA	NA	Constitutive activation (a = 0.75)	2916.17957380831	0.301789697529958	4
306.796393544409	1	1	10000	NA	1	NA	NA	Constitutive activation (a = 1.0)	2916.17957380831	0.105204904492132	4
2247.33958381992	0.999996963985805	2	10000	NA	NA	0.01	NA	Recipients-density-sensing (r50 = 0.01)	2916.17957380831	0.770645128991514	4
2247.50571548951	0.999969643129956	2	10000	NA	NA	0.1	NA	Recipients-density-sensing (r50 = 0.1)	2916.17957380831	0.770702097935088	4
2249.16365808012	0.99969675762721	2	10000	NA	NA	1	NA	Recipients-density-sensing (r50 = 1.0)	2916.17957380831	0.771270630341492	4
2265.41381392481	0.99699937282946	2	10000	NA	NA	10	NA	Recipients-density-sensing (r50 = 1e+01)	2916.17957380831	0.776843042956492	4
2401.64676134419	0.972540465967487	2	10000	NA	NA	100	NA	Recipients-density-sensing (r50 = 1e+02)	2916.17957380831	0.823559283836495	4
306.725182853539	1	3	10000	NA	NA	NA	0.01	Population-size-sensing (p50 = 0.01)	2916.17957380831	0.105180485320038	4
306.554919991767	1	3	10000	NA	NA	NA	0.1	Population-size-sensing (p50 = 0.1)	2916.17957380831	0.105122099731132	4
306.645231937672	1	3	10000	NA	NA	NA	1	Population-size-sensing (p50 = 1.0)	2916.17957380831	0.10515306899884	4
308.07482866128	1	3	10000	NA	NA	NA	10	Population-size-sensing (p50 = 1e+01)	2916.17957380831	0.105643298316831	4
309.809663091759	1	3	10000	NA	NA	NA	100	Population-size-sensing (p50 = 1e+02)	2916.17957380831	0.106238198043192	4
